# Supplementary material for: Scar tissue removal-activated endogenous neural stem cells aid Taxol-modified collagen scaffolds in repairing chronic long-distance transected spinal cord injury
Source: Royal Society of Chemistry journal article supplement (doi:10.1039/d1bm00449b), 2021-01-01
Supplement: d1bm00449b1.xlsx [file d1bm00449b1.xlsx]

## Sheet: Expression Matrix
Accession	Description	N1	N2	I1	I2	I3	II1	II2
A0A023NLX9	Arp2/3 complex 34 kDa subunit OS=Dermacentor variabilis GN=ARPC2 PE=2 SV=1	142.8	156	155	135.6	143.7	135.3	186.1
A0A060GW64	ATP synthase protein 8 OS=Canis lupus familiaris GN=ATP8 PE=3 SV=1	623.8	679.6	767.8	631.1	662.2	647.6	716.7
A0A060GXN8	NADH-ubiquinone oxidoreductase chain 5 OS=Canis lupus familiaris GN=ND5 PE=3 SV=1	505.1	696.6	504.7	482.5	547.1	628.8	522.3
A0A0A0MPC0	Translocon-associated protein subunit alpha OS=Canis lupus familiaris GN=SSR1 PE=4 SV=1	340.8	371.5	494.6	525.3	575.9	645.5	507.3
A0A0A0MPC1	Calsequestrin OS=Canis lupus familiaris GN=CASQ2 PE=3 SV=1	57.8	42.8	51.3	46.5	60.2	380.7	54.5
A0A0A0MPC3	Nuclear factor NF-kappa-B p105 subunit OS=Canis lupus familiaris GN=NFKB1 PE=4 SV=1	185.3	157.7	214	263.1	274.8	302.6	248.4
A0A0A0MPC9	Dynein light chain Tctex-type 3 OS=Canis lupus familiaris GN=DYNLT3 PE=4 SV=1	206.4	93	92	81	104.1	96	71.8
A0A0A0MPD0	Triosephosphate isomerase OS=Canis lupus familiaris GN=TPI1 PE=3 SV=1	531.3	1384.4	822	796.9	757.2	860.2	923.4
A0A0A0MPD3	NAD(P)H-hydrate epimerase OS=Canis lupus familiaris GN=APOA1BP PE=3 SV=1	343.6	308.5	258.2	298.3	362.7	261	294.9
A0A0A0MPE1	40S ribosomal protein S17 OS=Canis lupus familiaris GN=RPS17 PE=3 SV=1	449.6	363.3	332.8	328.9	438.2	313.3	435.6
A0A0A0MPE2	Glutamine synthetase OS=Canis lupus familiaris GN=GLUL PE=3 SV=1	945	712.1	235.6	250.2	244.8	214.7	292.4
A0A0B0NQX8	Transcription factor PERIANTHIA-like protein OS=Gossypium arboreum GN=F383_20089 PE=4 SV=1	67.5	19.3	253.7	243.5	172.2	123.4	120.1
A0A0B1PXS5	Monooxygenase OS=Aureimonas altamirensis GN=LA66_18170 PE=4 SV=1	176.8	173.7	311.5	192.7	183.4	303.8	199.9
A0A0B1Q3K7	Uncharacterized protein OS=Aureimonas altamirensis GN=LA66_01910 PE=4 SV=1	30.1	22.6	119	65.1	90.7	59.2	76.7
A0A0B1Q4M8	3-hydroxyacyl-[acyl-carrier-protein] dehydratase FabZ OS=Aureimonas altamirensis GN=fabZ PE=3 SV=1	179.4	145.4	528.3	303.8	302	261.5	383.5
A0A0B1Q4W5	Triosephosphate isomerase OS=Aureimonas altamirensis GN=tpiA PE=3 SV=1	90.5	56.1	133.2	269.8	163.9	289.4	107.3
A0A0B1Q5W2	Uncharacterized protein OS=Aureimonas altamirensis GN=LA66_06505 PE=4 SV=1	95.6	58.4	879.1	788.7	594.4	437.1	405.8
A0A0B1Q7Y7	Argininosuccinate lyase OS=Aureimonas altamirensis GN=argH PE=3 SV=1	192.4	153.1	218	240	205.4	266.2	428.2
A0A0B4J194	Aspartate aminotransferase OS=Canis lupus familiaris GN=GOT2 PE=4 SV=1	2288.6	2564.8	1174.3	1306.7	1226.6	1515.1	1463.2
A0A0B4J195	Aspartate aminotransferase OS=Canis lupus familiaris GN=GOT1 PE=4 SV=1	1677.7	1597.3	598.8	561.8	587.2	596.6	575.3
A0A0B4J198	Uncharacterized protein OS=Canis lupus familiaris GN=ADIPOQ PE=4 SV=1	87.2	83.4	238.2	175.8	181.2	148	267.6
A0A0G2Y7A6	USP9Y OS=Canis lupus familiaris GN=USP9Y PE=3 SV=1	332.5	249.6	219.5	243.9	261.2	293.6	177.4
A0A0G3GR13	Uncharacterized protein OS=Corynebacterium epidermidicanis GN=CEPID_00620 PE=4 SV=1	112.3	97.1	58.5	81	70.6	126.5	62.9
A0A0G3GRP4	Uncharacterized protein OS=Corynebacterium epidermidicanis GN=CEPID_01590 PE=4 SV=1	545.6	560.3	598.8	688.8	692.6	567.7	469.1
A0A0H4IQK5	DAF-21 OS=Ancylostoma caninum GN=daf-21 PE=2 SV=1	642	471.9	257.5	260.6	264.4	296.7	278.6
A0A0K0KQB9	MHC class II antigen (Fragment) OS=Canis lupus familiaris GN=DLA-DRB1 PE=4 SV=1	131.5	106.4	194.3	253.1	209.3	613.5	202.9
A0A0N7CYP2	VP1 OS=African horse sickness virus 4 GN=VP1 PE=4 SV=1	197.8	94.2	215.3	299.5	153.1	246.9	165.6
A0A0N9H8B2	AILZ1 OS=Capsicum annuum PE=2 SV=1	400.7	145.1	358.1	351.6	346.5	799.7	331.7
A0A140DDD1	BH3 interacting domain death agonist OS=Canis lupus familiaris GN=BID PE=2 SV=1	198	106.6	131.9	130.5	135.5	154.9	128
A0A140T8E0	Uncharacterized protein OS=Canis lupus familiaris GN=CAPRIN1 PE=4 SV=1	238.1	236.4	214.8	208.2	232.8	222.4	261
A0A140T8E6	Uncharacterized protein OS=Canis lupus familiaris GN=JUP PE=4 SV=1	210.6	158.7	127.8	165.8	137.8	132.9	147.4
A0A1B1X461	ATP synthase subunit gamma OS=Canis lupus familiaris PE=2 SV=1	705.6	965.1	382.9	413.9	435.6	581.6	421.3
A0A1B1X469	ATP synthase subunit alpha OS=Canis lupus familiaris PE=2 SV=1	2218.5	2671.1	1347.6	1316.1	1383.1	1474.7	1367
A0A1B4XKA2	DLA class I molecule (Fragment) OS=Canis lupus familiaris GN=DLA-88 PE=2 SV=1	155	172.9	170.2	145.4	206.7	246	204.7
A0A1K0FUG1	Globin A1 OS=Canis lupus familiaris GN=GLNA1 PE=3 SV=1	4464.7	2246.2	11211.8	10821.6	10936.6	6379.1	7181.7
A0A1S7J0A8	Monocyte differentiation antigen CD14 OS=Canis lupus familiaris GN=607076 PE=2 SV=1	48.2	37.5	141.3	128.3	119	104.1	120.3
A0M8U6	Testin OS=Canis lupus familiaris GN=TES PE=3 SV=1	394.3	250.5	466.6	482.3	525.9	531.5	491.5
A0M8V0	F-actin-capping protein subunit alpha-2 OS=Canis lupus familiaris GN=CAPZA2 PE=3 SV=1	511.2	531.5	365.1	423.7	411.9	481	476.5
A0MZ32	MHC class I antigen (Fragment) OS=Canis lupus familiaris GN=DLA-88 PE=3 SV=1	52	68.9	54	382.7	180.6	43.7	49.4
A1DZY5	Mitochondrial diablo-like protein OS=Canis lupus familiaris GN=DIABLO PE=2 SV=1	483.8	261.7	229.9	286.1	297.3	387.2	252.5
A1ILJ0	Alpha 1 antitrypsin OS=Canis lupus familiaris PE=2 SV=1	408	688.4	881.9	473.5	574.1	322.5	729.3
A1XD97	Tuftelin-interacting protein 11 OS=Canis lupus familiaris GN=TFIP11 PE=2 SV=1	44.9	33.6	46.7	61	57.1	80.2	48.3
A1YVW4	Major prion protein OS=Canis lupus familiaris GN=Prnp PE=3 SV=1	206.4	240	176.3	187.8	190.8	183.2	233.1
A4GT58	Cdc42 GTPase-activating protein OS=Canis lupus familiaris GN=ARHGAP1 PE=2 SV=1	390.5	331.8	303.2	351.5	363.5	333.8	364.9
A5H028	Ribonuclease L OS=Canis lupus familiaris GN=RNASEL PE=2 SV=1	43.7	48.7	108.7	115.2	100.3	169.6	83.3
A7E3K7	Predicted NADPH oxidase-2 OS=Canis lupus familiaris GN=Nox2 PE=2 SV=1	169.4	188.5	312	342.2	329.2	355.9	238.7
A7E3M4	Cytochrome b-245 light chain OS=Canis lupus familiaris GN=cyba PE=2 SV=1	394.2	261.8	667.2	837.7	719.8	905.7	542.8
A7E3N1	Predicted neutrophil cytosolic factor 2 OS=Canis lupus familiaris GN=ncf2 PE=2 SV=1	29.2	11.8	29	34.3	36.2	43.1	32.6
A7VLI5	Glycophorin C OS=Canis lupus familiaris GN=Gypc PE=2 SV=1	40.6	24.5	54	54.6	67.5	54.9	50.4
A8W340	Prohibitin OS=Canis lupus familiaris PE=2 SV=1	500.7	657.9	517.8	489.2	502	551.5	456.7
A9YEF4	Caspase-1/caspase-4 hybrid OS=Canis lupus familiaris PE=2 SV=1	171.7	145.3	240.8	263	279.1	366.8	206.5
B0FLR1	P2X purinoceptor OS=Canis lupus familiaris GN=P2RX7 PE=2 SV=1	137.3	213.7	194.9	181.5	171.3	225.4	229.1
B1H0W0	Cation-independent mannose-6-phosphate/insulin-like growth factor 2 receptor protein OS=Canis lupus familiaris GN=CI-MPR/IGF2R PE=2 SV=1	412.8	230.1	275.1	316.3	287.7	380.9	275.1
B4YY02	Adenylate kinase isoenzyme 1 OS=Canis lupus familiaris GN=AK1 PE=3 SV=1	577.2	1259.8	398.1	412.1	526.5	401.5	445.5
B5TMF7	Glyceraldehyde-3-phosphate dehydrogenase OS=Dermacentor variabilis GN=GAPDH PE=2 SV=1	398.6	378.4	311.8	393.6	356.6	355.6	307.9
B6CAN1	Calcium-transporting ATPase OS=Canis lupus familiaris PE=2 SV=1	1099.4	873.5	810.9	860.3	862.9	2216.7	759.7
B6F250	Erythrocyte band 7 integral membrane protein stomatin OS=Canis lupus familiaris GN=STOM PE=2 SV=1	424.1	292.6	509.9	570.8	554.7	651.5	439.2
B6F2G5	Fragile histidine triad OS=Canis lupus familiaris GN=FHIT PE=2 SV=1	149.1	123.2	231.1	243.7	213.2	196.2	183.4
B6V8E6	Catenin beta-1 OS=Canis lupus familiaris GN=CTNNB1 PE=1 SV=1	790.6	722.1	588.5	607.3	645.9	579.8	693.6
B7SP59	60S ribosomal protein L35-like protein OS=Dermacentor variabilis PE=2 SV=1	308.2	199.6	203	200	186	167.3	336.5
B7SP62	Ubiquitin/ribosomal protein S27a fusion protein OS=Dermacentor variabilis PE=2 SV=1	875.3	1094.1	1044.8	1063.4	1075.8	1037.8	914.7
C0JW85	Cytochrome c oxidase subunit 2 OS=Ancylostoma caninum GN=COX2 PE=3 SV=1	50	132.3	36.2	33.2	34.9	82.7	36.5
C1KG39	Cytochrome P450 family 1 subfamily B polypeptide 1 OS=Canis lupus familiaris GN=CYP1B1 PE=1 SV=1	151	55.4	188.7	157.6	241.9	193.2	187.8
C5NM83	Chromogranin A (Fragment) OS=Canis lupus familiaris PE=2 SV=1	136.3	86.7	103.1	102	97.1	89	77.4
C7C419	Serpin peptidase inhibitor, clade H (Heat shock protein 47), member 1, (Collagen binding protein 1) OS=Canis lupus familiaris GN=SERPINH1 PE=1 SV=1	930.4	828.4	2615.6	2495.7	2222.4	1638.8	2612.7
C9W1B8	40S ribosomal protein S13 OS=Rhipicephalus sanguineus PE=2 SV=1	195.1	131.4	126.1	112	107	107.3	114.4
C9W1L6	40S ribosomal protein S27 OS=Rhipicephalus sanguineus PE=2 SV=1	155.8	161.5	207.8	247.1	262.1	329.1	236.9
C9W1M4	40S ribosomal protein S5 OS=Rhipicephalus sanguineus PE=2 SV=1	248.8	237.7	268.4	302.4	303.9	376.3	305.4
C9W1Q6	Ubiquitin-conjugating enzyme OS=Rhipicephalus sanguineus PE=2 SV=1	1362.4	1351.2	944.7	990.6	947.4	895	884.9
D0VWQ3	Ribosomal protein L18 OS=Canis lupus familiaris GN=RPL18 PE=1 SV=2	318.4	426.3	414.4	481.9	479	527.3	508.8
D0VWQ5	60S ribosomal protein L19 OS=Canis lupus familiaris GN=RPL19 PE=1 SV=1	276.1	171.5	134.2	135.8	180.5	158.4	205.1
D3YJ60	Chitinase 3-like 1 OS=Canis lupus familiaris GN=CHI3L1 PE=2 SV=1	222.8	310.6	351.9	496.3	330	297	396.4
E2FGH6	Kallikrein-related peptidase 6 OS=Canis lupus familiaris GN=KLK6 PE=2 SV=1	1121.4	1035.3	224.9	227.6	218.5	218.3	263.1
E2QRQ8	Uncharacterized protein OS=Canis lupus familiaris GN=QARS PE=3 SV=1	417.7	392.8	371.8	371.1	384.9	437.2	370.5
E2QRR5	Uncharacterized protein OS=Canis lupus familiaris GN=RARS PE=3 SV=1	571.5	424.2	481.8	519.6	510.7	557.1	455.6
E2QRS3	Uncharacterized protein OS=Canis lupus familiaris GN=CHAD PE=4 SV=1	212.4	202	591.6	528.6	384.4	273.8	804.1
E2QRT0	Uncharacterized protein OS=Canis lupus familiaris GN=HNRNPDL PE=4 SV=1	175.1	200.2	188.3	230.6	253.8	193.2	272.2
E2QRU0	Uncharacterized protein OS=Canis lupus familiaris GN=DNAJC8 PE=4 SV=1	112.9	143.4	178	160.7	240	194.5	256.2
E2QRU5	Uncharacterized protein OS=Canis lupus familiaris GN=FAM162A PE=4 SV=1	420	357.7	296.9	260.8	262.6	281.8	298.4
E2QRU7	Uncharacterized protein OS=Canis lupus familiaris GN=CUL2 PE=3 SV=1	472.2	389	328.5	350.3	343.3	337.3	323.4
E2QRU9	Uncharacterized protein OS=Canis lupus familiaris GN=RAD21 PE=4 SV=1	280.9	188.6	233.1	273.7	274.6	272.8	239.1
E2QRX1	Uncharacterized protein OS=Canis lupus familiaris GN=VPS35 PE=4 SV=1	681.3	594.4	564.1	568.3	582.1	582.8	592.1
E2QRY7	Uncharacterized protein OS=Canis lupus familiaris GN=BNIP1 PE=4 SV=2	696.9	604.2	381	397.6	455.6	460.4	317.4
E2QS06	Uncharacterized protein OS=Canis lupus familiaris GN=HAPLN2 PE=4 SV=1	423.9	615.5	167.5	211.7	221.9	210.7	190
E2QS13	Uncharacterized protein OS=Canis lupus familiaris GN=PARK7 PE=4 SV=1	749.2	1633.9	809.8	830.8	758.9	685.6	814.6
E2QS34	Uncharacterized protein OS=Canis lupus familiaris GN=CCAR1 PE=4 SV=1	250.9	143	224.9	262.2	268.3	251.1	220.4
E2QS43	Uncharacterized protein OS=Canis lupus familiaris GN=TARDBP PE=4 SV=1	407.8	419.2	447.2	504.7	532.9	549	493.7
E2QS57	Uncharacterized protein OS=Canis lupus familiaris GN=CPLX1 PE=4 SV=1	390.1	425.4	163.4	169.3	161.5	126.1	261.1
E2QS58	Uncharacterized protein OS=Canis lupus familiaris GN=CRABP2 PE=3 SV=1	176.9	200.3	378.7	404.2	416.8	279.5	519.5
E2QS94	Uncharacterized protein OS=Canis lupus familiaris GN=HRSP12 PE=4 SV=1	277	442	189.1	200.7	208.1	195.9	199.8
E2QSB9	Microtubule-associated protein OS=Canis lupus familiaris GN=MAP2 PE=4 SV=1	793.3	1637.6	358.3	367.3	360.3	363.4	339.8
E2QSD6	Uncharacterized protein OS=Canis lupus familiaris GN=NDRG3 PE=4 SV=1	669	725.7	550.4	409.1	446.6	367.6	468.1
E2QSE3	Uncharacterized protein OS=Canis lupus familiaris GN=FLOT1 PE=4 SV=1	168.8	189.6	260.3	252.7	232.5	190.7	220.2
E2QSF3	Uncharacterized protein OS=Canis lupus familiaris GN=SPATS2 PE=4 SV=1	59.5	35.8	55.5	56.5	72.9	67.8	66.9
E2QSF4	Tubulin beta chain OS=Canis lupus familiaris GN=TUBB PE=3 SV=1	250.7	493.3	409.3	312	396.2	298	425.5
E2QSK4	Uncharacterized protein OS=Canis lupus familiaris GN=CPXM1 PE=4 SV=1	54.6	71.7	158.5	151.1	131	93.7	137.6
E2QSQ5	Uncharacterized protein OS=Canis lupus familiaris GN=OGT PE=4 SV=1	1069.3	475.7	274.9	316.3	310.1	310.6	261.3
E2QSW8	Sulfotransferase OS=Canis lupus familiaris GN=SULT4A1 PE=3 SV=1	118.6	359.4	135.5	204.9	129	142.8	105.3
E2QSZ5	Coronin OS=Canis lupus familiaris GN=CORO1A PE=3 SV=1	752	772.5	920.5	861.9	918	1045.3	810.6
E2QT37	Uncharacterized protein OS=Canis lupus familiaris GN=NUP50 PE=4 SV=1	70.6	108.8	164.9	188	202.4	247.1	156.8
E2QT97	Uncharacterized protein OS=Canis lupus familiaris GN=CBX1 PE=4 SV=1	250.6	123.8	236.9	228.6	225.9	249.8	233.8
E2QTC7	Uncharacterized protein OS=Canis lupus familiaris GN=PPID PE=4 SV=1	617.9	679.6	508.4	533.2	536.9	501.2	534.3
E2QTE2	Uncharacterized protein OS=Canis lupus familiaris GN=PNPO PE=3 SV=1	200.5	360.6	146	144.6	166.2	176.3	143.8
E2QTE3	Uncharacterized protein OS=Canis lupus familiaris GN=ERGIC1 PE=4 SV=1	140.3	132.6	422.6	268.2	302.4	262.1	448.8
E2QTH4	Uncharacterized protein OS=Canis lupus familiaris GN=SCRN2 PE=4 SV=1	123.7	133	134.4	136.8	139.1	104.3	142.3
E2QTL3	Mitochondrial fission 1 protein OS=Canis lupus familiaris GN=FIS1 PE=3 SV=1	299.6	497.3	265.2	326.5	294.6	316.3	384.2
E2QTN0	Kinesin-like protein OS=Canis lupus familiaris GN=KIF5B PE=3 SV=1	1731.7	1310.1	912.7	1125.6	1026.7	1074.8	1089.3
E2QTP2	Uncharacterized protein OS=Canis lupus familiaris GN=SEPT11 PE=3 SV=1	664.8	537.8	490.1	563.4	595.7	412.2	674
E2QTP7	Uncharacterized protein OS=Canis lupus familiaris GN=RAB4A PE=4 SV=1	266.2	146.3	186.1	195.4	200.4	171.2	162.7
E2QTQ8	Uncharacterized protein OS=Canis lupus familiaris GN=SQRDL PE=4 SV=1	234.7	309.7	391.9	367.5	419.2	427.4	389.1
E2QTR2	Uncharacterized protein OS=Canis lupus familiaris GN=SAMHD1 PE=4 SV=1	89.1	75.5	112.1	155.4	161.7	282.5	113.1
E2QTU3	Uncharacterized protein OS=Canis lupus familiaris PE=4 SV=2	173.8	133.3	206.1	199.4	233.6	207.5	188.2
E2QU08	Uncharacterized protein OS=Canis lupus familiaris GN=ASS1 PE=3 SV=1	704.8	1093.6	649	613.2	567.6	556.7	561.9
E2QU22	Poly [ADP-ribose] polymerase OS=Canis lupus familiaris GN=TNKS PE=4 SV=1	460.4	48	37.1	41.2	47.5	48.9	31.1
E2QU31	Uncharacterized protein OS=Canis lupus familiaris GN=FARSA PE=4 SV=1	394.6	298	266.5	232.3	254.7	242.3	244.3
E2QU79	Uncharacterized protein OS=Canis lupus familiaris GN=COASY PE=3 SV=2	346.5	189.4	130.4	169.9	162.2	220.3	123.8
E2QU91	Uncharacterized protein OS=Canis lupus familiaris GN=CLIP2 PE=4 SV=2	797.4	706.6	350.1	378.3	400.5	418.7	380.7
E2QU97	Enolase-phosphatase E1 OS=Canis lupus familiaris GN=ENOPH1 PE=3 SV=2	104.2	78.5	61.8	74.6	84.7	90.3	65.9
E2QUA6	Uncharacterized protein OS=Canis lupus familiaris GN=STXBP3 PE=3 SV=1	412.3	307.2	333.2	333	337	290.6	313.6
E2QUA8	Uncharacterized protein OS=Canis lupus familiaris GN=COX4I1 PE=4 SV=1	607.5	1020.1	697.7	612	675.3	818.4	652.6
E2QUB9	Isocitrate dehydrogenase [NAD] subunit, mitochondrial OS=Canis lupus familiaris GN=IDH3B PE=3 SV=1	450	471.1	332.6	307.7	334.5	266	274.2
E2QUD2	Uncharacterized protein OS=Canis lupus familiaris GN=MGARP PE=4 SV=2	182	111.1	176.7	230	246.6	193.2	218.8
E2QUE7	Uncharacterized protein OS=Canis lupus familiaris GN=RPL26 PE=3 SV=2	155.8	183.7	127.2	117.5	161.6	157.1	174.9
E2QUG4	Uncharacterized protein OS=Canis lupus familiaris GN=POSTN PE=4 SV=2	832.5	586.3	2739.7	1853.2	2673.8	1456.4	2562.2
E2QUI9	ATP-dependent (S)-NAD(P)H-hydrate dehydratase OS=Canis lupus familiaris GN=NAXD PE=3 SV=1	163.6	155.7	80.8	76.1	74	82.5	100
E2QUJ8	Uncharacterized protein OS=Canis lupus familiaris GN=GHITM PE=3 SV=1	474.4	249.1	440.6	487.8	518.5	678.4	434.5
E2QUK3	Uncharacterized protein OS=Canis lupus familiaris GN=SLMAP PE=4 SV=2	168.3	109.8	148.8	189.8	179.4	256	155.4
E2QUL2	Uncharacterized protein OS=Canis lupus familiaris GN=VAMP8 PE=4 SV=2	193.1	322	232.9	257.1	230.4	229.3	188.3
E2QUL3	Uncharacterized protein OS=Canis lupus familiaris GN=ACSL1 PE=4 SV=1	258.9	236.6	258.4	286.7	266	520.9	202.7
E2QUN6	Uncharacterized protein OS=Canis lupus familiaris GN=FOCAD PE=4 SV=2	168.3	131.2	181.4	161.1	166.2	186.4	191.7
E2QUQ0	Uncharacterized protein OS=Canis lupus familiaris GN=ACTN2 PE=4 SV=2	915	500.6	576.8	566.5	608	4876.2	580.4
E2QUR2	Uncharacterized protein OS=Canis lupus familiaris GN=EPRS PE=3 SV=1	1000.1	806.2	916	925.6	991.1	927.2	936.6
E2QUR6	Uncharacterized protein OS=Canis lupus familiaris GN=GPNMB PE=4 SV=1	187.4	188.9	367.3	501.4	361.8	363.3	355.2
E2QUR8	Uncharacterized protein OS=Canis lupus familiaris GN=MYO6 PE=4 SV=2	282.5	241.4	216.8	257.5	247.4	239	233.3
E2QUS9	Uncharacterized protein OS=Canis lupus familiaris GN=LOC609748 PE=3 SV=2	338.9	1188.9	381.2	376.6	509	384.6	498.2
E2QUT9	Uncharacterized protein OS=Canis lupus familiaris GN=GGH PE=4 SV=2	357	475	643.2	761.4	569.3	762.6	513.2
E2QUU0	Uncharacterized protein OS=Canis lupus familiaris GN=TRIP11 PE=4 SV=2	436.6	1459.1	301.7	276.1	280.6	257	275
E2QUU1	Eukaryotic translation initiation factor 3 subunit J OS=Canis lupus familiaris GN=EIF3J PE=3 SV=1	634.7	678.4	1214.8	1327.1	1135.4	665.4	1610.6
E2QUU5	60 kDa heat shock protein, mitochondrial OS=Canis lupus familiaris GN=HSPD1 PE=3 SV=2	1210.9	1717.4	912.3	905.2	909.6	902.6	942.5
E2QUU7	Uncharacterized protein OS=Canis lupus familiaris GN=TPPP PE=4 SV=1	536.2	1369.9	218.3	205.7	212.7	448.8	226.7
E2QUV3	Uncharacterized protein OS=Canis lupus familiaris GN=AHSG PE=3 SV=2	528.9	575.9	2113.8	1243.1	1699.9	878.9	1089.2
E2QUV4	Uncharacterized protein OS=Canis lupus familiaris GN=SCYL1 PE=4 SV=2	54.2	79.2	124.4	97.9	175.8	95.2	140.6
E2QUY1	Uncharacterized protein OS=Canis lupus familiaris GN=RASA3 PE=4 SV=2	143.8	214.1	238.9	283.8	301.2	281.5	238.4
E2QUY5	Uncharacterized protein OS=Canis lupus familiaris GN=RIBC1 PE=4 SV=2	1016.6	144	600.6	623	531.2	2770.1	474.2
E2QUY7	Uncharacterized protein OS=Canis lupus familiaris GN=PSMD3 PE=4 SV=2	381.8	340	374.1	440.1	412.5	406.6	337
E2QUZ0	Uncharacterized protein OS=Canis lupus familiaris GN=RELL1 PE=4 SV=2	314.9	341.9	266.1	328.5	290.3	232.3	249.6
E2QV08	Malate dehydrogenase OS=Canis lupus familiaris GN=MDH1 PE=3 SV=2	3751.6	4192.5	1232.4	1213.7	1196.1	1456.1	1334.5
E2QV12	Uncharacterized protein OS=Canis lupus familiaris GN=PGM2 PE=4 SV=1	552.8	364.3	375.2	624	474.4	529.8	450
E2QV27	Uncharacterized protein OS=Canis lupus familiaris GN=LBR PE=4 SV=1	179.2	1162.3	362.4	336.7	391.5	375.8	470.7
E2QV28	Uncharacterized protein OS=Canis lupus familiaris GN=NDUFB7 PE=4 SV=1	283	251.9	217.4	244.3	244	267.2	205.7
E2QV38	Uncharacterized protein OS=Canis lupus familiaris PE=4 SV=1	243.1	168.4	404.8	367.7	429.1	415.1	395.3
E2QV49	Uncharacterized protein OS=Canis lupus familiaris PE=4 SV=1	127	236.8	57.9	68.1	68.3	82.8	99.1
E2QV97	Uncharacterized protein OS=Canis lupus familiaris GN=NARS PE=4 SV=1	464.7	387.4	234.6	243.3	271.5	269.5	255.3
E2QVC0	Uncharacterized protein OS=Canis lupus familiaris GN=ATP6V1D PE=4 SV=1	1064.9	936.3	257.9	312.6	300.6	321.8	295.2
E2QVF9	Uncharacterized protein OS=Canis lupus familiaris GN=AIMP2 PE=4 SV=1	318.4	305.2	365.1	366.4	409.1	383.6	345.3
E2QVN6	Uncharacterized protein OS=Canis lupus familiaris GN=TCEA1 PE=4 SV=1	179.4	218.2	206.3	218.8	239.5	218	264.2
E2QVP0	Uncharacterized protein OS=Canis lupus familiaris GN=PLD3 PE=4 SV=1	415.4	469.7	506.6	552.4	459.8	443.4	499.4
E2QVP4	NADH dehydrogenase [ubiquinone] flavoprotein 2 OS=Canis lupus familiaris GN=NDUFV2 PE=4 SV=1	196.5	294.3	287.5	296.7	283.7	265.9	288.9
E2QVP6	Uncharacterized protein OS=Canis lupus familiaris GN=YWHAG PE=3 SV=1	3316.9	2298.4	761.1	905.2	864.5	1053.9	961.4
E2QVU9	Uncharacterized protein OS=Canis lupus familiaris GN=BLVRB PE=4 SV=1	683.5	630.6	1286.2	1127	1002.8	735.1	830.7
E2QW05	Uncharacterized protein OS=Canis lupus familiaris GN=WDR77 PE=4 SV=2	187.6	147.5	133.1	169.9	190.4	204.7	150
E2QW06	Uncharacterized protein OS=Canis lupus familiaris GN=ATP5F1 PE=4 SV=1	496.5	584.7	354	376.4	362.7	442.9	352.8
E2QW49	Uncharacterized protein OS=Canis lupus familiaris GN=PA2G4 PE=4 SV=1	664.3	463.8	684.8	704.7	696.9	610.2	660
E2QW54	Uncharacterized protein OS=Canis lupus familiaris GN=LIMA1 PE=4 SV=2	152.5	155.1	331.3	385.2	391.3	258.4	438.5
E2QW60	Uncharacterized protein OS=Canis lupus familiaris GN=LMAN1 PE=4 SV=2	303	221.8	370.7	383.2	425.2	673.2	362.9
E2QW69	Uncharacterized protein OS=Canis lupus familiaris GN=RAB5B PE=4 SV=1	223.2	173.7	108.9	141.9	117.7	92	129.9
E2QW94	Uncharacterized protein OS=Canis lupus familiaris GN=LDB3 PE=4 SV=2	104.5	107.6	156.7	131.3	153	347.8	146.6
E2QWB0	Uncharacterized protein OS=Canis lupus familiaris GN=CLIP1 PE=4 SV=2	256.3	166.6	146.7	155.4	159.5	200.4	139.9
E2QWC9	Uncharacterized protein OS=Canis lupus familiaris GN=MCCC2 PE=4 SV=2	634.8	458.6	519.3	443.1	480.1	442.8	505.2
E2QWD1	Uncharacterized protein OS=Canis lupus familiaris GN=GLRX PE=4 SV=1	98.7	132.1	84.3	110.1	97.8	140.2	72.5
E2QWD3	Uncharacterized protein OS=Canis lupus familiaris GN=CRK PE=4 SV=2	151.7	166.9	178.2	156.8	164.5	132	192.2
E2QWE0	Uncharacterized protein OS=Canis lupus familiaris GN=COPS5 PE=4 SV=1	431.8	297.9	201.6	246.9	219.8	221.2	200.2
E2QWE3	Uncharacterized protein OS=Canis lupus familiaris GN=HGS PE=4 SV=2	396.7	389.3	321.2	314.2	316	247.1	351.9
E2QWF5	Peptidylprolyl isomerase OS=Canis lupus familiaris GN=FKBP4 PE=4 SV=2	706.1	628.2	374.8	384.6	388	358.1	406.5
E2QWF8	40S ribosomal protein S24 OS=Canis lupus familiaris GN=LOC106557831 PE=3 SV=2	847.1	555.8	459.1	523.5	519.4	517.6	568.9
E2QWG3	Uncharacterized protein OS=Canis lupus familiaris GN=PPM1A PE=3 SV=2	298.8	325.6	250	275.9	256.3	219.3	244.7
E2QWG8	Eukaryotic translation initiation factor 3 subunit M OS=Canis lupus familiaris GN=EIF3M PE=3 SV=1	304.2	178.7	207.3	278.5	241.9	305.8	207.9
E2QWJ2	Uncharacterized protein OS=Canis lupus familiaris GN=GOLGA5 PE=4 SV=1	224.4	168.6	220.6	221.7	224.7	228	178.7
E2QWJ6	Protein phosphatase 1 regulatory subunit OS=Canis lupus familiaris GN=PPP1R12A PE=4 SV=2	167.9	121.7	212.9	259	275.7	255.2	281.4
E2QWJ8	Uncharacterized protein OS=Canis lupus familiaris GN=LAMTOR1 PE=4 SV=1	49.9	29	64.5	84.4	72	64.5	58.5
E2QWK3	Uncharacterized protein OS=Canis lupus familiaris GN=DHRS7 PE=3 SV=1	149.4	123.1	131	164.8	132.9	179.4	140.4
E2QWL1	Uncharacterized protein OS=Canis lupus familiaris GN=TMOD3 PE=4 SV=1	149.2	156.2	193.8	186.6	227.7	154.8	231.6
E2QWM9	Ubiquitin carboxyl-terminal hydrolase OS=Canis lupus familiaris GN=UCHL5 PE=3 SV=1	390.6	328.8	375.9	375.2	386.2	378.9	357.9
E2QWN4	Uncharacterized protein OS=Canis lupus familiaris GN=NANS PE=4 SV=1	467.5	399.2	410.6	418.6	422.4	422.9	469.8
E2QWN7	Uncharacterized protein OS=Canis lupus familiaris GN=LCP1 PE=4 SV=1	1212.5	990.1	1288.4	1533.6	1529.8	1897.9	1406
E2QWP1	Uncharacterized protein OS=Canis lupus familiaris GN=BROX PE=4 SV=1	541.4	333.1	163.2	212.9	237.9	258.1	181.6
E2QWR3	Uncharacterized protein OS=Canis lupus familiaris GN=RCC2 PE=4 SV=2	179.1	102	206.5	216.8	247	288.8	239.1
E2QWR5	Uncharacterized protein OS=Canis lupus familiaris GN=DNAJC7 PE=4 SV=1	231.6	246.5	110.4	129.9	135.6	138.6	121.7
E2QWS2	Uncharacterized protein OS=Canis lupus familiaris GN=RAB23 PE=4 SV=2	277.9	207.2	95.4	122.1	124.1	98.1	137.2
E2QWT1	Uncharacterized protein OS=Canis lupus familiaris GN=CASC4 PE=4 SV=2	100.9	90.5	87.1	105.6	107.2	116.4	103.3
E2QWT2	Uncharacterized protein OS=Canis lupus familiaris GN=REXO2 PE=3 SV=2	241.1	385.4	180.8	194.1	198.9	162.2	212.8
E2QWT9	Uncharacterized protein OS=Canis lupus familiaris GN=GRIPAP1 PE=4 SV=2	318.7	253	392.6	580.1	430.3	417.1	384.3
E2QWU0	Actin-related protein 2/3 complex subunit 4 OS=Canis lupus familiaris GN=ARPC4 PE=3 SV=2	252.4	229.5	192.1	241.8	213.1	300.4	230.9
E2QWU2	Uncharacterized protein OS=Canis lupus familiaris GN=SNRPA1 PE=4 SV=1	132.7	101.8	134	160.7	158.6	217.4	148
E2QWU5	Uncharacterized protein OS=Canis lupus familiaris GN=MRAS PE=4 SV=1	324	465.4	69.3	73.8	81.6	74.1	122.1
E2QWV5	Uncharacterized protein OS=Canis lupus familiaris GN=MNDA PE=4 SV=2	90.7	53.2	247.4	206.8	260.2	191.3	186.5
E2QWX5	Uncharacterized protein OS=Canis lupus familiaris GN=TRAPPC3 PE=4 SV=1	481.8	281.6	230.7	242.5	263.7	287.4	240.5
E2QWY5	Uncharacterized protein OS=Canis lupus familiaris GN=NDUFB10 PE=4 SV=1	103.3	186.6	205.2	365.8	194.8	202.7	113.4
E2QWY6	Uncharacterized protein OS=Canis lupus familiaris GN=RPS2 PE=3 SV=2	466.5	437.3	640	732.5	713.7	718.8	701.5
E2QWZ7	Sulfhydryl oxidase OS=Canis lupus familiaris PE=4 SV=2	268.1	247.6	94.5	106.8	132.6	126.5	119.2
E2QX06	Uncharacterized protein OS=Canis lupus familiaris GN=TKTL1 PE=4 SV=1	657	253	256.6	209.2	228.3	196.2	190.7
E2QX33	Uncharacterized protein OS=Canis lupus familiaris GN=CC2D1A PE=4 SV=1	87.3	127.3	93.3	82	79	52.3	115.8
E2QX53	Glucosamine-6-phosphate isomerase OS=Canis lupus familiaris GN=GNPDA1 PE=3 SV=1	291.5	285.2	305.8	326.3	301.4	319.4	349.8
E2QX73	Uncharacterized protein OS=Canis lupus familiaris GN=HMGCS1 PE=4 SV=1	661.4	230.5	102.9	106.8	108.4	104.9	142
E2QX78	Uncharacterized protein OS=Canis lupus familiaris GN=SLC43A3 PE=4 SV=1	203.1	286.8	309.4	300.8	306.4	457.5	323.6
E2QX84	Uncharacterized protein OS=Canis lupus familiaris GN=HSPA2 PE=3 SV=1	1427.7	924.2	558.5	517.3	650.1	521.1	714.4
E2QX86	Uncharacterized protein OS=Canis lupus familiaris GN=SMARCE1 PE=4 SV=2	79.1	53.7	106.4	111.3	129.3	154.2	109.9
E2QXA1	Uncharacterized protein OS=Canis lupus familiaris GN=AKAP5 PE=4 SV=1	196.5	340.5	98.2	126.6	129.2	63.2	154.6
E2QXA3	Uncharacterized protein OS=Canis lupus familiaris GN=ACADVL PE=3 SV=2	538.5	434.7	480.9	562.2	521.4	716.5	532.6
E2QXA5	Uncharacterized protein OS=Canis lupus familiaris GN=TMSB10 PE=4 SV=1	312.5	163.9	140.6	128.3	127.2	119.5	109.1
E2QXB1	Uncharacterized protein OS=Canis lupus familiaris GN=SIGLEC1 PE=4 SV=2	187.7	162.8	281.9	243.1	225.8	220.2	275.4
E2QXB6	Uncharacterized protein OS=Canis lupus familiaris GN=LACTB2 PE=4 SV=1	185	162.1	84	89.7	98.3	109.6	106
E2QXC6	Uncharacterized protein OS=Canis lupus familiaris GN=CBX3 PE=4 SV=2	215.7	152.5	252.8	251.6	293.3	251.7	280.3
E2QXD1	Annexin OS=Canis lupus familiaris GN=ANXA7 PE=3 SV=2	695.7	641.9	805.7	802.4	877.8	854.6	773
E2QXD6	Uncharacterized protein OS=Canis lupus familiaris PE=4 SV=2	877	640.2	585.1	552.6	522.5	527.7	523.7
E2QXE0	Serine/threonine-protein phosphatase OS=Canis lupus familiaris GN=PPP1CC PE=3 SV=1	330.7	219	169.6	168.4	228.3	255.8	192.9
E2QXE3	Uncharacterized protein OS=Canis lupus familiaris GN=MPHOSPH8 PE=4 SV=2	1483.8	137.3	125.6	147.2	131.3	180.5	105.3
E2QXF0	Uncharacterized protein OS=Canis lupus familiaris GN=FOLR2 PE=4 SV=1	218.7	145.2	331.5	306.1	395	382.4	389.1
E2QXF2	Uncharacterized protein OS=Canis lupus familiaris GN=LGMN PE=4 SV=1	67	42.4	82.3	71	75.7	55.6	72.4
E2QXF3	60S ribosomal protein L15 OS=Canis lupus familiaris GN=RPL15 PE=1 SV=1	155.1	148.5	191.2	169.5	212.6	204.5	224.9
E2QXH2	Uncharacterized protein OS=Canis lupus familiaris GN=PSPC1 PE=4 SV=2	788.5	536	369	333.2	431	294.5	539.5
E2QXH3	Uncharacterized protein OS=Canis lupus familiaris GN=TINAGL1 PE=3 SV=1	78.6	93.4	286.4	224.9	239.1	155.8	225.3
E2QXI3	Uncharacterized protein OS=Canis lupus familiaris GN=AIMP1 PE=4 SV=2	576.5	463	334.5	317.9	343.2	349.7	363.2
E2QXJ5	V-type proton ATPase subunit a OS=Canis lupus familiaris GN=TCIRG1 PE=3 SV=1	174.3	88	144.5	188.2	198.2	288.2	144.8
E2QXK0	Uncharacterized protein OS=Canis lupus familiaris GN=HEPACAM PE=4 SV=2	279.4	353.4	85.6	82.4	95.7	92.1	92.1
E2QXK6	Galectin OS=Canis lupus familiaris GN=LGALS9 PE=4 SV=2	305.6	312.2	310.9	352	365.4	418	531.4
E2QXL2	Uncharacterized protein OS=Canis lupus familiaris GN=DNM1L PE=3 SV=2	611.2	503.9	376.5	442.5	422	400.8	375.5
E2QXN8	Annexin OS=Canis lupus familiaris GN=ANXA11 PE=3 SV=1	687	700	687	801.4	752.5	837.5	714.9
E2QXP3	Uncharacterized protein OS=Canis lupus familiaris GN=RNPEP PE=4 SV=2	372.8	250.9	266.1	284.7	254.9	284.6	374
E2QXQ5	Uncharacterized protein OS=Canis lupus familiaris GN=DAGLB PE=4 SV=1	157.3	120.5	115.8	125.6	106.2	120.1	81.5
E2QXQ9	Uncharacterized protein OS=Canis lupus familiaris GN=TMOD1 PE=4 SV=1	165.5	203.7	249.4	205.3	200.7	126.8	227.1
E2QXR8	Uncharacterized protein OS=Canis lupus familiaris GN=RBBP4 PE=4 SV=1	181.6	140.9	464.8	382.3	384.9	365	408
E2QXS7	Adenosylhomocysteinase OS=Canis lupus familiaris GN=AHCY PE=3 SV=2	1030.3	1038.3	1025.1	1158.8	1115.4	1056.9	1253
E2QXU3	Uncharacterized protein OS=Canis lupus familiaris PE=4 SV=2	336.3	297.7	434	469.6	578.9	392.6	473
E2QXU5	Uncharacterized protein OS=Canis lupus familiaris GN=SF3A3 PE=4 SV=1	203.2	186.6	264.6	232.7	291.3	281.4	292.1
E2QXV1	Uncharacterized protein OS=Canis lupus familiaris GN=HCFC1 PE=4 SV=2	213.6	199.7	291.2	236.1	324.5	257.2	351.7
E2QXV5	Uncharacterized protein OS=Canis lupus familiaris GN=AP3D1 PE=4 SV=2	178	158.5	219.8	195.6	226.5	201.8	190.3
E2QXY7	Uncharacterized protein OS=Canis lupus familiaris GN=ACTR2 PE=3 SV=2	417.9	391.1	487.1	555.1	502.6	591.9	487.7
E2QXZ2	Uncharacterized protein OS=Canis lupus familiaris GN=SART3 PE=4 SV=2	95.1	42.6	109.8	110.5	141.6	142.1	93.3
E2QY03	Uncharacterized protein OS=Canis lupus familiaris GN=EPB41L1 PE=4 SV=2	192.1	826	194	226.8	225.8	152.4	241.7
E2QY08	Uncharacterized protein OS=Canis lupus familiaris GN=ACTN1 PE=4 SV=2	1729.1	1072.9	1281.1	1524.1	1481.6	1562.2	1365.7
E2QY23	Uncharacterized protein OS=Canis lupus familiaris GN=ERLIN2 PE=4 SV=1	437.6	540.3	550.4	527.9	535	469.7	498.3
E2QY26	Uncharacterized protein OS=Canis lupus familiaris GN=HSPA12B PE=4 SV=1	103.4	83.8	95.2	113.6	106	108.9	93.3
E2QY30	Uncharacterized protein OS=Canis lupus familiaris GN=HMGB2 PE=4 SV=1	165.6	173.2	432.2	300.6	494.8	414.7	506.2
E2QY31	Platelet-activating factor acetylhydrolase IB subunit alpha OS=Canis lupus familiaris GN=PAFAH1B1 PE=3 SV=1	872.9	689.1	473.6	481.2	474.4	453.2	498.6
E2QY43	Uncharacterized protein OS=Canis lupus familiaris GN=PSMD8 PE=4 SV=2	245.5	227.7	289.2	373	369.8	388.4	259
E2QY59	Uncharacterized protein OS=Canis lupus familiaris GN=RNF115 PE=4 SV=2	36.7	68.7	35	33.9	40.8	36.2	52.2
E2QY64	Uncharacterized protein OS=Canis lupus familiaris GN=BTD PE=4 SV=2	354.6	195	231.1	211.1	222.7	176.9	278.9
E2QY83	Uncharacterized protein OS=Canis lupus familiaris GN=ITGBL1 PE=4 SV=2	229.4	129.4	230.3	286.9	280.3	175.8	341.4
E2QY85	Uncharacterized protein OS=Canis lupus familiaris GN=LOC607207 PE=4 SV=2	257.2	301.6	508.1	538.1	556	414.8	611.7
E2QY93	Nicalin OS=Canis lupus familiaris GN=NCLN PE=3 SV=1	164.9	130.3	130.8	134	152.2	133.1	113.8
E2QY95	Uncharacterized protein OS=Canis lupus familiaris GN=DDX39A PE=4 SV=1	218	176.4	326.3	324.6	370.5	338	314.5
E2QYC2	Tubulin beta chain OS=Canis lupus familiaris GN=TUBB6 PE=3 SV=1	350.6	330.4	498.1	528.8	520.4	472.9	430.7
E2QYD2	Uncharacterized protein OS=Canis lupus familiaris GN=ETFB PE=4 SV=2	293.5	405.7	269.3	284.7	308.1	304.9	301.6
E2QYD3	Uncharacterized protein OS=Canis lupus familiaris GN=BCKDHB PE=4 SV=2	233.1	161.8	234.4	228.4	210.9	191.2	224.6
E2QYD8	Uncharacterized protein OS=Canis lupus familiaris GN=RPL35A PE=4 SV=1	452.5	320	264.4	196.4	231.1	217.1	230.2
E2QYF3	Uncharacterized protein OS=Canis lupus familiaris GN=AFG3L2 PE=3 SV=2	78.6	119.2	118.1	107.7	118.1	108.2	117.8
E2QYG1	Periostin OS=Canis lupus familiaris GN=POSTN PE=2 SV=2	92.5	79.2	338.8	243.3	292.4	168.2	371.3
E2QYG5	Uncharacterized protein OS=Canis lupus familiaris GN=P3H4 PE=4 SV=1	111.8	88.1	101	96.9	110.4	112.4	85.1
E2QYG6	Uncharacterized protein OS=Canis lupus familiaris GN=ATP6V1A PE=3 SV=1	961.3	809.3	432.2	504.3	443.7	632.8	434.5
E2QYH6	Uncharacterized protein OS=Canis lupus familiaris GN=SAFB PE=4 SV=2	182.1	155.5	284.7	331	338.6	371.6	371.3
E2QYI0	Uncharacterized protein OS=Canis lupus familiaris GN=SFRP4 PE=4 SV=1	287.6	312.9	753.7	833.2	999	453.1	1088.8
E2QYI2	Uncharacterized protein OS=Canis lupus familiaris GN=NECAP2 PE=4 SV=2	324	342	325.3	338.7	350.8	283	406.5
E2QYJ3	Uncharacterized protein OS=Canis lupus familiaris GN=SNX1 PE=4 SV=1	547.9	404.5	258.4	328.5	347.7	393.1	320.6
E2QYK6	Uncharacterized protein OS=Canis lupus familiaris GN=CBX5 PE=4 SV=1	160.3	137.1	329.3	316.7	319.2	229.8	366.1
E2QYL0	Uncharacterized protein OS=Canis lupus familiaris GN=TMED10 PE=3 SV=2	82.9	73.4	199.4	216.8	221.8	262.2	181.9
E2QYM4	Uncharacterized protein OS=Canis lupus familiaris GN=CLCC1 PE=4 SV=2	70.5	28.3	107.4	74.2	92.5	84.9	58
E2QYM7	Uncharacterized protein OS=Canis lupus familiaris GN=THBS3 PE=4 SV=1	679	666.1	619.9	599.7	659.5	498.2	880.1
E2QYN0	Uncharacterized protein OS=Canis lupus familiaris GN=TBCB PE=4 SV=2	464.7	890.4	483.5	514.3	486.5	468.4	501.8
E2QYN4	Uncharacterized protein OS=Canis lupus familiaris GN=ATPIF1 PE=4 SV=1	146.3	210.3	126.5	109.1	122.9	124.5	147.3
E2QYP0	Uncharacterized protein OS=Canis lupus familiaris GN=NEK9 PE=4 SV=1	180	125.1	84.9	84.2	108.7	121.1	76
E2QYP1	Uncharacterized protein OS=Canis lupus familiaris GN=HNRNPA1 PE=4 SV=2	185.2	248.9	326.5	292.8	370.2	304.6	417
E2QYP9	Uncharacterized protein OS=Canis lupus familiaris GN=CDT1 PE=4 SV=2	351.1	371.8	179.9	185.2	208.8	225.9	247.3
E2QYQ4	Uncharacterized protein OS=Canis lupus familiaris GN=CMAS PE=4 SV=1	338.8	221.2	282.8	304.2	292.9	308.3	302.3
E2QYQ9	Uncharacterized protein OS=Canis lupus familiaris GN=PFAS PE=3 SV=1	320.3	252.6	225.8	189.8	212.2	170.5	191.1
E2QYS4	Pantetheinase OS=Canis lupus familiaris GN=VNN1 PE=4 SV=2	584.2	551.9	1399.9	1655.4	1703.8	879.3	2159.5
E2QYU2	Clusterin OS=Canis lupus familiaris GN=CLU PE=3 SV=1	469.6	385.2	885.1	731	701.3	595.2	723
E2QYX1	Phosphoglycerate mutase OS=Canis lupus familiaris GN=BPGM PE=3 SV=1	458	314.8	647.7	561.4	515.3	407.5	459.7
E2QZ05	Uncharacterized protein OS=Canis lupus familiaris GN=DCTN2 PE=4 SV=1	494.6	507.6	385.7	421.1	405.1	352.3	415.3
E2QZ11	Uncharacterized protein OS=Canis lupus familiaris GN=MXRA8 PE=4 SV=1	85.2	54.1	96	109.7	96.1	60.1	129.4
E2QZ13	Uncharacterized protein OS=Canis lupus familiaris GN=PAPSS1 PE=3 SV=1	283.6	250.7	214.6	263	230	225.8	222.8
E2QZ37	Uncharacterized protein OS=Canis lupus familiaris GN=MIEN1 PE=4 SV=1	110.5	166.9	70.5	54.6	58.3	56.7	56
E2QZ50	Adenylyl cyclase-associated protein OS=Canis lupus familiaris GN=CAP1 PE=3 SV=1	824	720.2	692.8	805.5	762.2	814.9	777.2
E2QZ69	Uncharacterized protein OS=Canis lupus familiaris GN=HARS PE=3 SV=1	983.2	682.2	424.5	505.3	490.7	456.3	494.3
E2QZA1	MICOS complex subunit MIC13 OS=Canis lupus familiaris GN=C19orf70 PE=3 SV=1	298.6	318.7	315.8	282.4	297.6	246.4	311.1
E2QZA8	Peptidylprolyl isomerase OS=Canis lupus familiaris GN=FKBP10 PE=4 SV=1	511.5	460	758.8	895.6	869.9	706.5	990.8
E2QZB3	Uncharacterized protein OS=Canis lupus familiaris GN=HSPBP1 PE=4 SV=1	226.7	264.2	99.3	120.5	119.3	170.7	151.9
E2QZE7	Uncharacterized protein OS=Canis lupus familiaris GN=ADD3 PE=4 SV=1	480.5	461.2	450.3	459	596.8	321.6	494.5
E2QZG2	Uncharacterized protein OS=Canis lupus familiaris GN=LOC106558887 PE=3 SV=1	718.1	681.6	635.3	589.9	627.6	753.1	647.3
E2QZL5	Uncharacterized protein OS=Canis lupus familiaris GN=VPS16 PE=4 SV=2	250.3	276.6	298.4	310.4	333.6	403.3	284.4
E2QZN8	Uncharacterized protein OS=Canis lupus familiaris GN=PTX3 PE=4 SV=1	81.5	47.6	130.2	126	137.3	105.4	122.9
E2QZQ1	Uncharacterized protein OS=Canis lupus familiaris GN=TF PE=3 SV=1	456.3	377	1163	1062.2	971.2	886.9	851
E2QZQ6	Uncharacterized protein OS=Canis lupus familiaris GN=CPNE3 PE=4 SV=1	441.4	400.4	377.4	429.9	392.1	979.8	383.1
E2QZR6	Uncharacterized protein OS=Canis lupus familiaris GN=HBS1L PE=4 SV=2	408.9	259.5	262.2	340.1	292.4	412.7	229.2
E2QZS4	Uncharacterized protein OS=Canis lupus familiaris PE=4 SV=2	279.7	402.2	219.3	263	216.6	141.7	222.6
E2QZT4	Uncharacterized protein OS=Canis lupus familiaris GN=BSG PE=4 SV=1	307	391.2	377.2	402.3	385.5	359.9	404.2
E2QZT8	Uncharacterized protein OS=Canis lupus familiaris GN=SLC2A5 PE=3 SV=1	80.1	164.8	100.8	87.9	105.4	81.3	150.9
E2QZU1	Golgi apparatus membrane protein TVP23 homolog OS=Canis lupus familiaris GN=TVP23B PE=3 SV=2	282.1	138.3	256	289.6	239.2	440.3	250.1
E2QZU3	Uncharacterized protein OS=Canis lupus familiaris GN=UBAC1 PE=4 SV=1	381.5	298.7	292.5	376	290.3	266.9	230.9
E2QZV2	Uncharacterized protein OS=Canis lupus familiaris GN=DDRGK1 PE=4 SV=2	331.2	193.8	218.9	279.6	275.9	442.6	296.3
E2QZV5	Uncharacterized protein OS=Canis lupus familiaris GN=PRKAR1A PE=4 SV=1	135.7	168.4	122.9	151.7	170.7	144.6	134.4
E2R002	Uncharacterized protein OS=Canis lupus familiaris GN=PTGR1 PE=4 SV=2	787.5	828.6	810.7	871.5	792.8	777.4	902.3
E2R020	Uncharacterized protein OS=Canis lupus familiaris GN=RHOG PE=3 SV=2	776.3	918.3	591.8	598.9	591.8	596.9	629.8
E2R057	Uncharacterized protein OS=Canis lupus familiaris GN=ARFIP1 PE=4 SV=2	37.5	53	40.3	46.9	44.5	57.2	45.4
E2R071	Uncharacterized protein OS=Canis lupus familiaris GN=GIPC1 PE=4 SV=1	147	117.6	78	90.7	92	96.8	90.3
E2R073	Uncharacterized protein OS=Canis lupus familiaris GN=GDAP1 PE=4 SV=1	286.3	229.3	45.9	38.1	49.7	38.6	52.4
E2R081	Uncharacterized protein OS=Canis lupus familiaris GN=SERPINB10 PE=3 SV=1	254.8	176.2	429.9	483.1	397.9	254.1	253.6
E2R095	5'-nucleotidase OS=Canis lupus familiaris GN=NT5C3B PE=3 SV=2	673.2	714.6	758.8	930.9	756.2	637.5	1047.5
E2R097	Uncharacterized protein OS=Canis lupus familiaris GN=XPNPEP1 PE=3 SV=2	379.6	313.4	252.1	277.7	284.9	279.7	390.6
E2R0A0	Uncharacterized protein OS=Canis lupus familiaris GN=FAM213A PE=4 SV=2	495	487.6	145.8	172.5	143.8	157.3	143.7
E2R0A6	Uncharacterized protein OS=Canis lupus familiaris GN=RPL28 PE=4 SV=1	286	288.9	186.8	165	190.3	138.8	231.4
E2R0B6	Proteasome subunit beta type OS=Canis lupus familiaris GN=PSMB6 PE=3 SV=1	300.5	274.6	273.1	287.9	257	250.5	280.7
E2R0C4	Uncharacterized protein OS=Canis lupus familiaris PE=4 SV=1	294.7	383.3	320.8	287.9	270.1	388.3	288.4
E2R0C6	Uncharacterized protein OS=Canis lupus familiaris GN=ACSS2 PE=4 SV=2	194.1	198.3	165.9	206.2	197	236.6	183.4
E2R0D6	Proliferating cell nuclear antigen OS=Canis lupus familiaris GN=PCNA PE=3 SV=1	132.9	231.8	195.3	175.4	203.7	203.5	214.2
E2R0F2	Uncharacterized protein OS=Canis lupus familiaris GN=FLNB PE=4 SV=2	1511.5	1329.9	1932.2	2425.6	2143.6	1490.5	1987.7
E2R0G3	Uncharacterized protein OS=Canis lupus familiaris GN=U2AF2 PE=4 SV=2	222.1	208.4	423.7	525.7	527.2	397.7	425.8
E2R0G8	Uncharacterized protein OS=Canis lupus familiaris GN=PPCS PE=4 SV=1	197.2	142.8	72.9	75.7	89.8	101.7	85.6
E2R0H0	Uncharacterized protein OS=Canis lupus familiaris GN=DLST PE=4 SV=1	602.8	435.6	370.5	393.2	403.6	418	348.5
E2R0I8	Glucosylceramidase OS=Canis lupus familiaris GN=GBA PE=3 SV=1	272.2	208.7	296.9	258.2	261.5	552.4	227.2
E2R0I9	Glucose-6-phosphate 1-dehydrogenase OS=Canis lupus familiaris GN=G6PD PE=3 SV=2	808.9	683.5	695.3	683.7	616.6	611.9	463
E2R0J6	Serine/threonine-protein phosphatase 2A 55 kDa regulatory subunit B OS=Canis lupus familiaris GN=PPP2R2A PE=3 SV=2	247.4	366.9	201.3	200.9	220.4	212.1	234.5
E2R0K4	Uncharacterized protein OS=Canis lupus familiaris GN=RAB14 PE=4 SV=1	318.3	262	303	321.2	374.4	298.9	345.3
E2R0K5	Uncharacterized protein OS=Canis lupus familiaris GN=SSR3 PE=4 SV=1	30.2	14.5	69	76.7	80.6	122.2	53.3
E2R0L3	Uncharacterized protein OS=Canis lupus familiaris GN=UBL4A PE=4 SV=2	65.9	114.8	80.8	86.5	91.5	81	78.4
E2R0L6	Uncharacterized protein OS=Canis lupus familiaris GN=FCGRT PE=3 SV=2	112.4	126.4	272.3	318.9	289.7	247.6	362.6
E2R0L9	Uncharacterized protein OS=Canis lupus familiaris GN=TCP1 PE=3 SV=1	467.2	463.1	378.4	396	380.2	357.7	371.3
E2R0N3	Annexin OS=Canis lupus familiaris GN=ANXA3 PE=3 SV=1	487.8	429.2	281.5	363.6	305.8	351	342.8
E2R0P3	Uncharacterized protein OS=Canis lupus familiaris GN=ISOC1 PE=4 SV=1	557.6	572	296.1	304.4	299.3	335.6	351.7
E2R0Q0	Chloride channel protein OS=Canis lupus familiaris GN=CLCN7 PE=3 SV=2	93.4	105.3	103.8	119.3	98.9	627.9	95.2
E2R0R1	Uncharacterized protein OS=Canis lupus familiaris GN=PSMD9 PE=4 SV=2	191.4	193.4	357.2	375.8	307.5	248.3	309.9
E2R0S6	Annexin OS=Canis lupus familiaris PE=3 SV=2	636.8	454.7	369	322.8	392.7	270.4	349.3
E2R0S9	Uncharacterized protein OS=Canis lupus familiaris GN=FAM114A1 PE=4 SV=2	407.7	287.2	532	572.2	544.1	513.4	655.8
E2R0T6	Uncharacterized protein OS=Canis lupus familiaris GN=HSPA8 PE=3 SV=1	4520.4	4073.5	2217.2	2146.8	2275.1	2317.3	2400.7
E2R0V0	Uncharacterized protein OS=Canis lupus familiaris GN=BCL2L13 PE=4 SV=2	267.4	178.3	237.3	269.2	267.7	360.5	254.8
E2R0X3	Uncharacterized protein OS=Canis lupus familiaris GN=PRPS2 PE=3 SV=1	206.7	198.2	112.6	122.6	159.3	150.2	164.4
E2R0Y5	Succinate--CoA ligase [ADP/GDP-forming] subunit alpha, mitochondrial OS=Canis lupus familiaris GN=SUCLG1 PE=3 SV=1	1016.2	1621.6	846	668.4	809.4	902.6	995
E2R109	Uncharacterized protein OS=Canis lupus familiaris GN=C8A PE=4 SV=1	259.7	322.3	566.5	530.8	547.9	398.4	663.3
E2R119	Uncharacterized protein OS=Canis lupus familiaris PE=3 SV=1	135.9	114.2	143.4	141.5	159.7	178.9	149.7
E2R120	Cytosolic Fe-S cluster assembly factor NUBP1 OS=Canis lupus familiaris GN=NUBP1 PE=3 SV=1	20	56.3	24	23.2	29.9	26.5	32.9
E2R125	Perilipin OS=Canis lupus familiaris GN=PLIN3 PE=3 SV=1	921.6	1511.7	808.1	856.8	847.3	896	911.1
E2R129	Uncharacterized protein OS=Canis lupus familiaris GN=TCEB1 PE=3 SV=2	474.8	346.6	366.6	353.8	372.4	326.5	401.3
E2R134	Uncharacterized protein OS=Canis lupus familiaris GN=CNDP2 PE=4 SV=2	602.7	902.3	516.7	523.7	516	635.7	529.5
E2R141	Uncharacterized protein OS=Canis lupus familiaris GN=C8B PE=4 SV=1	352.9	239.8	798.2	689.8	656.2	543.3	1018.3
E2R149	Uncharacterized protein OS=Canis lupus familiaris GN=RPL9 PE=4 SV=1	154.3	205.6	228.8	183.5	231.9	163.7	269.1
E2R151	Uncharacterized protein OS=Canis lupus familiaris GN=SYNM PE=3 SV=2	367.8	282.5	263.5	296.5	287	429.4	254
E2R185	Phosphatidate cytidylyltransferase OS=Canis lupus familiaris GN=CDS2 PE=3 SV=2	175.1	151.7	137.6	209	178.5	242.3	151.2
E2R1A0	Uncharacterized protein OS=Canis lupus familiaris GN=YBX1 PE=4 SV=2	129.6	152.5	241.8	180.7	215	207	255.3
E2R1A6	Cytochrome b-c1 complex subunit Rieske, mitochondrial OS=Canis lupus familiaris GN=UQCRFS1 PE=4 SV=1	298.3	258.5	206.7	195.1	213.1	224.9	144.2
E2R1C9	Uncharacterized protein OS=Canis lupus familiaris GN=TMOD2 PE=4 SV=2	475.7	618	464.8	512.8	479.8	323.3	545.6
E2R1D1	Uncharacterized protein OS=Canis lupus familiaris GN=GMPPA PE=4 SV=1	89.9	59	167.2	142.5	146.6	125.2	108.4
E2R1D2	Uncharacterized protein OS=Canis lupus familiaris GN=VPS53 PE=4 SV=1	198.2	128.3	109.3	118.7	112.1	123.2	88.4
E2R1E3	Uncharacterized protein OS=Canis lupus familiaris GN=PAPSS2 PE=3 SV=1	166.8	151.4	257.1	286.9	274.6	258.8	213.2
E2R1J6	Eukaryotic translation initiation factor 3 subunit E OS=Canis lupus familiaris GN=EIF3E PE=3 SV=1	203.7	143.5	190.2	220.2	221.3	250.3	186.6
E2R1K6	Sodium/potassium-transporting ATPase subunit beta OS=Canis lupus familiaris GN=ATP1B2 PE=3 SV=1	648.7	861.5	289.2	291.2	298.4	259.8	286.8
E2R1M6	Uncharacterized protein OS=Canis lupus familiaris GN=PHPT1 PE=4 SV=2	200.6	250.7	215.3	202.1	212.5	185.6	213.2
E2R1N1	Uncharacterized protein OS=Canis lupus familiaris GN=YOD1 PE=4 SV=1	311.9	157.1	402.5	380.9	336.1	218.6	334.9
E2R1N7	Uncharacterized protein OS=Canis lupus familiaris GN=PCYOX1 PE=3 SV=1	237.2	128.7	185.9	251.4	253.5	292.9	232
E2R1P6	Uncharacterized protein OS=Canis lupus familiaris PE=4 SV=2	1086.1	796.5	2526.8	2418	1800.3	1340.4	1420.8
E2R1P9	Methionine aminopeptidase 2 OS=Canis lupus familiaris GN=METAP2 PE=3 SV=2	392.3	266.5	241	302	273.1	332	258.2
E2R1R4	Uncharacterized protein OS=Canis lupus familiaris GN=ATP6V1E1 PE=3 SV=1	444.9	619.9	231.8	244.1	238.7	265.7	226.8
E2R1T2	Uncharacterized protein OS=Canis lupus familiaris GN=MECR PE=4 SV=1	96.8	56	44.8	62.4	54.1	69.2	59.4
E2R1V2	Uncharacterized protein OS=Canis lupus familiaris GN=CUL1 PE=3 SV=2	442.7	460.4	335.1	399.5	362.9	448.1	338
E2R1X7	Uncharacterized protein OS=Canis lupus familiaris GN=CDC42BPA PE=3 SV=2	138.5	110.1	94.6	114.2	106.2	98.1	88.8
E2R1X9	Uncharacterized protein OS=Canis lupus familiaris GN=GAP43 PE=4 SV=1	2821	2187.8	676.5	666.4	797.7	621.5	940.6
E2R1Z0	Uncharacterized protein OS=Canis lupus familiaris GN=FHL1 PE=4 SV=2	1190	1062.1	2536.5	1344	1882.6	1819.7	2223.6
E2R1Z7	Uncharacterized protein OS=Canis lupus familiaris GN=PPP6R3 PE=4 SV=1	202.5	126.2	79.5	130.1	117.7	159	85.8
E2R210	Uncharacterized protein OS=Canis lupus familiaris PE=3 SV=2	273.1	337.2	255.1	197	179.7	186.5	226.8
E2R238	Uncharacterized protein OS=Canis lupus familiaris GN=SMTNL1 PE=4 SV=2	165.2	74.9	135.3	146.4	150.4	821.5	148.7
E2R260	Uncharacterized protein OS=Canis lupus familiaris GN=SHOC2 PE=4 SV=1	576	443.1	547	499.2	792.4	406	484.9
E2R266	Uncharacterized protein OS=Canis lupus familiaris GN=MYO9B PE=4 SV=2	101.1	118.1	112.1	117.3	139.3	139.1	126.3
E2R268	Uncharacterized protein OS=Canis lupus familiaris GN=PDHB PE=4 SV=1	833.4	768.8	452.2	402.7	455.8	588.5	435.9
E2R273	Uncharacterized protein OS=Canis lupus familiaris GN=SH3GL1 PE=4 SV=2	605.8	621.6	122.8	140.1	145.6	144.3	141.7
E2R2C3	Glucose-6-phosphate isomerase OS=Canis lupus familiaris GN=GPI PE=3 SV=1	2819.1	2116.3	991.8	1126.2	1044.3	1256.4	1042.1
E2R2G5	Peptidylprolyl isomerase OS=Canis lupus familiaris GN=AIP PE=4 SV=1	330.6	430.5	204.3	218.2	227.4	206.8	262.8
E2R2I1	Uncharacterized protein OS=Canis lupus familiaris GN=TOMM20 PE=3 SV=1	71.2	54.7	38.2	44.3	56.6	87.4	37.1
E2R2I4	Uncharacterized protein OS=Canis lupus familiaris GN=FAF2 PE=4 SV=1	461.7	254.7	224.3	264.7	251.2	266.2	239.3
E2R2I5	Uncharacterized protein OS=Canis lupus familiaris GN=UBE2V1 PE=3 SV=1	419.2	551	310.7	365.8	333.9	315.2	341.8
E2R2K4	Uncharacterized protein OS=Canis lupus familiaris GN=RAP1B PE=4 SV=1	511.3	528	474.3	418.2	462.7	395.9	597
E2R2N2	Mitogen-activated protein kinase OS=Canis lupus familiaris GN=MAPK1 PE=3 SV=1	453.3	460.6	293.5	301	305.2	269.5	314.3
E2R2S3	Guanine nucleotide-binding protein subunit gamma OS=Canis lupus familiaris GN=GNG7 PE=3 SV=1	119	232.1	123.7	92	95.6	68.1	106.3
E2R2S8	Uncharacterized protein OS=Canis lupus familiaris GN=GNB4 PE=4 SV=1	438	448.9	341.8	363	355.1	320.1	447.5
E2R2U3	Uncharacterized protein OS=Canis lupus familiaris GN=DHX15 PE=4 SV=1	277.9	195.9	313.3	318.5	335.4	394.5	260.7
E2R2V4	Uncharacterized protein OS=Canis lupus familiaris GN=THOP1 PE=3 SV=1	907.5	744.3	516.9	583.4	595.1	630.9	552.8
E2R2W6	Uncharacterized protein OS=Canis lupus familiaris GN=SBDS PE=4 SV=1	581.7	453.6	454.1	451.7	394.5	361.3	379.7
E2R302	Aminopeptidase OS=Canis lupus familiaris GN=ERAP1 PE=3 SV=1	228.3	151.6	262.6	298.7	292.1	330.6	297
E2R311	UDP-glucose 6-dehydrogenase OS=Canis lupus familiaris GN=UGDH PE=3 SV=1	636.8	394.8	570.7	784.7	686	793	639.5
E2R326	Mothers against decapentaplegic homolog OS=Canis lupus familiaris GN=SMAD9 PE=3 SV=1	428	168.1	149.6	224.1	192.7	221.8	184.1
E2R3D3	Uncharacterized protein OS=Canis lupus familiaris PE=3 SV=1	116	176.5	156.3	94.6	130.2	104.6	163.5
E2R3F9	Uncharacterized protein OS=Canis lupus familiaris GN=ABCF1 PE=4 SV=2	154.4	122.8	123.1	131.1	152.1	164	137.9
E2R3G3	Protein-L-isoaspartate O-methyltransferase OS=Canis lupus familiaris GN=PCMT1 PE=3 SV=1	364.9	580.6	258.4	246.9	298.1	247	248
E2R3H9	Microtubule-associated protein OS=Canis lupus familiaris GN=MAPT PE=4 SV=2	573.2	1282.4	343	332.6	330.4	377.5	407.9
E2R3I8	Uncharacterized protein OS=Canis lupus familiaris GN=CRYZ PE=4 SV=2	247.9	1138.6	191.2	225.7	211.7	173	231.7
E2R3J1	Uncharacterized protein OS=Canis lupus familiaris GN=EIF4A2 PE=3 SV=1	812	668.8	665.1	669	681.5	744.9	712.1
E2R3J3	Uncharacterized protein OS=Canis lupus familiaris GN=GNAZ PE=4 SV=1	527.1	919.5	481.8	397.4	461.5	354.8	442.9
E2R3J4	Uncharacterized protein OS=Canis lupus familiaris GN=CFAP20 PE=4 SV=1	127.3	163.7	135.1	131.9	131.9	101.3	164.1
E2R3L3	Uncharacterized protein OS=Canis lupus familiaris GN=AAK1 PE=4 SV=2	520.1	391.9	358.7	368.5	386.3	342.1	359.1
E2R3M9	Mitofusin 2 OS=Canis lupus familiaris GN=MFN2 PE=2 SV=1	699.4	751.5	336.4	362.8	400.1	393.7	325.7
E2R3P8	Uncharacterized protein OS=Canis lupus familiaris GN=GGPS1 PE=3 SV=2	356.2	337.7	186.5	183.3	390.3	294	185.1
E2R3Q3	Scavenger receptor class A member 5 OS=Canis lupus familiaris GN=SCARA5 PE=3 SV=1	51.1	38	159.5	151.5	148.1	131.8	98.9
E2R3Q7	Uncharacterized protein OS=Canis lupus familiaris PE=4 SV=2	81.6	55	53.2	80.1	86.8	70.7	78
E2R3R2	Proteasome subunit beta type OS=Canis lupus familiaris GN=PSMB5 PE=3 SV=1	680.5	513.1	519.7	519.6	450.2	585.1	443.3
E2R3T9	Uncharacterized protein OS=Canis lupus familiaris PE=3 SV=1	417.1	369.9	674.1	658.4	682.9	657.1	704.1
E2R3U9	Uncharacterized protein OS=Canis lupus familiaris GN=MAGED2 PE=4 SV=1	340.2	246.6	256.2	278.8	298	266.3	255.3
E2R3V7	Uncharacterized protein OS=Canis lupus familiaris GN=MAVS PE=4 SV=2	105.7	79.2	72.7	107.3	103	106.5	83.2
E2R3Z4	Uncharacterized protein OS=Canis lupus familiaris GN=NIPSNAP3A PE=4 SV=2	291.6	220.4	256	237	230	209.5	248.4
E2R413	Uncharacterized protein OS=Canis lupus familiaris GN=CAPG PE=4 SV=2	327.2	398.3	734.6	543.4	658.3	526.7	734.7
E2R416	Uncharacterized protein OS=Canis lupus familiaris GN=LUM PE=4 SV=1	555.9	431.1	1436.3	1613.2	1261	1217.5	2121.7
E2R427	Uncharacterized protein OS=Canis lupus familiaris GN=ARHGEF7 PE=4 SV=2	228.2	180.3	197	239	256.1	221.1	224.4
E2R431	S-adenosylmethionine synthase OS=Canis lupus familiaris GN=MAT2A PE=3 SV=1	728.7	918.1	532	576.3	574.3	750.5	623.6
E2R434	Uncharacterized protein OS=Canis lupus familiaris GN=CTNND1 PE=4 SV=2	160.4	207.5	175.2	211.7	195	247.1	170
E2R451	Uncharacterized protein OS=Canis lupus familiaris GN=MPP6 PE=4 SV=2	304.6	260	213.5	235.3	259.2	176.7	298.1
E2R464	Uncharacterized protein OS=Canis lupus familiaris GN=MZB1 PE=4 SV=2	378	205.6	225.1	234.3	247.9	298.5	286.2
E2R471	Uncharacterized protein OS=Canis lupus familiaris GN=CRYL1 PE=4 SV=2	103.3	109.9	100.3	119.5	126.9	143.3	141
E2R479	Uncharacterized protein OS=Canis lupus familiaris GN=CSTF3 PE=4 SV=1	282.4	352.9	450.7	427	496.3	397.1	445.1
E2R480	Uncharacterized protein OS=Canis lupus familiaris GN=NPNT PE=4 SV=2	29.4	22.7	231.8	265.9	241.1	43.4	84.9
E2R490	Uncharacterized protein OS=Canis lupus familiaris GN=ABCA9 PE=4 SV=1	330.1	392	490.3	405.6	442.6	384.9	532.9
E2R4A5	Uncharacterized protein OS=Canis lupus familiaris GN=RAD23B PE=4 SV=2	180.8	216.4	203.7	229.4	222.3	234.4	258.1
E2R4C1	Uncharacterized protein OS=Canis lupus familiaris GN=M6PR PE=4 SV=1	183.9	176.4	287.1	331	301	389.6	295.6
E2R4C5	Uncharacterized protein OS=Canis lupus familiaris GN=ATP5L PE=4 SV=1	808.8	1250.1	554.3	557.5	529.8	768.8	586.1
E2R4D5	Uncharacterized protein OS=Canis lupus familiaris GN=SARS PE=4 SV=1	1038.2	1063.6	404.6	396.4	444.9	615	411.9
E2R4E5	Uncharacterized protein OS=Canis lupus familiaris PE=4 SV=1	259.7	364.8	271.9	267.5	302.2	320.1	302.7
E2R4E7	Uncharacterized protein OS=Canis lupus familiaris GN=AFM PE=3 SV=2	367.5	342.2	634.6	582.4	568.5	563.5	455.3
E2R4F5	60S ribosomal protein L13 OS=Canis lupus familiaris GN=RPL13 PE=3 SV=1	424.1	404.1	319.2	283.2	338.4	259.4	340.5
E2R4H4	Proteasome endopeptidase complex OS=Canis lupus familiaris GN=PSMA5 PE=3 SV=2	196.8	119.8	124.3	163.9	136.2	169.3	154.6
E2R4H6	Uncharacterized protein OS=Canis lupus familiaris GN=WDR5 PE=4 SV=2	217.6	185	395.4	349.5	342.8	358.9	297
E2R4I1	PRA1 family protein OS=Canis lupus familiaris GN=ARL6IP5 PE=3 SV=2	261.8	366.6	503.2	472.1	450	522.2	439.2
E2R4I2	Uncharacterized protein OS=Canis lupus familiaris GN=C2CD5 PE=4 SV=2	90.9	92.4	126.3	116	137.1	121.2	135.5
E2R4J1	Uncharacterized protein OS=Canis lupus familiaris GN=LAMB2 PE=4 SV=1	601.4	481.5	815.2	762.8	855.5	808.5	791.9
E2R4J2	Uncharacterized protein OS=Canis lupus familiaris GN=TMPO PE=4 SV=1	192.6	198.1	297.2	278.3	300.9	264.1	310.7
E2R4K8	Uncharacterized protein OS=Canis lupus familiaris GN=CPNE6 PE=4 SV=2	767	786.6	269.5	244.1	406.3	234.3	285.4
E2R4L0	Uncharacterized protein OS=Canis lupus familiaris GN=RBM39 PE=4 SV=1	230.5	211.8	285	330.8	388.8	341	340.2
E2R4L7	Serine hydroxymethyltransferase OS=Canis lupus familiaris GN=SHMT2 PE=3 SV=2	219.8	186.2	210.8	241.4	256.9	292.7	218.8
E2R4N7	40S ribosomal protein S12 OS=Canis lupus familiaris GN=RPS12 PE=3 SV=1	252.7	336.6	364.9	364.2	378	328.8	384.2
E2R4Q2	Uncharacterized protein OS=Canis lupus familiaris GN=STX7 PE=3 SV=2	480.8	489.9	432.2	444.5	496.1	438.4	456.6
E2R4R2	Uncharacterized protein OS=Canis lupus familiaris GN=FAM210A PE=4 SV=1	208.4	174.6	105.9	116.4	127.7	179.1	133
E2R4S5	Malic enzyme OS=Canis lupus familiaris GN=ME2 PE=3 SV=2	444	316.6	671.3	570.8	557.7	765.4	629.5
E2R4T5	Uncharacterized protein OS=Canis lupus familiaris GN=HSD17B4 PE=4 SV=2	580.4	537.5	483.1	488.8	476.5	503.9	526.9
E2R4U9	Uncharacterized protein OS=Canis lupus familiaris GN=BCAP31 PE=4 SV=2	1471.9	975.4	983.1	1089.5	1111.4	1253.8	1027
E2R4V3	Uncharacterized protein OS=Canis lupus familiaris GN=SERPINF2 PE=3 SV=1	234.5	212.3	573.3	453.3	496.1	303.8	348.9
E2R4V6	Uncharacterized protein OS=Canis lupus familiaris GN=NUP98 PE=4 SV=2	56.7	44.4	67.1	57.9	77.7	73	66.9
E2R4W1	Uncharacterized protein OS=Canis lupus familiaris GN=FAM98A PE=4 SV=2	108.5	57.4	92	96.5	110.6	103	68.3
E2R4X9	Uncharacterized protein OS=Canis lupus familiaris GN=PRPF8 PE=4 SV=2	440.8	326.6	560	617.2	626	776.2	538.1
E2R4Z2	Coronin OS=Canis lupus familiaris GN=CORO7 PE=3 SV=2	250.6	133.5	145.4	173.1	169.6	315	173.9
E2R501	Uncharacterized protein OS=Canis lupus familiaris GN=COPS7B PE=4 SV=1	276.2	167.2	172.2	178.4	193.2	175.2	215.9
E2R503	NADH dehydrogenase [ubiquinone] 1 alpha subcomplex subunit 2 OS=Canis lupus familiaris GN=NDUFA2 PE=4 SV=1	299	613.5	331.3	351.8	371.3	439.2	405.9
E2R507	Uncharacterized protein OS=Canis lupus familiaris GN=FABP3 PE=3 SV=1	611.6	404.1	320.8	259.8	277.5	526.8	231.4
E2R512	Uncharacterized protein OS=Canis lupus familiaris PE=4 SV=2	839.7	850.2	511.6	481.9	497.7	443.6	446.7
E2R513	Uncharacterized protein OS=Canis lupus familiaris GN=HMOX2 PE=4 SV=1	519	428.5	208.6	240.8	250.9	258.8	197.4
E2R514	Uncharacterized protein OS=Canis lupus familiaris GN=NDUFV1 PE=4 SV=1	219.1	289.9	133.6	147.4	170.4	196.5	178.4
E2R516	Synaptosomal-associated protein OS=Canis lupus familiaris GN=SNAP23 PE=3 SV=1	132.6	142.9	158.7	158	175.2	163.8	164.7
E2R518	Uncharacterized protein OS=Canis lupus familiaris GN=PCCA PE=4 SV=2	280.9	256	250	242.9	252.6	520.3	300.8
E2R529	Uncharacterized protein OS=Canis lupus familiaris GN=UBA6 PE=4 SV=2	285.7	249.1	487.1	530.6	378.9	318.4	521.4
E2R538	Uncharacterized protein OS=Canis lupus familiaris GN=NDUFA11 PE=4 SV=1	602.8	884	680.7	599.1	612.8	882.2	518.3
E2R541	Uncharacterized protein OS=Canis lupus familiaris GN=AIFM1 PE=4 SV=1	197.4	141.9	147.5	221.9	175.5	246.9	149.8
E2R552	Uncharacterized protein OS=Canis lupus familiaris GN=RALY PE=4 SV=1	151.7	140	316.7	315.9	289.6	288.1	307.1
E2R561	Uncharacterized protein OS=Canis lupus familiaris GN=NAPG PE=4 SV=1	355	801.5	376.1	394.4	369.3	344	424
E2R574	Uncharacterized protein OS=Canis lupus familiaris GN=EEF1G PE=4 SV=1	844.4	647.2	562.4	650.1	661	733.7	651.1
E2R578	Uncharacterized protein OS=Canis lupus familiaris GN=SLC25A11 PE=3 SV=2	606.2	725.5	456.5	399.3	434.9	481	476.3
E2R580	Uncharacterized protein OS=Canis lupus familiaris GN=VAPA PE=4 SV=1	675.2	834.3	870.7	831.8	880.2	834.6	808.5
E2R597	Uncharacterized protein OS=Canis lupus familiaris GN=PPM1B PE=3 SV=2	472.9	429.7	413.4	442.3	432.3	417.8	407
E2R5A5	Uncharacterized protein OS=Canis lupus familiaris GN=RAB31 PE=4 SV=1	594.4	438.7	375.4	440.3	422.2	393	451.6
E2R5B2	Uncharacterized protein OS=Canis lupus familiaris GN=ENO3 PE=3 SV=1	803.9	1195.5	824.8	502	556.2	1006.3	567.5
E2R5B9	Glutathione S-transferase OS=Canis lupus familiaris GN=GSTM3 PE=3 SV=1	765.9	529.6	257.5	274.5	271.3	231.8	287
E2R5D5	Uncharacterized protein OS=Canis lupus familiaris GN=RCN3 PE=4 SV=2	309.6	243	717	679	637.8	499.7	824.8
E2R5D7	Uncharacterized protein OS=Canis lupus familiaris GN=TCF25 PE=4 SV=2	345.5	311.5	213.8	209.4	323.8	290.5	210.6
E2R5E7	Uncharacterized protein OS=Canis lupus familiaris GN=C1orf123 PE=4 SV=2	119.1	253.6	161.5	197	166.1	154.1	193.9
E2R5F1	Uncharacterized protein OS=Canis lupus familiaris GN=EXOC8 PE=4 SV=1	228.8	153.8	325.3	593.6	301.3	579.8	255.8
E2R5G6	Uncharacterized protein OS=Canis lupus familiaris GN=RRAS PE=4 SV=1	235.1	223.6	193.4	214.1	191.8	176.7	207.1
E2R5H4	Uncharacterized protein OS=Canis lupus familiaris GN=ILK PE=4 SV=1	241.8	215.9	289.9	262.8	322.7	221	260.7
E2R5J0	Pentaxin OS=Canis lupus familiaris GN=CRP PE=3 SV=2	127.4	214.9	163	123.8	170.2	128.7	162.8
E2R5J6	Protein-serine/threonine kinase OS=Canis lupus familiaris GN=GRK2 PE=3 SV=2	106.2	71.6	54.9	77.7	89.8	88.9	60.2
E2R5K7	Uncharacterized protein OS=Canis lupus familiaris GN=SEC16A PE=4 SV=2	118.9	152.4	141.9	137.2	163.7	125	208.9
E2R5M0	Uncharacterized protein OS=Canis lupus familiaris GN=STMN4 PE=4 SV=2	451.1	630.1	397.3	337.3	397.1	299.1	347.1
E2R5M5	Uncharacterized protein OS=Canis lupus familiaris GN=NACA PE=4 SV=1	621.3	522	441.3	445.8	537.6	485.7	565.5
E2R5M7	Uncharacterized protein OS=Canis lupus familiaris GN=TXNL1 PE=4 SV=2	546.2	394.2	375.4	333.8	356.4	310.7	332.1
E2R5N5	Uncharacterized protein OS=Canis lupus familiaris GN=PSMD13 PE=4 SV=1	539.3	536	438.9	510.6	470.9	489.9	425.9
E2R5P5	Protein S100 OS=Canis lupus familiaris GN=S100A6 PE=3 SV=1	1569.5	1214.1	1014.2	1214.3	1115.6	1064.3	1394.8
E2R5Q1	Calponin OS=Canis lupus familiaris GN=CNN2 PE=3 SV=1	416.5	456.3	741.8	804.4	723	556.1	774.9
E2R5S5	Uncharacterized protein OS=Canis lupus familiaris GN=VAMP7 PE=3 SV=1	101.5	84.4	96.1	97.7	111.4	117.8	87.5
E2R5S7	Uncharacterized protein OS=Canis lupus familiaris GN=TMLHE PE=4 SV=1	329.5	414.5	205.4	226.8	224.1	212.2	266
E2R5T2	Uncharacterized protein OS=Canis lupus familiaris GN=SF3B4 PE=4 SV=1	116.3	155.6	119.6	119.1	131.9	145.3	140.9
E2R5T9	Uncharacterized protein OS=Canis lupus familiaris GN=ACTN4 PE=4 SV=1	1792.7	1294.7	1743.1	2095.6	2053	2089.5	2096.8
E2R5U8	Transthyretin OS=Canis lupus familiaris GN=TTR PE=3 SV=1	220.9	249.4	631.2	485.5	595.4	391.7	514.6
E2R5V6	Uncharacterized protein OS=Canis lupus familiaris GN=PRPF40A PE=4 SV=2	132.2	115	104.8	109.9	111.7	154.8	105.9
E2R5X8	Uncharacterized protein OS=Canis lupus familiaris GN=NDUFS8 PE=3 SV=1	127.3	253.9	95.2	84.8	103.8	111.4	125.5
E2R5Y7	Uncharacterized protein OS=Canis lupus familiaris GN=NUMA1 PE=4 SV=2	1084.8	657.1	1295	1410.5	1474.3	1492.5	1326.1
E2R5Z5	Transmembrane 9 superfamily member OS=Canis lupus familiaris GN=TM9SF2 PE=3 SV=2	121.1	98.9	145.2	205.3	217.8	245.5	209.5
E2R5Z9	Uncharacterized protein (Fragment) OS=Canis lupus familiaris GN=PGM3 PE=4 SV=2	380.6	360.7	290.5	310.2	282.3	285.1	354.9
E2R611	Uncharacterized protein OS=Canis lupus familiaris PE=4 SV=2	330.3	755.5	536.5	693.1	526.8	757.6	435.5
E2R612	Uncharacterized protein OS=Canis lupus familiaris GN=EFEMP1 PE=4 SV=1	683.1	490.9	1382.3	1299.3	1210.8	798.4	1376.1
E2R651	Uncharacterized protein OS=Canis lupus familiaris GN=RALBP1 PE=4 SV=1	182.1	122.3	118.4	113.6	116.5	154.9	113.8
E2R667	Coatomer subunit beta' OS=Canis lupus familiaris GN=COPB2 PE=3 SV=1	627.2	431.7	727.5	764.5	734.5	777.5	703.2
E2R674	Uncharacterized protein OS=Canis lupus familiaris GN=TPM2 PE=4 SV=2	2453.3	1527.1	3391.1	4114.2	3555.6	11142	3668.7
E2R680	Uncharacterized protein OS=Canis lupus familiaris GN=EML3 PE=4 SV=1	17.3	22	20.8	19	19.2	16.1	21.3
E2R685	Uncharacterized protein OS=Canis lupus familiaris GN=SLC25A4 PE=3 SV=1	1288.4	1569.3	461	435	456.3	887	491.9
E2R6D2	Uncharacterized protein OS=Canis lupus familiaris GN=C8G PE=3 SV=1	203.5	237	319.7	308.7	321.2	251.4	327.1
E2R6F8	Uncharacterized protein OS=Canis lupus familiaris GN=MPDU1 PE=4 SV=1	49.4	38.1	31.9	33.2	47.4	88.9	32.3
E2R6G0	Beta-synuclein OS=Canis lupus familiaris GN=SNCB PE=3 SV=1	343.6	575.1	130.4	115.2	113.4	112.7	103.9
E2R6I0	Uncharacterized protein OS=Canis lupus familiaris GN=PABPN1 PE=4 SV=1	679.3	292.5	536	674.1	650.1	752.2	625.3
E2R6J5	Uncharacterized protein OS=Canis lupus familiaris GN=USP4 PE=3 SV=1	330.4	254.9	185	211.1	208.7	219.1	200.5
E2R6K5	Histone H3 OS=Canis lupus familiaris GN=H3F3B PE=3 SV=1	283.4	307.2	751.7	641.5	1424.2	700.6	592
E2R6L1	Uncharacterized protein OS=Canis lupus familiaris GN=TNKS1BP1 PE=4 SV=1	183.6	188.1	222.1	200.4	216.8	226.9	222.6
E2R6L3	Uncharacterized protein OS=Canis lupus familiaris GN=LGI1 PE=4 SV=1	124.2	119.8	54.9	58.9	72.4	66.4	46.8
E2R6Q7	Uncharacterized protein OS=Canis lupus familiaris GN=CTSB PE=3 SV=1	481.2	562.1	879.9	1278.1	910.6	1545.6	728.6
E2R6R6	Uncharacterized protein OS=Canis lupus familiaris GN=DNAJC13 PE=4 SV=1	245.7	173.9	231.1	253.7	267.7	345.8	270.1
E2R6W9	Uncharacterized protein OS=Canis lupus familiaris GN=UBE2K PE=3 SV=1	186.9	131	103.8	111.7	115.1	121.4	93.8
E2R6Z2	Uncharacterized protein OS=Canis lupus familiaris PE=4 SV=2	150.1	134.3	106.6	120.9	131.8	79.2	128.7
E2R702	Uncharacterized protein OS=Canis lupus familiaris GN=CISD2 PE=4 SV=1	1413.4	836.3	410.8	423.9	427.3	483.7	408.7
E2R716	Uncharacterized protein OS=Canis lupus familiaris GN=MTR PE=4 SV=1	44.5	31.5	33	36.7	31.2	75.7	31.2
E2R729	Uncharacterized protein OS=Canis lupus familiaris GN=GANAB PE=3 SV=1	760.4	630.2	737.8	850.7	848.5	861.6	912.3
E2R758	Uncharacterized protein OS=Canis lupus familiaris GN=CYHR1 PE=4 SV=2	14.9	12.4	14.2	11	18.2	17.3	19.6
E2R761	L-lactate dehydrogenase OS=Canis lupus familiaris GN=LDHB PE=3 SV=1	2653.9	2306.2	801	782.2	747.4	964.4	766.9
E2R764	Dynein light chain roadblock OS=Canis lupus familiaris GN=DYNLRB1 PE=3 SV=1	236.9	202.8	149	205.1	185.4	218.9	179.1
E2R776	Uncharacterized protein OS=Canis lupus familiaris GN=ABAT PE=3 SV=2	802.2	595.4	256.4	269.4	299.7	245	345.4
E2R796	Uncharacterized protein OS=Canis lupus familiaris GN=AMBP PE=4 SV=2	185.3	104	340.9	335	265.7	194	219.5
E2R7A3	Uncharacterized protein OS=Canis lupus familiaris GN=CFI PE=3 SV=2	719.4	633.6	1818.6	1618.9	1477.9	1189.1	1659.9
E2R7E8	Uncharacterized protein OS=Canis lupus familiaris GN=APEH PE=4 SV=1	608.4	579.4	632.1	664.2	588.1	527.4	585.6
E2R7F1	Uncharacterized protein OS=Canis lupus familiaris GN=MSN PE=4 SV=2	2713.9	2348.4	2027.7	2088.3	2179.1	2324.8	2379.4
E2R7F3	Uncharacterized protein OS=Canis lupus familiaris GN=DNAJA2 PE=3 SV=2	242.1	273.6	202	201.7	195	205.3	197.3
E2R7G8	Uncharacterized protein OS=Canis lupus familiaris GN=ELMO1 PE=4 SV=2	934.4	808.1	740.8	849.5	750	943.1	763.7
E2R7G9	Uncharacterized protein OS=Canis lupus familiaris PE=4 SV=2	189	148.4	468	279.2	349.6	325.6	224.9
E2R7L1	Protein disulfide-isomerase A4 OS=Canis lupus familiaris GN=PDIA4 PE=3 SV=2	1437.1	1202.5	1865.3	1818.9	2141.5	2208.5	2162.6
E2R7M3	Uncharacterized protein OS=Canis lupus familiaris GN=PFKFB2 PE=4 SV=2	284.5	208	149.7	167.8	166.2	133.4	118.3
E2R7N5	Coronin OS=Canis lupus familiaris GN=CORO1B PE=3 SV=1	672.6	801.6	615.1	688.8	763	887.1	783.7
E2R7N6	Uncharacterized protein OS=Canis lupus familiaris GN=CHL1 PE=4 SV=2	612	444.7	296.9	255.9	324.8	219.4	352.8
E2R7R0	Uncharacterized protein OS=Canis lupus familiaris GN=TAX1BP3 PE=4 SV=2	17.1	39.3	21.4	20.2	23.2	22.4	24.6
E2R7R1	Uncharacterized protein OS=Canis lupus familiaris GN=ISG15 PE=4 SV=2	325.7	274.7	160.2	165	170.7	138	215.1
E2R7R4	Uncharacterized protein OS=Canis lupus familiaris GN=PDS5A PE=4 SV=1	133.6	131.3	212	216.2	221.2	467.7	186.1
E2R7R9	Uncharacterized protein OS=Canis lupus familiaris GN=PGAM5 PE=4 SV=2	637.9	574.1	578.3	567.7	578.2	542.5	420.6
E2R7S1	Calcium-transporting ATPase OS=Canis lupus familiaris GN=ATP2B1 PE=3 SV=2	767.4	725	568.6	609.5	596.5	623.5	563.3
E2R7T4	Structural maintenance of chromosomes protein OS=Canis lupus familiaris GN=SMC3 PE=3 SV=2	299.4	193.7	305.5	313.8	341.8	304.5	305
E2R7T5	Uncharacterized protein OS=Canis lupus familiaris GN=ALOX15 PE=3 SV=2	290.1	214.3	324.6	374.8	528.4	319.3	281.6
E2R7T6	Uncharacterized protein OS=Canis lupus familiaris GN=LOC484867 PE=4 SV=2	182	136.8	194.9	267.7	243.4	367.5	186.1
E2R7T7	Uncharacterized protein OS=Canis lupus familiaris GN=GLTP PE=4 SV=1	1063.7	825.4	345.6	357.1	331.4	372.7	309.2
E2R7W6	Uncharacterized protein OS=Canis lupus familiaris GN=KRT42 PE=3 SV=1	116.2	63.3	110.9	191.3	87.9	137.7	74.8
E2R7Y6	Uncharacterized protein OS=Canis lupus familiaris GN=CNOT10 PE=4 SV=1	130.8	68.8	125.9	143.4	152.9	151.8	152.8
E2R819	Uncharacterized protein OS=Canis lupus familiaris GN=RNF213 PE=4 SV=2	199.9	81	93.7	87.9	104	124.1	83.3
E2R830	Uncharacterized protein OS=Canis lupus familiaris GN=CPD PE=4 SV=1	883.4	523.1	363	381.3	378.6	325.5	397.6
E2R832	Phosphomannomutase OS=Canis lupus familiaris GN=PMM2 PE=3 SV=2	186.5	171.1	200.1	250.4	292.1	250	259.7
E2R836	Uncharacterized protein OS=Canis lupus familiaris GN=CCDC53 PE=4 SV=1	30.2	35.2	101.6	81.6	86.3	61.2	87.5
E2R837	Uncharacterized protein OS=Canis lupus familiaris GN=UBA2 PE=4 SV=2	257.2	265.9	210.6	229.8	248.3	254.9	259.6
E2R841	Uncharacterized protein OS=Canis lupus familiaris GN=HSPE1 PE=4 SV=1	493	311.4	338.8	369.9	407	471	400.3
E2R852	Uncharacterized protein OS=Canis lupus familiaris GN=SLC22A6 PE=4 SV=1	23.2	200	162.7	140.1	158.4	65.5	263.7
E2R856	Uncharacterized protein OS=Canis lupus familiaris GN=MYDGF PE=4 SV=2	250.9	252.3	302.8	301.2	332.2	287.7	372.2
E2R857	Uncharacterized protein OS=Canis lupus familiaris GN=BLMH PE=4 SV=1	571.7	315.9	274.7	292.2	284.5	292.7	270.8
E2R886	Uncharacterized protein OS=Canis lupus familiaris PE=4 SV=2	329.2	368.4	982.9	862.6	816.9	637.9	747.3
E2R8A2	Vacuolar protein sorting-associated protein 29 OS=Canis lupus familiaris GN=VPS29 PE=3 SV=2	328.3	354.3	294.8	336.3	311.3	320.5	311.7
E2R8A8	Uncharacterized protein OS=Canis lupus familiaris GN=RPS7 PE=4 SV=2	331	429.5	298.7	309.9	281.4	299.2	331.4
E2R8C0	Uncharacterized protein OS=Canis lupus familiaris GN=ACIN1 PE=4 SV=1	93.5	97.9	161.9	152.1	168.9	154.8	176.3
E2R8C2	Uncharacterized protein OS=Canis lupus familiaris GN=HK3 PE=3 SV=2	155.3	103.4	212	281	228.7	290.9	186.1
E2R8C9	Uncharacterized protein OS=Canis lupus familiaris GN=MOGS PE=4 SV=1	219.9	176.9	310.3	304.4	311.6	300.3	270.9
E2R8D6	Uncharacterized protein OS=Canis lupus familiaris GN=HNRNPH1 PE=4 SV=2	336.9	361.5	469.1	411.1	518.9	410	514.4
E2R8D8	Uncharacterized protein OS=Canis lupus familiaris GN=OCIAD1 PE=4 SV=1	102.4	123.2	161.4	212.9	135.9	148.5	117.1
E2R8F6	Uncharacterized protein OS=Canis lupus familiaris GN=CELF1 PE=4 SV=1	254.7	285.4	343.3	430.3	403.8	464.1	510.9
E2R8F7	Uncharacterized protein OS=Canis lupus familiaris GN=MYL3 PE=4 SV=2	653.9	509.8	1244.2	800	866.9	3368.3	723.3
E2R8L3	Uncharacterized protein OS=Canis lupus familiaris GN=PRPF19 PE=4 SV=2	628.1	508.5	729	798.3	820.6	854.7	778.2
E2R8P5	Uncharacterized protein OS=Canis lupus familiaris GN=VWA5A PE=4 SV=1	101.8	91.7	171.9	181.7	185.3	227.4	169.8
E2R8Q0	Uncharacterized protein OS=Canis lupus familiaris GN=SNX8 PE=4 SV=1	320	193.9	223.2	276.1	260.1	232.9	215.1
E2R8Q3	Uncharacterized protein OS=Canis lupus familiaris GN=GIT2 PE=4 SV=2	579.9	401.1	376.7	426.2	451.2	529.7	398.9
E2R8R8	Uncharacterized protein OS=Canis lupus familiaris GN=RPS9 PE=3 SV=1	255	211.6	212.9	207.6	238.3	236.3	245.2
E2R8S4	Uncharacterized protein OS=Canis lupus familiaris PE=4 SV=2	1779.6	1119.8	848.4	942.3	872.5	867.6	1059.1
E2R8W3	Uncharacterized protein OS=Canis lupus familiaris GN=CCDC22 PE=4 SV=1	170.2	109.4	107.4	119.3	127.5	144.5	96.2
E2R8W7	Uncharacterized protein OS=Canis lupus familiaris GN=CAB39 PE=4 SV=1	642.6	427.2	264.6	287.7	274.4	275.3	230.2
E2R8Y3	Uncharacterized protein OS=Canis lupus familiaris GN=SEC22B PE=3 SV=2	589	520.1	529.4	570.4	556.4	627.9	559.8
E2R915	Armadillo repeat-containing protein 1 OS=Canis lupus familiaris GN=ARMC1 PE=4 SV=1	107.7	66.1	90.9	92	101.6	106.6	75.6
E2R921	Uncharacterized protein OS=Canis lupus familiaris GN=ECH1 PE=3 SV=2	558	404.6	349	400.3	403.7	442.6	410.2
E2R928	Uncharacterized protein OS=Canis lupus familiaris GN=AKTIP PE=3 SV=1	214.8	155.3	131.4	128.3	124.5	115.9	133.3
E2R943	Uncharacterized protein OS=Canis lupus familiaris GN=METTL3 PE=3 SV=1	98.9	81.9	93.1	107.5	118.7	105.7	116.2
E2R944	Uncharacterized protein OS=Canis lupus familiaris GN=HNRNPL PE=4 SV=2	321.7	359.2	445.5	420.3	492.7	417.1	550.1
E2R948	Uncharacterized protein OS=Canis lupus familiaris GN=VDAC2 PE=4 SV=2	651.6	1533.7	548.9	493.9	532.7	626.3	547.3
E2R949	Uncharacterized protein OS=Canis lupus familiaris GN=SLC44A1 PE=3 SV=2	494.9	412.2	425.6	448.2	422.1	442.4	478.3
E2R967	Uncharacterized protein OS=Canis lupus familiaris GN=TECPR1 PE=4 SV=1	68.3	40.8	30.4	38.7	37.9	35.9	29.7
E2R970	Uncharacterized protein OS=Canis lupus familiaris GN=USP24 PE=3 SV=2	199.7	166.4	279.4	325.5	284.3	348.2	287.5
E2R974	Uncharacterized protein OS=Canis lupus familiaris GN=FABP4 PE=3 SV=1	219.2	128.7	453	452.5	287.9	378.7	200.1
E2R985	Actin-related protein 2/3 complex subunit 3 OS=Canis lupus familiaris PE=3 SV=2	293.5	198.9	193.4	272	257.7	295.6	286.8
E2R990	Uncharacterized protein OS=Canis lupus familiaris GN=CNOT1 PE=4 SV=2	240.3	142.8	320.3	289.2	272.3	323.2	256.9
E2R993	Uncharacterized protein OS=Canis lupus familiaris GN=EPHX2 PE=4 SV=1	358.8	218.9	154.2	158.9	156.2	169.1	108.7
E2R9A2	Coatomer subunit beta OS=Canis lupus familiaris GN=COPB1 PE=4 SV=2	414.5	283.8	446.6	475.5	457.6	484.8	400.3
E2R9B6	Uncharacterized protein OS=Canis lupus familiaris GN=FETUB PE=4 SV=1	433.4	310.7	986.3	757.3	785.4	516.6	768.8
E2R9D2	Uncharacterized protein OS=Canis lupus familiaris PE=4 SV=2	148.6	80.4	269.9	236.5	399.7	242.8	211.6
E2R9E3	Uncharacterized protein OS=Canis lupus familiaris GN=DDB1 PE=4 SV=1	326.5	303.6	251.5	272.8	263.6	307.8	280.5
E2R9F5	Uncharacterized protein OS=Canis lupus familiaris GN=HSD17B10 PE=3 SV=1	489.1	364.1	383.2	373.2	381	343.4	338.4
E2R9G7	Uncharacterized protein OS=Canis lupus familiaris GN=RPL11 PE=3 SV=2	117.8	126	202	201.1	233.6	214	232.4
E2R9I0	Polyadenylate-binding protein OS=Canis lupus familiaris GN=PABPC4 PE=3 SV=1	164.7	123.2	128	88.9	134.5	98.9	194.8
E2R9J8	Protein arginine N-methyltransferase 5 OS=Canis lupus familiaris GN=PRMT5 PE=3 SV=1	379.5	319.9	214.8	224.7	218.9	226.7	219.4
E2R9J9	Uncharacterized protein OS=Canis lupus familiaris GN=TPP2 PE=4 SV=2	73.9	31.1	48.7	50.8	50.7	50	37.2
E2R9K4	Uncharacterized protein OS=Canis lupus familiaris GN=XPO1 PE=4 SV=2	440.4	338.9	283.4	312.8	322	327.3	304.1
E2R9N5	Uncharacterized protein OS=Canis lupus familiaris GN=CPNE1 PE=4 SV=1	633.7	573.9	808.7	791.2	754.9	721.7	802.2
E2R9P0	Uncharacterized protein OS=Canis lupus familiaris GN=PPP1R1B PE=4 SV=2	137.3	155.1	73.3	86.7	83.3	76	70.7
E2R9P2	Uncharacterized protein OS=Canis lupus familiaris GN=S100A13 PE=3 SV=1	438.7	608.8	289.5	309.7	291.3	215.7	332
E2R9P5	Uncharacterized protein OS=Canis lupus familiaris GN=CSRP3 PE=4 SV=1	65.8	113.2	494.4	238.4	236.2	525.6	447.8
E2R9R1	Uncharacterized protein OS=Canis lupus familiaris GN=RSU1 PE=4 SV=1	312.6	244.9	329.8	342.8	345.9	298.4	381.4
E2R9R2	Cytochrome c oxidase subunit OS=Canis lupus familiaris GN=LOC612644 PE=3 SV=2	200.5	586.2	215.7	230.8	211.2	229.7	256.1
E2R9R5	Peptidylprolyl isomerase OS=Canis lupus familiaris GN=FKBP2 PE=4 SV=2	338.9	381.7	359.4	286.5	349.8	293.4	369.1
E2R9S7	Uncharacterized protein OS=Canis lupus familiaris GN=CTNNA1 PE=4 SV=1	602.2	475.8	718	709.2	768.3	611	821.8
E2R9T6	Uncharacterized protein OS=Canis lupus familiaris GN=ILF2 PE=4 SV=2	237.4	133.5	265.9	366.6	310	360.9	312
E2R9U2	Uncharacterized protein OS=Canis lupus familiaris GN=LPCAT2 PE=4 SV=2	271.6	253.8	223.2	266.5	218.1	258.8	220.5
E2R9U4	Uncharacterized protein OS=Canis lupus familiaris GN=TNNC1 PE=4 SV=1	447.8	236.7	603.1	442.3	519.4	4318.3	459.1
E2R9U8	Uncharacterized protein OS=Canis lupus familiaris GN=EEF1D PE=3 SV=2	210.4	200.5	236.3	243.7	235.5	259.6	217.4
E2R9V0	Ribosomal protein OS=Canis lupus familiaris GN=RPL10A PE=3 SV=2	258.7	335.5	324	241.4	412.2	276.4	504.5
E2R9V5	MICOS complex subunit OS=Canis lupus familiaris GN=CHCHD3 PE=3 SV=1	270.8	625.3	354.4	356.2	389.6	359.2	447.1
E2R9X5	Uncharacterized protein OS=Canis lupus familiaris GN=DEF6 PE=4 SV=2	96.5	89	233.1	227.2	203.4	200.7	211.7
E2R9Y2	Uncharacterized protein OS=Canis lupus familiaris GN=LOC490172 PE=4 SV=2	246.3	189.1	125.9	157	192.3	540.7	142
E2R9Y4	Uncharacterized protein OS=Canis lupus familiaris GN=GBP6 PE=4 SV=2	215.2	115.5	139.8	125.4	175	390.8	101.2
E2R9Y9	Uncharacterized protein OS=Canis lupus familiaris GN=RPLP2 PE=3 SV=1	91.1	105	123.5	109.9	148.1	128.8	111.6
E2RA06	Uncharacterized protein OS=Canis lupus familiaris GN=KANK2 PE=4 SV=1	225.4	153.7	361.9	366.4	380.6	508.5	362.9
E2RA07	Uncharacterized protein OS=Canis lupus familiaris GN=EWSR1 PE=4 SV=2	174.2	146.6	134	132.8	157.3	155.2	185
E2RA18	Calmegin OS=Canis lupus familiaris GN=CLGN PE=1 SV=2	463.4	238.5	55.8	43.2	52.6	57	57.4
E2RA22	Uncharacterized protein OS=Canis lupus familiaris GN=PSMD10 PE=4 SV=1	220.3	141.4	110.9	158	112.7	138.4	106.6
E2RA27	Uncharacterized protein OS=Canis lupus familiaris GN=BAG3 PE=4 SV=1	355.3	538.3	277.7	313.8	336.2	409	315.3
E2RA30	Uncharacterized protein OS=Canis lupus familiaris GN=C9orf64 PE=4 SV=1	429.3	294.8	230.9	335.6	296.8	363.8	248.9
E2RA41	Uncharacterized protein OS=Canis lupus familiaris GN=TIAL1 PE=4 SV=1	98.7	108.7	142.2	123.4	149.4	126.4	204.3
E2RA47	Uncharacterized protein OS=Canis lupus familiaris GN=NLRX1 PE=4 SV=1	72.8	71.2	78.7	81	80.7	84	95.5
E2RA50	Uncharacterized protein OS=Canis lupus familiaris PE=4 SV=2	525.3	369	502.2	519.4	547.6	451.8	534.3
E2RA92	Uncharacterized protein OS=Canis lupus familiaris GN=HEATR6 PE=4 SV=2	22.9	35.4	23.6	33.6	26	18.7	23.1
E2RAC6	Uncharacterized protein OS=Canis lupus familiaris GN=ATP6V1B2 PE=3 SV=2	366.3	308.7	156.5	157	157.5	156.9	143.8
E2RAE2	Uncharacterized protein OS=Canis lupus familiaris GN=ETFA PE=4 SV=2	434.7	460.7	289.2	315.7	321.2	451.9	404.2
E2RAE6	Sorting nexin OS=Canis lupus familiaris GN=SNX5 PE=3 SV=1	275.3	204.8	233.1	233.1	278.4	218.1	301.6
E2RAE8	Transgelin OS=Canis lupus familiaris GN=TAGLN PE=3 SV=2	395.1	344.7	702.2	1062.6	940.8	843.4	882.1
E2RAF0	Uncharacterized protein OS=Canis lupus familiaris GN=KLC1 PE=4 SV=2	1153.5	1050.8	481.6	530.2	594.1	709.8	456.7
E2RAF6	Acyl-coenzyme A oxidase OS=Canis lupus familiaris GN=ACOX1 PE=3 SV=1	541.4	359.8	401.8	587.3	606.9	492.3	436.9
E2RAG1	Uncharacterized protein OS=Canis lupus familiaris GN=RCL1 PE=4 SV=1	87.5	62.7	84	87.9	110.4	87.1	73.2
E2RAI8	Uncharacterized protein OS=Canis lupus familiaris GN=OXSR1 PE=4 SV=2	592.2	556.4	418.9	474.1	446	429.5	430.7
E2RAK7	Apolipoprotein A-II OS=Canis lupus familiaris GN=APOA2 PE=1 SV=2	277.6	355.9	1261.6	1039.8	947.8	596	798
E2RAL0	Uncharacterized protein OS=Canis lupus familiaris GN=ARHGDIB PE=4 SV=1	328.8	361	546.1	764.3	623.2	710.6	494.7
E2RAL7	Uncharacterized protein OS=Canis lupus familiaris GN=UBE2L6 PE=3 SV=1	214.4	158.9	162.7	196.8	182.6	209.8	181.7
E2RAM4	Uncharacterized protein OS=Canis lupus familiaris GN=FCER1G PE=4 SV=1	138.8	116.7	236.5	261.2	246.3	299.2	235.4
E2RAM9	Sulfotransferase OS=Canis lupus familiaris GN=SULT1C4 PE=3 SV=2	134.9	128.1	101.6	147.8	132.2	122.9	130.1
E2RAN5	Uncharacterized protein OS=Canis lupus familiaris GN=ERI3 PE=4 SV=2	545.8	668.3	567.3	549.5	520.4	414.7	599.3
E2RAN6	Uncharacterized protein OS=Canis lupus familiaris GN=FBP1 PE=3 SV=1	323.6	344	405.5	348.9	451.4	192.6	198.3
E2RAS8	Uncharacterized protein OS=Canis lupus familiaris GN=ENO2 PE=3 SV=2	323.9	718.9	112.4	115.4	119.7	119.1	138.9
E2RAT4	Uncharacterized protein OS=Canis lupus familiaris GN=NUDT5 PE=3 SV=1	690.5	599.5	356.4	314.8	339.2	305.5	407.9
E2RAT5	Uncharacterized protein OS=Canis lupus familiaris GN=PRPF4B PE=4 SV=2	146.2	92.1	95.2	106.8	101.8	134.1	124.9
E2RAT6	Uncharacterized protein OS=Canis lupus familiaris GN=COPE PE=4 SV=1	221	201.9	283.5	310.6	292.4	290.6	282
E2RAT8	Uncharacterized protein OS=Canis lupus familiaris GN=VPS18 PE=4 SV=1	151.8	138.9	176	225.7	214.4	263.5	184.5
E2RAU5	Stress-70 protein, mitochondrial OS=Canis lupus familiaris GN=HSPA9 PE=3 SV=1	1140.8	1129.7	766.5	835.6	826.1	941	918.7
E2RAU6	Uncharacterized protein OS=Canis lupus familiaris GN=AKR1B1 PE=4 SV=2	1177.5	1432.4	515.2	486.9	511.8	491.9	537.1
E2RAV2	Uncharacterized protein OS=Canis lupus familiaris GN=CAD PE=3 SV=2	249.3	132.6	182.3	203.3	199.8	243.7	158.4
E2RAY5	Uncharacterized protein OS=Canis lupus familiaris GN=MAG PE=4 SV=2	1091.8	1216.6	590.1	529.8	527.8	442.5	489.9
E2RAZ6	GrpE protein homolog OS=Canis lupus familiaris GN=GRPEL1 PE=3 SV=2	200.4	203.2	232.9	186.8	166.3	189.3	183.1
E2RAZ8	Glycerol-3-phosphate dehydrogenase OS=Canis lupus familiaris GN=GPD2 PE=3 SV=2	505.6	595.5	435.7	431.3	472.4	497.3	453.7
E2RB01	Uncharacterized protein OS=Canis lupus familiaris GN=ANGPTL2 PE=4 SV=1	269.6	83.4	459	436.8	412	357.3	545.4
E2RB11	Uncharacterized protein OS=Canis lupus familiaris GN=CASP10 PE=3 SV=2	272.7	368.4	173.2	171.5	194.7	192.8	254.6
E2RB31	Uncharacterized protein OS=Canis lupus familiaris GN=HYOU1 PE=3 SV=2	253.8	186.8	206.1	210	256.1	268.9	229.8
E2RB34	Uncharacterized protein OS=Canis lupus familiaris GN=NUP133 PE=4 SV=2	173.5	145.7	128.7	160.5	180.3	234.7	157.9
E2RB37	Uncharacterized protein OS=Canis lupus familiaris GN=PDIA6 PE=3 SV=1	171.2	159.1	222.6	287.9	269	311.1	291.9
E2RB38	Uncharacterized protein OS=Canis lupus familiaris GN=TPM3 PE=3 SV=2	936.7	568.7	954.8	1158.8	1025.6	1181.8	1085.1
E2RB45	Uncharacterized protein OS=Canis lupus familiaris GN=PI4K2A PE=4 SV=2	102	105.4	195.3	211.3	250.7	181.7	207.9
E2RB62	Uncharacterized protein OS=Canis lupus familiaris GN=MYO1B PE=3 SV=2	170.4	199.6	293.3	305.5	336.2	262.1	351.6
E2RB70	Uncharacterized protein OS=Canis lupus familiaris GN=NDRG2 PE=4 SV=2	1731.1	1759.1	539.7	546.3	600.6	541	574.3
E2RB79	T-complex protein 1 subunit gamma OS=Canis lupus familiaris GN=CCT3 PE=3 SV=2	861	840	598.6	618.9	635.3	580.5	624.8
E2RB81	Uncharacterized protein OS=Canis lupus familiaris GN=CCT5 PE=3 SV=2	1175.4	1233.5	996.1	1148	1013.9	1051.8	909
E2RB82	Signal transducer and activator of transcription OS=Canis lupus familiaris GN=STAT3 PE=3 SV=2	929.9	681.4	919	1037.7	955.4	990.2	953.8
E2RB90	Uncharacterized protein OS=Canis lupus familiaris GN=HNRNPF PE=4 SV=1	85.7	92.9	151.4	159.9	198.1	241.3	193.9
E2RB97	Uncharacterized protein OS=Canis lupus familiaris GN=HM13 PE=4 SV=1	240.7	247.7	431.2	458.6	523.2	680.3	405.2
E2RB98	Uncharacterized protein OS=Canis lupus familiaris GN=CYP51A1 PE=3 SV=2	721.9	383.3	199.4	179.7	227.5	193.9	203.6
E2RBA8	Uncharacterized protein OS=Canis lupus familiaris GN=PDLIM5 PE=4 SV=1	201.4	203.3	194.3	224.5	230.6	256.8	238
E2RBB4	RNA cytidine acetyltransferase OS=Canis lupus familiaris GN=NAT10 PE=3 SV=1	319	180.8	255.8	358.1	300.9	273.8	304.7
E2RBB8	Tyrosine-protein kinase OS=Canis lupus familiaris GN=LYN PE=3 SV=2	287.4	285.9	330	409.7	392.2	473.3	334.1
E2RBC1	Uncharacterized protein OS=Canis lupus familiaris GN=DCTN3 PE=4 SV=1	493.4	401.9	232	262.4	253.2	243.7	254.4
E2RBC3	Tubulin alpha chain OS=Canis lupus familiaris GN=TUBA4A PE=3 SV=1	2253.4	5187	1415.9	1443.9	1480.7	1299.3	1484.9
E2RBF2	Uncharacterized protein OS=Canis lupus familiaris GN=PUM3 PE=4 SV=2	59.2	107.8	81.7	80.8	77.8	86	82.7
E2RBF4	Uncharacterized protein OS=Canis lupus familiaris GN=THUMPD1 PE=4 SV=2	198.6	195.3	123.1	132.1	137	121.6	155.1
E2RBG0	Secretory carrier-associated membrane protein OS=Canis lupus familiaris GN=SCAMP5 PE=3 SV=2	535.5	575.9	266.9	205.3	222.6	213	219
E2RBG1	Uncharacterized protein OS=Canis lupus familiaris GN=PRPS1 PE=3 SV=1	311.9	245.5	163.4	163.3	200.5	186.2	165.4
E2RBH1	Uncharacterized protein OS=Canis lupus familiaris GN=PREB PE=4 SV=1	198	170.9	201.5	231.9	227.1	288.2	192.7
E2RBH4	Uncharacterized protein OS=Canis lupus familiaris GN=CCDC47 PE=4 SV=1	403.2	305.3	384.7	319.5	421	421.4	376.1
E2RBI2	Uncharacterized protein OS=Canis lupus familiaris GN=SLC25A12 PE=3 SV=1	166.7	242.8	140.4	117.2	129.7	103.1	118.9
E2RBJ5	Uncharacterized protein OS=Canis lupus familiaris GN=UROS PE=4 SV=1	188.6	127.7	355.1	295.3	287.5	214.2	223.3
E2RBM3	Uncharacterized protein OS=Canis lupus familiaris GN=ETF1 PE=4 SV=1	787	562.9	469.8	609.7	594.9	763.5	517.5
E2RBM4	Uncharacterized protein OS=Canis lupus familiaris GN=HELZ2 PE=4 SV=2	48	34.9	124.6	110.7	134.4	184.4	159.9
E2RBP8	Uncharacterized protein OS=Canis lupus familiaris GN=OPTN PE=4 SV=2	216.7	174.3	189.8	236.7	253.2	219.8	227.9
E2RBR6	Proteasome subunit beta OS=Canis lupus familiaris GN=PSMB4 PE=3 SV=1	390.6	340.2	355.1	389.3	391.8	323.1	407
E2RBU1	Uncharacterized protein OS=Canis lupus familiaris GN=STRAP PE=4 SV=2	532	407.4	312.4	344.6	341.6	436.9	330.6
E2RBU9	Uncharacterized protein OS=Canis lupus familiaris PE=3 SV=2	325.5	325.3	307.3	355.6	370.8	342.1	281.3
E2RBW1	GMP reductase OS=Canis lupus familiaris GN=GMPR2 PE=3 SV=1	326	291.6	404.2	337.9	345	276.8	364.2
E2RBW4	Uncharacterized protein OS=Canis lupus familiaris GN=TPM3 PE=3 SV=2	1197.8	766.8	1279.2	1350.7	1230.9	4890.4	1269
E2RBW8	Uncharacterized protein OS=Canis lupus familiaris GN=ASPN PE=4 SV=1	652.4	642.8	2463.5	1246.9	1445.2	1106.9	2525.8
E2RBX5	Uncharacterized protein OS=Canis lupus familiaris GN=BORCS8 PE=4 SV=1	110.8	134.1	155.4	174.1	151.7	136.8	150.8
E2RBX6	Uncharacterized protein OS=Canis lupus familiaris GN=KDELC2 PE=4 SV=2	98.8	42.3	78	107.1	87.2	87.6	82.7
E2RC20	Nucleoside diphosphate kinase OS=Canis lupus familiaris GN=NME1 PE=3 SV=2	1810.8	1734.3	971.3	1024.7	952	962.9	996.6
E2RC23	Uncharacterized protein OS=Canis lupus familiaris GN=PCOLCE PE=4 SV=1	181.2	185.6	421.5	489.4	411.4	298.8	504.3
E2RC33	Uncharacterized protein OS=Canis lupus familiaris GN=NOL3 PE=4 SV=2	175.8	41.9	65.4	53.2	93.5	72.5	48.6
E2RC62	10-formyltetrahydrofolate dehydrogenase OS=Canis lupus familiaris GN=ALDH1L2 PE=3 SV=2	617.7	206.2	282	273	306.4	298.6	266.5
E2RC92	Uncharacterized protein OS=Canis lupus familiaris GN=PFDN5 PE=3 SV=1	862.6	1072.1	983.3	902.5	1080.9	740.2	1100.7
E2RCA7	Uncharacterized protein OS=Canis lupus familiaris GN=ATP5G3 PE=3 SV=1	817.5	1348.1	411.5	365.8	456.1	399.5	451.3
E2RCC8	Uncharacterized protein OS=Canis lupus familiaris PE=4 SV=2	1388.9	1240	2821.2	2126.4	2512.7	1905.6	3203.3
E2RCD4	Uncharacterized protein OS=Canis lupus familiaris GN=KLC4 PE=4 SV=2	419.9	299.8	295.4	360.3	344.3	293.1	385.6
E2RCD6	tRNA-splicing ligase RtcB homolog OS=Canis lupus familiaris GN=RTCB PE=3 SV=1	448.3	393.8	433.8	431.5	462	401.9	452.1
E2RCD8	Uncharacterized protein OS=Canis lupus familiaris GN=WFS1 PE=4 SV=1	203.9	199	251.7	255.5	271.4	209.8	258.6
E2RCF2	Uncharacterized protein OS=Canis lupus familiaris GN=EMILIN1 PE=4 SV=2	194.5	124.5	584.7	563.4	545.6	322.7	519.9
E2RCF9	Uncharacterized protein OS=Canis lupus familiaris GN=PCBP2 PE=4 SV=2	301.5	359	252.6	251.2	273.4	257	290.4
E2RCH3	Uroporphyrinogen decarboxylase OS=Canis lupus familiaris GN=UROD PE=3 SV=1	182.5	130.4	178	150.1	155.1	135.1	150.8
E2RCI5	Uncharacterized protein OS=Canis lupus familiaris GN=SKIV2L2 PE=4 SV=2	329.7	323.5	221.7	243.9	244.2	313.3	257.9
E2RCI8	Annexin OS=Canis lupus familiaris GN=ANXA6 PE=3 SV=2	1936	3037	2239.9	2403.5	2296	2335.2	2396.1
E2RCJ9	Uncharacterized protein OS=Canis lupus familiaris GN=CNTN1 PE=4 SV=2	1031.2	1026.8	422.2	382.5	488	536.6	434.2
E2RCK3	Uncharacterized protein OS=Canis lupus familiaris GN=CRTAP PE=4 SV=2	338.8	346.3	464.4	540.2	620.1	1511.9	527.2
E2RCL4	40S ribosomal protein S21 OS=Canis lupus familiaris GN=RPS21 PE=3 SV=2	181.7	302	234.1	196.8	241.1	196.2	232.6
E2RCL5	Uncharacterized protein OS=Canis lupus familiaris GN=CRYM PE=4 SV=1	122.6	111.2	145.4	136	275.6	118.3	291.4
E2RCL7	Uncharacterized protein OS=Canis lupus familiaris GN=PICALM PE=4 SV=2	368.3	269.3	301.7	379.9	340.6	545.2	369.2
E2RCN3	Uncharacterized protein OS=Canis lupus familiaris GN=CDC37 PE=4 SV=1	666.8	546.3	473	498.6	498.3	506.9	514.6
E2RCN4	Uncharacterized protein OS=Canis lupus familiaris GN=TOR1AIP1 PE=4 SV=2	188.6	124.1	272.7	272.2	272.6	242.7	278.6
E2RCN8	Anoctamin OS=Canis lupus familiaris GN=ANO10 PE=3 SV=2	162	140.9	165.9	181.9	190.3	262.4	158.4
E2RCP2	Uncharacterized protein OS=Canis lupus familiaris GN=CILP2 PE=4 SV=2	165.9	144.7	399.9	198.8	301.5	213.4	377.2
E2RCP9	Uncharacterized protein OS=Canis lupus familiaris GN=PSMD2 PE=4 SV=1	778.2	627.6	594.5	694.5	617.9	650.1	600.4
E2RCQ9	S-formylglutathione hydrolase OS=Canis lupus familiaris GN=ESD PE=3 SV=1	331.2	537.5	390.6	504.7	420.9	309.4	439.4
E2RCU6	Uncharacterized protein OS=Canis lupus familiaris GN=TTC36 PE=4 SV=1	249.9	209.5	576.8	626.4	430.9	407.9	404.2
E2RCV4	Uncharacterized protein OS=Canis lupus familiaris GN=LOXL2 PE=4 SV=2	334.7	149.9	233.3	283.9	308.1	340.4	373.4
E2RCY1	Uncharacterized protein OS=Canis lupus familiaris GN=FAM49B PE=4 SV=1	317.3	296.7	243.1	252.2	278.4	263.1	243.2
E2RCY4	DnaJ homolog subfamily C member 10 OS=Canis lupus familiaris GN=DNAJC10 PE=4 SV=1	311.2	193	238	284.3	251.8	308.1	214.2
E2RCY8	Aconitate hydratase, mitochondrial OS=Canis lupus familiaris GN=ACO2 PE=3 SV=1	1934	1948.8	1155.2	1204.3	1237.3	1297	1341.2
E2RCZ7	Core histone macro-H2A OS=Canis lupus familiaris GN=H2AFY PE=4 SV=1	321.9	293.2	545.2	561.4	578.5	725.6	556.7
E2RD29	CTP synthase OS=Canis lupus familiaris GN=CTPS2 PE=3 SV=2	250.7	238.9	116.6	173.1	165.6	202.6	103.6
E2RD37	Uncharacterized protein OS=Canis lupus familiaris GN=TRA2B PE=4 SV=2	147.4	341.7	145.8	91.8	125	113.5	249.2
E2RD65	Actin-related protein 2/3 complex subunit 5 OS=Canis lupus familiaris GN=ARPC5 PE=3 SV=2	334.6	427.6	467.8	529.6	479.1	494.7	494.5
E2RD70	Uncharacterized protein OS=Canis lupus familiaris GN=COPS3 PE=4 SV=1	524.5	422.9	323.3	335.6	342.7	313.3	407.9
E2RD72	Uncharacterized protein OS=Canis lupus familiaris GN=DLG1 PE=4 SV=2	587.1	250.8	225.4	271	236	250.7	233.4
E2RD75	Uncharacterized protein OS=Canis lupus familiaris GN=NDUFS1 PE=3 SV=1	526.5	689.7	392.6	424.8	446.1	532.5	453.5
E2RD79	DNA helicase OS=Canis lupus familiaris GN=MCM6 PE=3 SV=1	225.4	132.2	241.2	206.6	238	226.6	188.5
E2RD86	Protein disulfide-isomerase OS=Canis lupus familiaris GN=PDIA3 PE=3 SV=1	1547	1571.3	1927.1	1924.8	2115.3	2122.1	2116.8
E2RD87	Uncharacterized protein OS=Canis lupus familiaris GN=FAM177A1 PE=4 SV=2	317.5	346	178.4	188	181.6	183.5	161.4
E2RD92	Uncharacterized protein OS=Canis lupus familiaris GN=MLEC PE=4 SV=1	442.2	357.9	565.8	559.3	555.7	539.9	534.6
E2RD94	Uncharacterized protein OS=Canis lupus familiaris GN=FAP PE=4 SV=2	493.9	409.7	1337.1	1468.2	1312.2	930.1	1176.7
E2RD95	Uncharacterized protein OS=Canis lupus familiaris GN=GNB2 PE=4 SV=1	483.1	582.4	320.1	295.5	433.2	269.3	343.3
E2RDA6	Uncharacterized protein OS=Canis lupus familiaris GN=GALK2 PE=4 SV=1	152.6	167.2	140.9	170.5	171.8	168.9	171
E2RDB2	Uncharacterized protein OS=Canis lupus familiaris GN=SRSF2 PE=4 SV=1	417	966.7	661.2	614.6	741	600.8	751.5
E2RDB9	Uncharacterized protein OS=Canis lupus familiaris GN=PHLDB2 PE=4 SV=2	83.8	56.7	73.8	78.7	87.8	66.4	80.9
E2RDD3	Uncharacterized protein OS=Canis lupus familiaris GN=TUSC3 PE=4 SV=2	156.3	176.8	209.1	221.7	216	200.4	187.9
E2RDD9	Alpha-synuclein OS=Canis lupus familiaris GN=SNCA PE=3 SV=2	510.9	640.9	183.5	166.6	191.2	158	227.9
E2RDE0	Uncharacterized protein OS=Canis lupus familiaris GN=MAPRE3 PE=4 SV=1	280.8	651.7	249.6	221.5	211.2	182.3	260.3
E2RDF9	Uncharacterized protein OS=Canis lupus familiaris GN=HP1BP3 PE=4 SV=1	143.6	102.9	169.8	109.3	153.5	112.2	200.8
E2RDI0	Uncharacterized protein OS=Canis lupus familiaris GN=CNPY3 PE=4 SV=1	121.7	144.6	147.1	155.8	193.4	198.1	226.1
E2RDK4	Uncharacterized protein OS=Canis lupus familiaris GN=TBCC PE=4 SV=1	363.9	342.2	257.3	286.3	318.3	266.7	323
E2RDL7	Uncharacterized protein OS=Canis lupus familiaris GN=APOBEC2 PE=4 SV=1	63	37.4	39.5	39.8	40.3	515.3	33.5
E2RDL8	Uncharacterized protein OS=Canis lupus familiaris GN=SF3A1 PE=4 SV=1	485.3	275.9	520.1	508.2	512	504	526.7
E2RDN1	Phosphoserine aminotransferase OS=Canis lupus familiaris GN=PSAT1 PE=3 SV=2	818.9	1087.3	288	281.2	293.1	280.5	284.1
E2RDP4	Uncharacterized protein OS=Canis lupus familiaris GN=ADRM1 PE=4 SV=1	20.7	95.8	77.6	100.9	89.5	86.4	93.7
E2RDS4	Uncharacterized protein OS=Canis lupus familiaris GN=CHCHD4 PE=4 SV=2	401.3	324.9	312.2	354.4	339.1	394.4	400.9
E2RDU2	Uncharacterized protein OS=Canis lupus familiaris GN=SGTB PE=4 SV=1	270.2	322.5	92	92.4	104.8	89.8	111.9
E2RDX1	Uncharacterized protein OS=Canis lupus familiaris GN=RILPL1 PE=4 SV=1	307.7	253.1	182.5	221.2	244	224	199.2
E2RDX2	Uncharacterized protein OS=Canis lupus familiaris GN=CHMP4B PE=4 SV=1	182	217.6	109.8	101.3	138.2	146.4	162.8
E2RDX6	Uncharacterized protein OS=Canis lupus familiaris GN=COMTD1 PE=4 SV=1	188.5	201.7	142.8	116.2	123.2	172.5	126.9
E2RDY9	Uncharacterized protein OS=Canis lupus familiaris GN=BOD1L1 PE=4 SV=2	152.8	61.7	125	157.8	180.4	167.1	165.5
E2RDZ4	Uncharacterized protein OS=Canis lupus familiaris GN=EIF4A3 PE=3 SV=1	200.7	171.1	221	229.2	219.3	243.1	205.8
E2RDZ6	NAD-dependent protein deacylase sirtuin-5, mitochondrial OS=Canis lupus familiaris GN=SIRT5 PE=3 SV=1	217	146.3	195.5	252.4	242	232	184
E2RDZ9	Kinesin-like protein OS=Canis lupus familiaris GN=KIF5C PE=3 SV=2	2088.1	1258.5	473.6	601.8	670.2	695.3	529.5
E2RE03	Uncharacterized protein OS=Canis lupus familiaris GN=CDH5 PE=4 SV=2	133.8	94.6	184.6	199	208.8	199	212.7
E2RE13	Uncharacterized protein OS=Canis lupus familiaris GN=ARL8B PE=3 SV=1	198.6	260	259	241.8	231	246.2	289.4
E2RE24	NEDD8-activating enzyme E1 regulatory subunit OS=Canis lupus familiaris GN=NAE1 PE=3 SV=2	253.3	184.3	81.9	85.8	95.4	103.6	90.9
E2RE32	Uncharacterized protein OS=Canis lupus familiaris GN=RNF25 PE=4 SV=1	72.8	143	57.7	68.3	74.4	58.2	76.7
E2RE36	Uncharacterized protein OS=Canis lupus familiaris GN=HNRNPR PE=4 SV=2	94.7	160.3	175.4	151.3	188	194.5	249.8
E2RE39	Adenylate kinase 2, mitochondrial OS=Canis lupus familiaris GN=AK2 PE=3 SV=2	227.2	303.8	338.1	352.6	391.2	340.3	462.3
E2RE59	Uncharacterized protein OS=Canis lupus familiaris GN=NAPB PE=4 SV=1	480.8	476.3	201.8	224.5	214.9	204.5	234.9
E2RE61	Transgelin OS=Canis lupus familiaris GN=TAGLN3 PE=3 SV=1	174.2	289.3	83.2	94.4	98	92.7	98.4
E2RE76	Apolipoprotein A-IV OS=Canis lupus familiaris GN=APOA4 PE=3 SV=2	888.3	765	1563.9	1402.7	1266.7	1139.9	1300.1
E2RE99	Uncharacterized protein OS=Canis lupus familiaris GN=INA PE=3 SV=1	1153.6	2583.8	752.8	753.1	675	635.6	766.5
E2REA4	Uncharacterized protein OS=Canis lupus familiaris GN=YWHAQ PE=3 SV=2	955.4	582.4	464.2	569.9	483.4	438.3	536.8
E2REA5	Uncharacterized protein OS=Canis lupus familiaris GN=GSTA4 PE=3 SV=1	390.6	321.3	217.4	264.1	288.8	224.5	286.5
E2REA8	Uncharacterized protein OS=Canis lupus familiaris GN=COPS2 PE=4 SV=2	267	181	170.5	168.4	159.6	205.5	134
E2REB0	Uncharacterized protein OS=Canis lupus familiaris GN=EMILIN2 PE=4 SV=1	183.9	155.5	146.7	276.1	220.2	231.8	271.1
E2RED3	Uncharacterized protein OS=Canis lupus familiaris GN=COPS7A PE=4 SV=1	1184.3	894.1	649.2	676.2	619.2	877.4	662
E2REF3	Urea transporter OS=Canis lupus familiaris GN=SLC14A1 PE=3 SV=2	485.4	542.6	356.6	379.5	444.7	366.9	347.8
E2REH3	Uncharacterized protein OS=Canis lupus familiaris GN=PAK1 PE=4 SV=1	430.2	381.7	147.3	156.6	157.2	163.6	149.3
E2REH5	Uncharacterized protein OS=Canis lupus familiaris GN=ACAA1 PE=3 SV=1	528.2	471.1	567.5	495.5	563.4	354.2	511.1
E2REJ7	Uncharacterized protein OS=Canis lupus familiaris GN=PSIP1 PE=4 SV=2	135.8	101.6	179.5	219.2	224.4	297.8	203
E2REK3	Eukaryotic translation initiation factor 3 subunit D OS=Canis lupus familiaris GN=EIF3D PE=3 SV=2	272.9	237.8	211.4	257.1	277.4	358.9	221.6
E2REM0	Uncharacterized protein OS=Canis lupus familiaris GN=CYC1 PE=4 SV=1	277.9	292.5	185.7	216.4	183.5	300.1	194.2
E2REP0	Uncharacterized protein OS=Canis lupus familiaris GN=MPZ PE=4 SV=1	418.4	1055.9	642.6	822	812.2	422.7	1633.7
E2REP2	Uncharacterized protein OS=Canis lupus familiaris GN=TFG PE=4 SV=1	293.5	238.2	178.4	239	218.4	248.6	227
E2REQ8	Uncharacterized protein OS=Canis lupus familiaris GN=PHKA2 PE=4 SV=2	207.3	239.1	197.2	264.9	249.5	246.9	201.3
E2RER1	Uncharacterized protein OS=Canis lupus familiaris PE=4 SV=2	363.5	324.7	219.5	159.3	192.2	154.7	261.7
E2RES2	Uncharacterized protein OS=Canis lupus familiaris GN=SERPINC1 PE=3 SV=2	590.6	402.9	1395.1	1326.1	1163.9	1006.9	901.8
E2RET1	Uncharacterized protein OS=Canis lupus familiaris GN=HDLBP PE=4 SV=1	559.8	484	739.5	729.4	792.3	751.9	724.2
E2REU7	Uncharacterized protein OS=Canis lupus familiaris GN=SUPT16H PE=4 SV=1	265.9	270.9	271.4	306.5	377.2	369.2	287.2
E2REU8	Uncharacterized protein OS=Canis lupus familiaris GN=FARP1 PE=4 SV=2	160.6	173.7	87.5	115.2	117.5	112.1	100.5
E2REW4	Uncharacterized protein OS=Canis lupus familiaris GN=CBFB PE=4 SV=2	141.7	100.5	172.6	204.3	220.3	180.7	175.7
E2RF02	Uncharacterized protein OS=Canis lupus familiaris GN=UBR4 PE=4 SV=1	216.9	169.4	213.8	199.2	200.3	192.2	203.3
E2RF04	Uncharacterized protein OS=Canis lupus familiaris GN=FBXO3 PE=4 SV=2	151.3	88.7	36.7	34.7	44.5	38.8	37.1
E2RF05	Uncharacterized protein OS=Canis lupus familiaris GN=SMIM15 PE=4 SV=2	259.8	130.1	298.5	367	318.2	314.7	273.6
E2RF06	Uncharacterized protein OS=Canis lupus familiaris GN=IPO5 PE=4 SV=2	209.1	186.3	87.1	109.1	150.1	142.4	104.6
E2RF16	Uncharacterized protein OS=Canis lupus familiaris GN=NT5C2 PE=4 SV=2	364.4	324.1	404.4	440	421.3	318.6	453.1
E2RF18	NADH-cytochrome b5 reductase OS=Canis lupus familiaris GN=CYB5R1 PE=3 SV=1	803.4	699.9	561.1	493.7	564.6	566.8	689.7
E2RF27	Uncharacterized protein OS=Canis lupus familiaris GN=UBXN4 PE=4 SV=2	875.6	769.8	517.8	506.1	552.4	438.3	594
E2RF32	Uncharacterized protein OS=Canis lupus familiaris GN=HINT2 PE=4 SV=1	85.7	321.6	139.2	141.3	137.8	103.8	253.7
E2RF34	Uncharacterized protein OS=Canis lupus familiaris GN=ELMO2 PE=4 SV=2	137.1	95.4	72.3	76.9	81.9	66.1	81.3
E2RF35	Calcium-transporting ATPase OS=Canis lupus familiaris GN=ATP2B2 PE=3 SV=2	548.2	567.2	306.8	328.3	331.6	322.2	289.4
E2RF73	DNA helicase OS=Canis lupus familiaris GN=MCM3 PE=3 SV=2	149.1	102.2	221.9	262.8	263.8	258.7	227
E2RF81	Uncharacterized protein OS=Canis lupus familiaris GN=TCOF1 PE=4 SV=2	452.2	371.1	665.5	601.1	609.3	634.2	728.6
E2RF90	Uncharacterized protein OS=Canis lupus familiaris GN=CD74 PE=4 SV=2	205.9	170.9	224.5	291.2	253.7	437.1	235.8
E2RF91	Uncharacterized protein OS=Canis lupus familiaris GN=CMBL PE=4 SV=1	197.5	182.3	123.7	141.5	137.7	187.9	122.5
E2RFA3	RNA helicase OS=Canis lupus familiaris GN=DDX18 PE=3 SV=2	393	230.6	411.9	461.1	456.2	575.9	438.1
E2RFC0	Amine oxidase OS=Canis lupus familiaris GN=AOC3 PE=3 SV=2	144.1	113.7	230.5	201.3	199.3	285.7	217.9
E2RFC3	Uncharacterized protein OS=Canis lupus familiaris GN=CAND2 PE=4 SV=2	225.3	196.9	177.1	202.3	195.5	275	250.5
E2RFC7	Uncharacterized protein OS=Canis lupus familiaris GN=C8H14orf166 PE=4 SV=1	190.2	168.7	183.8	234.3	207	228.5	252.7
E2RFD0	Uncharacterized protein OS=Canis lupus familiaris GN=HMGCL PE=4 SV=1	706.5	667.1	596.7	602.4	631.2	745	771.1
E2RFE1	Integrin beta OS=Canis lupus familiaris PE=3 SV=2	175.3	114.3	218	203.5	214.8	168.5	254.4
E2RFF0	Uncharacterized protein OS=Canis lupus familiaris GN=RHEB PE=4 SV=1	337.9	480.3	262.6	316.9	308.8	320.3	308.5
E2RFF7	Tyrosine-protein kinase OS=Canis lupus familiaris GN=CSK PE=3 SV=2	220.3	154.4	207.6	257.3	253.1	278.8	198.5
E2RFG1	Uncharacterized protein OS=Canis lupus familiaris GN=MAPRE2 PE=4 SV=2	159.9	158.3	135.7	124.4	127.3	114.4	99
E2RFI6	Uncharacterized protein OS=Canis lupus familiaris GN=TIMM50 PE=4 SV=2	231.9	224.6	149.7	172.1	174	189.2	142.1
E2RFJ7	Tubulin beta chain OS=Canis lupus familiaris GN=TUBB2B PE=3 SV=1	712.5	2052.3	385.5	335.2	364.7	501.1	425.2
E2RFK4	Uncharacterized protein OS=Canis lupus familiaris GN=CD177 PE=4 SV=1	253.9	130.5	339.8	431.3	344.7	418.7	219.7
E2RFL0	Uncharacterized protein OS=Canis lupus familiaris GN=ETHE1 PE=4 SV=1	346.3	283.8	710.5	553.6	572.2	487.7	464.9
E2RFM5	Uncharacterized protein OS=Canis lupus familiaris GN=MGAT1 PE=4 SV=1	125.1	102.7	95.8	92.4	96	124.9	91.4
E2RFP3	Uncharacterized protein OS=Canis lupus familiaris GN=C12orf57 PE=4 SV=1	165.7	234.6	196.6	207.2	197.8	189.6	210.7
E2RFR0	40S ribosomal protein S8 OS=Canis lupus familiaris GN=RPS8 PE=3 SV=1	266.9	399.3	285.4	215.5	247.1	234.5	280.2
E2RFR5	Uncharacterized protein OS=Canis lupus familiaris GN=DYNLL2 PE=4 SV=1	411.8	475.4	160.4	126.4	132.2	106.8	120.8
E2RFR8	Tyrosine-protein phosphatase non-receptor type OS=Canis lupus familiaris GN=PTPN6 PE=3 SV=2	395.2	211.7	373.5	536.5	450.2	534.9	342.5
E2RFV2	Tubulin beta chain OS=Canis lupus familiaris GN=TUBB4A PE=3 SV=2	499.1	1075.9	247.8	237	228.9	235.5	232.8
E2RFV4	Uncharacterized protein OS=Canis lupus familiaris GN=NSF PE=4 SV=2	1333.4	1740.8	775.3	819.3	797.5	723.6	730.3
E2RFV7	Uncharacterized protein OS=Canis lupus familiaris GN=HNRNPA3 PE=4 SV=2	324.5	289.3	306	234.1	313.8	239.4	426.5
E2RFV9	Uncharacterized protein OS=Canis lupus familiaris GN=C9 PE=4 SV=2	709.8	442.6	827.6	777.3	699.6	666.6	770.9
E2RFW4	Uncharacterized protein OS=Canis lupus familiaris GN=DAB2 PE=4 SV=2	93.2	83.8	179.2	197.8	204.8	188.3	177.1
E2RFY4	Uncharacterized protein OS=Canis lupus familiaris GN=PDK3 PE=4 SV=1	306.1	207.8	492.9	810	373	646.1	299.6
E2RFY9	Adenylate kinase 4, mitochondrial OS=Canis lupus familiaris GN=AK4 PE=3 SV=2	529.7	509.6	354.6	288.5	336.3	324.9	376.6
E2RFZ4	Uncharacterized protein OS=Canis lupus familiaris GN=SLK PE=4 SV=1	373	230.9	218.3	251.2	273.5	276.1	256.2
E2RG01	Uncharacterized protein OS=Canis lupus familiaris GN=C7 PE=4 SV=2	652.4	490.9	913.6	903.3	884.5	634.8	857.3
E2RG22	Uncharacterized protein OS=Canis lupus familiaris GN=USP12 PE=3 SV=1	170	242.3	146.2	121.5	164.3	126.8	173.9
E2RG47	Dolichyl-diphosphooligosaccharide--protein glycosyltransferase subunit STT3B OS=Canis lupus familiaris GN=STT3B PE=1 SV=1	208	196.4	313.5	351.1	336.1	387.7	258.9
E2RG56	Uncharacterized protein OS=Canis lupus familiaris GN=CAMK2G PE=4 SV=2	452.6	532	261.1	257.3	263.5	199.2	227
E2RG59	Uncharacterized protein OS=Canis lupus familiaris GN=KTN1 PE=4 SV=2	788.9	518.4	914.4	990.8	870.2	1067.8	991.7
E2RG67	Uncharacterized protein OS=Canis lupus familiaris GN=ARL1 PE=3 SV=2	98.3	83	154.2	132.3	113.2	125.4	91.4
E2RG71	Uncharacterized protein OS=Canis lupus familiaris GN=APBA1 PE=4 SV=2	87.9	157.2	100.8	85.9	184.6	175.1	120
E2RG72	Uncharacterized protein OS=Canis lupus familiaris GN=KIAA1033 PE=4 SV=2	264.1	223.9	291.8	295.9	280.2	288.5	237.7
E2RG82	Uncharacterized protein OS=Canis lupus familiaris GN=DCTN4 PE=4 SV=1	589.6	402.9	263.1	299.8	300.4	352.2	288.7
E2RGB7	Uncharacterized protein OS=Canis lupus familiaris GN=UBL7 PE=4 SV=2	125.9	108.2	129.5	126.4	134.1	139.9	110.2
E2RGC2	Uncharacterized protein OS=Canis lupus familiaris GN=C19orf66 PE=4 SV=2	367.8	277.6	118.3	172.7	172.6	210.9	187.9
E2RGD3	Uncharacterized protein OS=Canis lupus familiaris GN=TWF2 PE=4 SV=2	307.4	366.8	403.5	394.8	429.6	428.1	409.1
E2RGE0	Uncharacterized protein OS=Canis lupus familiaris GN=BANF1 PE=4 SV=1	36.1	143.1	204.5	272.2	218	199.2	189.6
E2RGF3	Na(+)/H(+) exchange regulatory cofactor NHE-RF OS=Canis lupus familiaris GN=SLC9A3R1 PE=4 SV=2	428.9	503.3	245.9	271.4	344.7	279.2	283.5
E2RGF8	Uncharacterized protein OS=Canis lupus familiaris GN=FBXO2 PE=4 SV=2	493.4	424.9	197	212.5	214.2	307.8	201.5
E2RGG9	Uncharacterized protein OS=Canis lupus familiaris GN=WARS PE=3 SV=1	756.9	630.1	275.9	346.5	364.8	777.8	295.9
E2RGH5	Uncharacterized protein OS=Canis lupus familiaris GN=UBA1 PE=3 SV=2	1612.5	1404.1	871.3	958	938.3	889.5	935.7
E2RGH9	Uncharacterized protein OS=Canis lupus familiaris GN=HECTD1 PE=4 SV=2	166.2	114.6	110.9	150.7	147	152.2	125.6
E2RGI4	Chloride intracellular channel protein OS=Canis lupus familiaris GN=CLIC4 PE=3 SV=1	384	238.5	193.4	245.9	229.5	267.8	248.4
E2RGI5	Guanine nucleotide-binding protein subunit gamma OS=Canis lupus familiaris GN=GNG5 PE=3 SV=2	1099.8	1488.4	580.8	574.8	587.9	411.5	808.3
E2RGI7	Uncharacterized protein OS=Canis lupus familiaris GN=ARGLU1 PE=4 SV=2	192	112.8	291.2	310	323.9	309.8	326.7
E2RGJ6	Uncharacterized protein OS=Canis lupus familiaris GN=DNAJB12 PE=4 SV=2	119.2	92.9	115.4	103.2	134	107.9	102.5
E2RGK6	Uncharacterized protein OS=Canis lupus familiaris GN=PACSIN1 PE=4 SV=1	677.8	1289.2	426.7	458	431.1	369.4	483.9
E2RGL6	Uncharacterized protein OS=Canis lupus familiaris PE=4 SV=2	251.5	125.1	305.8	338.5	309.2	329.6	246.8
E2RGL7	Uncharacterized protein OS=Canis lupus familiaris GN=LOC100856647 PE=4 SV=2	112.7	103	86.8	114.8	92	123.9	89.3
E2RGN6	Uncharacterized protein OS=Canis lupus familiaris GN=PHB2 PE=4 SV=2	665.9	898.6	587.5	549.5	583.7	651.2	545.5
E2RGP2	Uncharacterized protein OS=Canis lupus familiaris GN=SERPINB6 PE=3 SV=2	619.7	743.6	232.4	253.5	229.3	188.4	261
E2RGP6	Uncharacterized protein OS=Canis lupus familiaris GN=TSG101 PE=4 SV=2	109.1	106	106.3	130.3	128.1	164.1	109.4
E2RGQ5	Uncharacterized protein OS=Canis lupus familiaris GN=RPS10 PE=4 SV=1	334.6	339.8	316.7	287.9	317.9	309.8	336.6
E2RGQ8	Uncharacterized protein OS=Canis lupus familiaris PE=4 SV=2	150.9	143.3	232	205.5	298.3	151.3	245.6
E2RGR7	Uncharacterized protein OS=Canis lupus familiaris GN=CCDC80 PE=4 SV=2	94.5	58.7	346	398.2	330	261.8	430.4
E2RGR9	Uncharacterized protein OS=Canis lupus familiaris GN=FH PE=3 SV=1	401.7	446.5	300	352.6	372.4	389.2	369.9
E2RGT2	Uncharacterized protein OS=Canis lupus familiaris GN=TMCO1 PE=4 SV=2	322.7	269.1	169.8	179.6	183.3	178.2	187.8
E2RGT6	Uncharacterized protein OS=Canis lupus familiaris GN=C6 PE=4 SV=2	149.3	110.5	274	229.8	240.2	184.4	244.2
E2RGT8	Uncharacterized protein OS=Canis lupus familiaris GN=VAV1 PE=4 SV=1	357.4	224.2	255.1	286.9	264.2	416.7	216.5
E2RGZ3	Uncharacterized protein OS=Canis lupus familiaris GN=IDE PE=3 SV=2	236.7	164	202	232.3	247.9	265.6	216.6
E2RGZ5	Uncharacterized protein OS=Canis lupus familiaris GN=TMED2 PE=3 SV=1	284.8	242.6	366.6	425.8	407.9	447.1	393.6
E2RGZ8	Uncharacterized protein OS=Canis lupus familiaris GN=APPL2 PE=4 SV=2	387.3	386.5	433.3	469.4	488.4	535.2	445.1
E2RGZ9	Uncharacterized protein OS=Canis lupus familiaris PE=4 SV=1	117.6	125.7	78	85.9	98.5	105.1	90
E2RH08	Oxysterol-binding protein OS=Canis lupus familiaris GN=OSBPL10 PE=3 SV=2	34.1	35.1	45.4	33.8	45.8	35.9	42
E2RH09	Uncharacterized protein OS=Canis lupus familiaris GN=SSB PE=4 SV=2	449.8	315.8	328.5	300.8	396.5	333.4	483.5
E2RH18	Uncharacterized protein OS=Canis lupus familiaris GN=CFP PE=4 SV=1	179.5	192.2	467.2	435.2	427.6	335.2	484.3
E2RH35	Uncharacterized protein OS=Canis lupus familiaris GN=USP8 PE=3 SV=2	305.8	300.4	256.4	293.8	255.8	281.6	234.1
E2RH37	GTP:AMP phosphotransferase AK3, mitochondrial OS=Canis lupus familiaris GN=LOC480491 PE=3 SV=1	230.4	343.9	335.8	285.3	339.9	226.3	409.8
E2RH47	40S ribosomal protein S3 OS=Canis lupus familiaris GN=RPS3 PE=1 SV=1	581.1	504.9	658.5	668.6	713.7	772.8	649.4
E2RH48	Uncharacterized protein OS=Canis lupus familiaris GN=PSMC4 PE=3 SV=1	675.2	1239.2	1394.5	1270.4	1343.4	1005.1	1520
E2RH59	Glucosamine-6-phosphate isomerase OS=Canis lupus familiaris GN=GNPDA2 PE=3 SV=2	131.4	297	100.1	129.7	127.6	87.5	140.4
E2RH71	Uncharacterized protein OS=Canis lupus familiaris GN=DYNC1LI1 PE=4 SV=1	143	144.3	103.6	120.7	126.8	128.3	115.5
E2RH73	Uncharacterized protein OS=Canis lupus familiaris GN=ANKRD33B PE=4 SV=1	219.8	751.8	225.8	237.2	301.8	148.4	174.9
E2RH80	Uncharacterized protein OS=Canis lupus familiaris GN=PDGFRL PE=4 SV=1	170.5	90.5	168.3	205.3	176.5	115.2	209.2
E2RH87	Uncharacterized protein OS=Canis lupus familiaris GN=EIF4G3 PE=4 SV=2	180.6	123.3	197.9	175.8	194.8	313.1	167.7
E2RH91	Uncharacterized protein OS=Canis lupus familiaris GN=SND1 PE=4 SV=2	811.3	693.5	914.2	921.7	970.2	1029.3	859.7
E2RH95	SH3 domain-binding glutamic acid-rich-like protein OS=Canis lupus familiaris GN=SH3BGRL PE=3 SV=2	50.3	108.7	125.4	154.8	142.2	83.8	162
E2RHA5	Uncharacterized protein OS=Canis lupus familiaris GN=LETM1 PE=4 SV=2	954.4	580.3	476.6	538.1	631.4	714	480.4
E2RHB3	Uncharacterized protein OS=Canis lupus familiaris GN=API5 PE=4 SV=1	171.8	341.3	192.8	328.3	234	221.4	230.7
E2RHD4	Uncharacterized protein OS=Canis lupus familiaris GN=GIMAP4 PE=4 SV=2	298.8	232.1	209.1	234.3	247.2	469.1	220.8
E2RHG2	Uncharacterized protein OS=Canis lupus familiaris GN=PRDX1 PE=4 SV=1	1401.6	2177.6	1066	1140.7	1076.7	1021.3	1207.2
E2RHG5	Uncharacterized protein OS=Canis lupus familiaris GN=NUDT3 PE=4 SV=1	226.6	336	126.3	129.5	155.8	124.2	139.9
E2RHH8	ATP synthase subunit d, mitochondrial OS=Canis lupus familiaris PE=3 SV=1	342.4	1029.4	386.2	350.7	353.4	400.7	427.9
E2RHJ7	Uncharacterized protein OS=Canis lupus familiaris GN=GORASP2 PE=4 SV=1	136.1	130.7	268.7	256.3	282.5	253.4	264.2
E2RHK0	Oxysterol-binding protein OS=Canis lupus familiaris GN=OSBPL2 PE=3 SV=2	328.6	232.6	199.6	150.3	157	158.8	202.6
E2RHL0	Uncharacterized protein OS=Canis lupus familiaris GN=UQCRC2 PE=3 SV=2	1155.8	1417.7	902.7	964.3	940.6	1288.3	877.5
E2RHL4	Uncharacterized protein OS=Canis lupus familiaris GN=ARF6 PE=3 SV=1	223.4	254.3	298.5	326.1	288.2	305.6	293.2
E2RHM4	Isocitrate dehydrogenase [NAD] subunit, mitochondrial OS=Canis lupus familiaris GN=IDH3A PE=3 SV=1	749	878.1	362.6	341.8	353.7	395.1	427.2
E2RHN1	Uncharacterized protein OS=Canis lupus familiaris GN=GRN PE=4 SV=2	46.1	47.5	124.8	154.2	110.1	138.6	150.5
E2RHP7	Uncharacterized protein OS=Canis lupus familiaris GN=LRRFIP2 PE=4 SV=2	206.2	174.1	231.3	222.7	242.3	297	285.2
E2RHQ5	Uncharacterized protein OS=Canis lupus familiaris GN=TRAPPC13 PE=4 SV=2	249	144	165.7	288.1	169.8	311.5	151.6
E2RHR2	Uncharacterized protein OS=Canis lupus familiaris GN=EPB41L3 PE=4 SV=2	43.1	93.8	58.3	47.5	45.7	25.2	81.3
E2RHR4	Uncharacterized protein OS=Canis lupus familiaris GN=EPB41L3 PE=4 SV=1	593.6	898.6	444.7	445.1	462.5	372.4	500.7
E2RHR7	Tyrosine--tRNA ligase OS=Canis lupus familiaris GN=YARS PE=3 SV=2	686.1	632.3	726.9	745.1	742.5	605.9	703.7
E2RHV6	Uncharacterized protein OS=Canis lupus familiaris GN=NCK1 PE=4 SV=1	53.3	93	96	90.3	101.6	92.9	81.9
E2RHV9	Uncharacterized protein OS=Canis lupus familiaris GN=COX5B PE=4 SV=1	230.2	516.1	306.8	297.5	313.1	282.8	284
E2RHW7	Uncharacterized protein OS=Canis lupus familiaris GN=TARS PE=3 SV=1	396	341.3	403.3	422.5	427.3	407.4	446.2
E2RHX6	Uncharacterized protein OS=Canis lupus familiaris GN=ACTR1B PE=3 SV=1	488.1	332	164	200.2	199.5	191.3	212
E2RHZ8	Uncharacterized protein OS=Canis lupus familiaris GN=ATP6V1H PE=4 SV=1	309.7	304.2	175.2	183.5	156.7	170.7	155
E2RI02	Uncharacterized protein OS=Canis lupus familiaris GN=MAP6 PE=4 SV=2	252	609.8	142.8	157.4	152.8	133.8	184
E2RI74	Uncharacterized protein OS=Canis lupus familiaris GN=PLAA PE=4 SV=2	340.8	253.9	195.8	243.5	250.5	286.2	220.7
E2RI87	Signal transducer and activator of transcription OS=Canis lupus familiaris GN=STAT1 PE=3 SV=2	585.5	494.7	405	428.6	464	655	441.8
E2RIA5	Uncharacterized protein OS=Canis lupus familiaris GN=RAB3A PE=4 SV=2	760.2	795.5	387.2	314.2	513.1	300	366.4
E2RIA8	Uncharacterized protein OS=Canis lupus familiaris GN=RPL8 PE=3 SV=1	384	229.3	222.5	242.2	217.7	234.4	229.3
E2RIG0	NADH dehydrogenase [ubiquinone] 1 alpha subcomplex subunit 10, mitochondrial OS=Canis lupus familiaris GN=NDUFA10 PE=3 SV=2	448.6	483.8	232	228.8	233	297.9	226.5
E2RIH9	Uncharacterized protein OS=Canis lupus familiaris GN=ADPGK PE=4 SV=2	272.3	226.5	464.4	529.2	499.8	424.5	442.5
E2RII4	Uncharacterized protein OS=Canis lupus familiaris GN=EML2 PE=4 SV=2	233.4	396.3	252.6	283.9	269.3	270.7	259.9
E2RIJ6	Uncharacterized protein OS=Canis lupus familiaris GN=EEF2K PE=4 SV=1	239.8	181.6	164.9	174.5	191.8	191	174.2
E2RIL1	Uncharacterized protein OS=Canis lupus familiaris GN=SYNE3 PE=4 SV=2	123.9	81.2	181.4	231.6	225.1	248.8	173.6
E2RIM1	Uncharacterized protein OS=Canis lupus familiaris GN=NCF4 PE=4 SV=2	463.4	468.1	259.6	364	305.1	448	239.8
E2RIN6	Uncharacterized protein OS=Canis lupus familiaris GN=ECE2 PE=4 SV=2	262	212.7	93.9	106	118.7	258.7	118.6
E2RIP2	Uncharacterized protein OS=Canis lupus familiaris GN=SMYD1 PE=4 SV=1	201.5	106	251.9	206.6	273.4	1066.1	213.9
E2RIQ2	Uncharacterized protein OS=Canis lupus familiaris GN=CTTN PE=4 SV=2	745.3	590.8	721.7	864.6	852.9	666.2	1030.2
E2RIQ3	Uncharacterized protein OS=Canis lupus familiaris GN=PCSK1N PE=4 SV=1	221	302.5	217.8	111.5	112.6	101.3	103.8
E2RIU2	Uncharacterized protein OS=Canis lupus familiaris GN=CHMP2A PE=4 SV=1	213	243.1	118.6	119.3	151.4	145.7	165.4
E2RIU5	Uncharacterized protein OS=Canis lupus familiaris GN=UBE2M PE=3 SV=1	414.7	317.9	271.6	261	260.5	241	241.7
E2RIV1	AP complex subunit beta OS=Canis lupus familiaris GN=AP2B1 PE=3 SV=2	1059.8	894.9	713.8	801.6	772.5	754.4	765.8
E2RIV2	Uncharacterized protein OS=Canis lupus familiaris GN=COMMD5 PE=4 SV=1	275.2	300.7	218.5	267.9	240.3	243.8	230.9
E2RIV3	Serine hydroxymethyltransferase OS=Canis lupus familiaris GN=SHMT1 PE=3 SV=2	200.7	279.6	197	176.2	191.9	156.9	247
E2RIV7	Uncharacterized protein OS=Canis lupus familiaris GN=SNTA1 PE=4 SV=2	317.3	341.7	192.7	173.9	189.5	194.7	179.5
E2RIW7	Uncharacterized protein OS=Canis lupus familiaris GN=SNRPD1 PE=4 SV=1	408.3	290.2	257.3	355.6	353.8	260.2	262.8
E2RIX2	Uncharacterized protein OS=Canis lupus familiaris GN=HNRNPD PE=4 SV=2	191.6	235.4	251.1	361.5	302.9	255.8	351.3
E2RIY2	Claudin OS=Canis lupus familiaris GN=CLDN11 PE=3 SV=1	807.6	2792.3	202.8	226.5	225.3	221.5	306.6
E2RJ04	Uncharacterized protein OS=Canis lupus familiaris PE=4 SV=2	247.5	367.9	63.9	55.5	51.8	83.9	61
E2RJ06	40S ribosomal protein SA OS=Canis lupus familiaris GN=RPSA PE=3 SV=2	442.1	432.4	639.8	679.9	675.9	660.6	735.1
E2RJ12	Sorting nexin OS=Canis lupus familiaris GN=SNX18 PE=3 SV=1	139.1	215.9	129.1	156.2	172.3	120.4	185.8
E2RJ14	Neuropilin OS=Canis lupus familiaris GN=NRP2 PE=3 SV=2	151.5	127.1	205	219.8	233.1	190.5	209.7
E2RJ26	Uncharacterized protein OS=Canis lupus familiaris GN=PSMD11 PE=4 SV=2	236.7	161.2	162.3	162.3	184.5	208.5	161.9
E2RJ29	Uncharacterized protein OS=Canis lupus familiaris GN=DRG2 PE=4 SV=1	87.8	106.7	60.3	107.7	81.6	110	59.2
E2RJ35	Uncharacterized protein OS=Canis lupus familiaris GN=TFAM PE=4 SV=2	130.1	239	38.8	36.9	43.7	32.3	57.8
E2RJ37	Uncharacterized protein OS=Canis lupus familiaris GN=GORASP1 PE=4 SV=2	86	91.2	220.4	188.2	180.8	118.3	248
E2RJ50	Uncharacterized protein OS=Canis lupus familiaris GN=WDR48 PE=4 SV=1	138.9	126	65.6	76.9	87.9	84.7	84.4
E2RJ54	Uncharacterized protein OS=Canis lupus familiaris PE=4 SV=2	279.1	306.7	445.8	458	502.6	491.1	543
E2RJ59	Serine/threonine-protein phosphatase OS=Canis lupus familiaris GN=PPP3CB PE=3 SV=2	132.5	80.4	93	107.1	93.1	125.1	95.4
E2RJ62	Uncharacterized protein OS=Canis lupus familiaris GN=GPT PE=4 SV=2	1110.7	1233.2	397.7	401.7	414.2	413.4	380.1
E2RJ67	Uncharacterized protein OS=Canis lupus familiaris GN=TIMM29 PE=4 SV=2	229.4	118.5	101	100.9	113.7	158.5	89.9
E2RJ79	Uncharacterized protein OS=Canis lupus familiaris GN=HSD17B12 PE=3 SV=1	276.1	165.1	155.7	175.8	160.9	159	151.8
E2RJ93	Uncharacterized protein OS=Canis lupus familiaris GN=GLS PE=3 SV=2	565.7	431.2	254.3	291.4	275.1	351	257.4
E2RJ94	Uncharacterized protein OS=Canis lupus familiaris GN=PTGES3L-AARSD1 PE=4 SV=2	216.6	185.3	142.8	144.8	165.8	176.2	144.5
E2RJA0	Uncharacterized protein OS=Canis lupus familiaris GN=PAK2 PE=4 SV=1	488.5	469.7	270.6	266.3	302.1	463.4	299.5
E2RJA5	Uncharacterized protein OS=Canis lupus familiaris GN=GDPD1 PE=4 SV=2	492.8	460.8	200	187.6	216	235.7	283
E2RJB9	Uncharacterized protein OS=Canis lupus familiaris GN=DNAJC5 PE=4 SV=2	929.1	816.6	1461.8	1502	1133.1	1329.4	1367.8
E2RJC2	Uncharacterized protein OS=Canis lupus familiaris GN=C1QC PE=4 SV=1	861.8	759.4	1632.1	1565	1570.8	1237	1303.8
E2RJE0	Uncharacterized protein OS=Canis lupus familiaris GN=COMP PE=4 SV=2	404.2	348.8	1104.4	1830.5	1091.3	1166.3	2681.9
E2RJF4	Sulfurtransferase OS=Canis lupus familiaris GN=TST PE=4 SV=2	367.3	572.8	158.4	131.7	181.1	126.8	202.5
E2RJG0	Uncharacterized protein OS=Canis lupus familiaris GN=CCDC43 PE=4 SV=1	229.3	175.5	137	146.8	182.7	163.8	170.3
E2RJG1	Uncharacterized protein OS=Canis lupus familiaris GN=ARMCX3 PE=4 SV=2	235.6	245.9	371.3	320.6	309.1	452.4	316.7
E2RJK1	Uncharacterized protein OS=Canis lupus familiaris GN=SH3BP1 PE=4 SV=2	326.3	271.1	330.8	404	392	462.3	368.1
E2RJL1	Galectin OS=Canis lupus familiaris GN=LGALS1 PE=2 SV=1	606	1374.7	1060	1168.6	1001.3	1053.3	1283
E2RJL2	Uncharacterized protein OS=Canis lupus familiaris GN=TMEM205 PE=4 SV=1	106.8	110.5	115.4	115	142.7	108.7	100.4
E2RJL3	Uncharacterized protein OS=Canis lupus familiaris GN=SRSF1 PE=4 SV=2	119.3	228.6	203.3	164.1	216.2	189.8	346.3
E2RJM9	Uncharacterized protein OS=Canis lupus familiaris GN=PLVAP PE=4 SV=2	198.8	136.2	301.7	327.1	322	396.1	296.1
E2RJN7	Uncharacterized protein OS=Canis lupus familiaris GN=CCDC34 PE=4 SV=2	205.8	115.1	101.4	117.5	134.1	96.1	132.5
E2RJQ8	Uncharacterized protein OS=Canis lupus familiaris GN=ATP6V0D1 PE=4 SV=1	260.7	209	203.5	254.3	217.7	312.4	159.2
E2RJR2	Uncharacterized protein OS=Canis lupus familiaris GN=NDUFA9 PE=4 SV=2	581.7	649.6	727.7	506.9	644.8	511.7	558.7
E2RJS7	Uncharacterized protein OS=Canis lupus familiaris GN=NEXN PE=4 SV=2	107.4	80.8	108.9	158.8	147.1	225.3	124.3
E2RJT2	Uncharacterized protein OS=Canis lupus familiaris GN=BST1 PE=4 SV=2	282.3	353.7	273.4	392.7	269.4	207.2	240.4
E2RJU3	Uncharacterized protein OS=Canis lupus familiaris GN=EIF5 PE=4 SV=1	345.8	357.2	242.3	226.5	226.9	238.3	281.6
E2RJV3	Uncharacterized protein OS=Canis lupus familiaris GN=TIPRL PE=4 SV=1	482.4	447.9	378.9	375.8	411.2	389.3	312.2
E2RJW7	Uncharacterized protein OS=Canis lupus familiaris GN=ADD1 PE=4 SV=2	1114.9	965.3	1117.1	1097.3	1103.6	810.6	1063.6
E2RJW8	Uncharacterized protein OS=Canis lupus familiaris GN=PGRMC1 PE=3 SV=1	375.6	529.9	384.7	383.4	345.7	348	393.2
E2RJY0	Uncharacterized protein OS=Canis lupus familiaris GN=KCTD12 PE=4 SV=1	403.1	360.5	369.9	423.7	537.8	333.8	424.4
E2RJZ5	Uncharacterized protein OS=Canis lupus familiaris GN=SCRN3 PE=4 SV=2	279.5	246.1	148.4	195.4	176.1	151.4	159.3
E2RK00	Uncharacterized protein OS=Canis lupus familiaris GN=DYNLL1 PE=4 SV=1	699	599.3	394.1	523.2	473.6	633.2	451.6
E2RK02	Uncharacterized protein OS=Canis lupus familiaris GN=GPLD1 PE=4 SV=2	224.2	148	334.3	270	251.5	224.9	263
E2RK07	Uncharacterized protein OS=Canis lupus familiaris GN=EXOC1 PE=4 SV=2	320.3	208.4	302.8	269	253.2	212.5	251.9
E2RK13	Protein XRP2 OS=Canis lupus familiaris GN=RP2 PE=3 SV=1	165.6	226.4	283.9	307.3	353.2	320.4	291.7
E2RK29	Uncharacterized protein OS=Canis lupus familiaris GN=VPS25 PE=4 SV=2	633.4	434.2	569.2	543.2	542.9	842.5	530.7
E2RK37	Uncharacterized protein OS=Canis lupus familiaris GN=RAB3GAP1 PE=4 SV=2	127.2	87.3	70.1	76.7	73.5	88.4	53.6
E2RK64	Uncharacterized protein OS=Canis lupus familiaris GN=FERMT3 PE=4 SV=1	342.4	241.1	605.1	608.3	605.7	642.2	472.4
E2RK67	Uncharacterized protein OS=Canis lupus familiaris GN=TMX1 PE=4 SV=2	143.9	124.1	182.3	243.7	216.2	239.1	202.6
E2RK77	Uncharacterized protein OS=Canis lupus familiaris GN=TPD52L2 PE=4 SV=2	341.9	443.3	514.4	537.5	513.8	448.4	560.9
E2RKA1	Tyrosine-protein kinase receptor OS=Canis lupus familiaris GN=NTRK2 PE=3 SV=2	351.9	120.7	101.8	117.9	111.6	156.7	99.8
E2RKG3	Uncharacterized protein OS=Canis lupus familiaris GN=TOMM70 PE=4 SV=2	497.1	475.4	277.5	281.2	297	344	309.9
E2RKJ1	Uncharacterized protein OS=Canis lupus familiaris GN=CCAR2 PE=4 SV=2	526.9	478.7	467.4	537.3	556	633.2	548.9
E2RKJ6	Uncharacterized protein OS=Canis lupus familiaris GN=SERPINB1 PE=3 SV=1	199.7	277	67.7	71	72.5	88.3	72.2
E2RKK6	Uncharacterized protein OS=Canis lupus familiaris GN=PRKCSH PE=4 SV=2	541	452.2	615.8	686.4	659.4	727.3	793.3
E2RKL5	Uncharacterized protein OS=Canis lupus familiaris GN=LEMD2 PE=4 SV=2	67.9	42.5	110.4	100.1	106.5	131.7	70.1
E2RKN5	Uncharacterized protein OS=Canis lupus familiaris GN=EDC4 PE=4 SV=2	169.1	99.7	141.7	143.1	143.7	154.6	125.7
E2RKQ0	Protein phosphatase methylesterase 1 OS=Canis lupus familiaris GN=PPME1 PE=3 SV=2	572.3	284.1	231.1	262.8	306.1	259.5	268
E2RKQ1	LIM and senescent cell antigen-like-containing domain protein OS=Canis lupus familiaris GN=LIMS1 PE=4 SV=2	172.4	253.5	318.2	241	307.7	206.7	363.1
E2RKQ6	Uncharacterized protein OS=Canis lupus familiaris GN=LGALS3BP PE=4 SV=1	221.9	156.3	161.9	155.2	159.5	184	183.4
E2RKR0	Uncharacterized protein OS=Canis lupus familiaris GN=IKBKB PE=4 SV=1	177	106.2	149.6	157.2	162.5	184.2	158.6
E2RKR4	Proteasome subunit alpha type OS=Canis lupus familiaris GN=PSMA3 PE=3 SV=1	790.6	683	517.1	540	583.4	538.9	549
E2RKR6	Uncharacterized protein OS=Canis lupus familiaris GN=FIBIN PE=4 SV=2	41.5	38.7	143.6	155.2	116.8	72.9	216.6
E2RKS8	Uncharacterized protein OS=Canis lupus familiaris GN=PIGO PE=4 SV=1	232.5	182.2	166.4	195.8	191.3	172.2	180.2
E2RKT9	Uncharacterized protein OS=Canis lupus familiaris GN=UBE2L3 PE=3 SV=1	135.9	173.2	128.9	187.2	173.7	180.4	147.3
E2RKV3	Uncharacterized protein OS=Canis lupus familiaris GN=SPTLC1 PE=4 SV=2	117.1	61.4	45.4	57.3	71	100.6	51.4
E2RKV4	Transporter OS=Canis lupus familiaris GN=SLC6A11 PE=3 SV=1	218.4	267.3	54	44.9	57.3	42.9	60.1
E2RKY4	Uncharacterized protein OS=Canis lupus familiaris GN=MUT PE=4 SV=1	392.7	274.8	277.5	277.3	300.3	328.3	263.7
E2RL03	ATP synthase-coupling factor 6, mitochondrial OS=Canis lupus familiaris GN=ATP5J PE=3 SV=2	353.9	701.9	163	148.2	159.9	255.8	191
E2RL06	Uncharacterized protein OS=Canis lupus familiaris GN=LOC481017 PE=4 SV=1	271.4	272.7	181.4	177.4	398.7	208.4	183.4
E2RL11	Uncharacterized protein OS=Canis lupus familiaris GN=NCOA5 PE=4 SV=1	205.9	170.2	198.5	236.1	252.9	273.7	242.9
E2RL17	Uncharacterized protein OS=Canis lupus familiaris GN=EIF2S1 PE=4 SV=1	264.8	201.2	268.4	304.2	292.1	323.2	288.3
E2RL34	60S ribosomal protein L18a OS=Canis lupus familiaris GN=RPL18A PE=3 SV=1	170	156.2	316.9	269.6	317	324.9	325.5
E2RL48	Uncharacterized protein OS=Canis lupus familiaris GN=SUN2 PE=4 SV=2	335.2	302.9	338.3	374.4	361.2	410.5	295.4
E2RL53	Uncharacterized protein OS=Canis lupus familiaris GN=TGOLN2 PE=4 SV=2	293.6	146	131.6	129.3	148.8	194.1	149.4
E2RL57	Uncharacterized protein OS=Canis lupus familiaris GN=BCAS2 PE=4 SV=1	31.8	46.5	55.8	83.2	70.5	92.2	65.1
E2RL65	Uncharacterized protein OS=Canis lupus familiaris GN=SF3B2 PE=4 SV=2	349.6	239.2	383.6	410.1	412	418.3	459.1
E2RL77	Uncharacterized protein OS=Canis lupus familiaris GN=TNS1 PE=4 SV=2	421.2	411.5	633.2	563	618	789	602.5
E2RL80	Uncharacterized protein OS=Canis lupus familiaris GN=PRELP PE=4 SV=1	1006	995.1	3316.9	2379.1	2535.5	1235.6	3653.7
E2RL81	Uncharacterized protein OS=Canis lupus familiaris GN=UPF1 PE=4 SV=2	183.5	173.2	317.3	323.8	329.8	356.2	374
E2RL88	Uncharacterized protein OS=Canis lupus familiaris GN=ITGA6 PE=3 SV=2	114.8	92.3	242.5	215.5	247.9	214.7	297.1
E2RL90	Pyruvate dehydrogenase E1 component subunit alpha OS=Canis lupus familiaris GN=PDHA1 PE=4 SV=1	614.7	529.6	394.3	438	432.4	448.9	388.3
E2RL92	Uncharacterized protein OS=Canis lupus familiaris GN=MATR3 PE=4 SV=2	321.1	254.3	964.2	814.6	675.3	625.6	719.3
E2RL95	Uncharacterized protein OS=Canis lupus familiaris GN=UPF2 PE=4 SV=2	285.8	214.1	323.3	308.3	262	277.3	302.2
E2RL97	Uncharacterized protein OS=Canis lupus familiaris GN=CNPY4 PE=4 SV=2	481.6	264.5	451.5	643.8	545.3	496.5	479
E2RLA5	Uncharacterized protein OS=Canis lupus familiaris GN=GOLM1 PE=4 SV=2	73.1	88.3	164.4	139.9	180	148.1	168.2
E2RLA8	Uncharacterized protein OS=Canis lupus familiaris GN=PAFAH1B3 PE=4 SV=2	157.4	179.1	112.4	138.9	115.9	340.1	133.6
E2RLB2	Uncharacterized protein OS=Canis lupus familiaris GN=RALB PE=4 SV=1	77.5	69.8	121.8	97.3	104.5	105.5	104
E2RLB3	Peptidylprolyl isomerase OS=Canis lupus familiaris GN=FKBP5 PE=4 SV=1	449.7	332	407	463.3	462.7	362.9	502.1
E2RLB4	Uncharacterized protein OS=Canis lupus familiaris PE=4 SV=2	158.7	100.8	133.1	201.3	166.3	218.2	131.1
E2RLB8	Uncharacterized protein OS=Canis lupus familiaris GN=P4HA1 PE=4 SV=2	218.9	170.7	295.2	316.5	318.6	245.5	382.9
E2RLE7	Uncharacterized protein OS=Canis lupus familiaris GN=CTCFL PE=4 SV=1	208.3	213.7	370.5	405	302.7	283.9	270.8
E2RLF1	Uncharacterized protein OS=Canis lupus familiaris GN=PSAP PE=4 SV=1	782.5	665.8	768.7	1025.3	853	870.3	730.7
E2RLG2	Uncharacterized protein OS=Canis lupus familiaris GN=GNAO1 PE=4 SV=2	1128	1740.6	314.5	323.6	330.2	278.6	334.2
E2RLH6	Uncharacterized protein OS=Canis lupus familiaris GN=LOC609402 PE=3 SV=2	1191	612.8	2950.5	2974.7	3480.6	1829.9	1942.6
E2RLJ3	Uncharacterized protein OS=Canis lupus familiaris GN=LSM12 PE=4 SV=2	72.2	141.1	144.5	98.1	161.9	95.7	140.6
E2RLL6	Uncharacterized protein OS=Canis lupus familiaris GN=CCT6A PE=3 SV=2	849	872.1	653.7	653.8	633.3	568.2	619.2
E2RLM0	Uncharacterized protein OS=Canis lupus familiaris GN=CADPS PE=4 SV=2	408.8	302.2	113	113.2	126.5	117	124.6
E2RLM7	Uncharacterized protein OS=Canis lupus familiaris GN=PGM2L1 PE=4 SV=2	149.6	107.8	54.7	59.5	41.3	42.7	32.5
E2RLN1	Uncharacterized protein OS=Canis lupus familiaris GN=SERPIND1 PE=3 SV=1	418.9	385.8	630.4	654.6	509.3	328.8	581.1
E2RLP0	Uncharacterized protein OS=Canis lupus familiaris GN=RAB35 PE=4 SV=2	197	233.3	192.1	197	202	183	179.4
E2RLP4	Uncharacterized protein OS=Canis lupus familiaris GN=CDC5L PE=4 SV=1	158.4	173.4	273.4	234.7	298	237.9	304.1
E2RLQ4	Uncharacterized protein OS=Canis lupus familiaris PE=4 SV=2	448.8	345.4	593.9	593.6	611.2	706.2	688.3
E2RLQ6	Uncharacterized protein OS=Canis lupus familiaris GN=PGLS PE=4 SV=1	494.8	460.2	435.9	472.7	473.1	400.1	522.7
E2RLQ9	Uncharacterized protein OS=Canis lupus familiaris GN=VCP PE=3 SV=2	1499	1731.6	1395.1	1374.8	1464.8	1370.6	1475.5
E2RLS2	Uncharacterized protein OS=Canis lupus familiaris GN=FRYL PE=4 SV=2	158.2	185.3	106.1	109.7	107.4	151.3	103.2
E2RLS3	Uncharacterized protein OS=Canis lupus familiaris GN=HSP90AB1 PE=3 SV=2	2038.6	1818.1	1126.7	1151.9	1170	1363.7	1278.1
E2RLU1	Uncharacterized protein OS=Canis lupus familiaris GN=DPM3 PE=4 SV=2	98.1	84.1	111.1	128.3	137.8	150.2	102.5
E2RLU9	Uncharacterized protein OS=Canis lupus familiaris GN=QDPR PE=4 SV=1	1980.7	1418.9	788.2	688.6	881.9	612.9	815.7
E2RLX7	Uncharacterized protein OS=Canis lupus familiaris GN=RAB2B PE=4 SV=2	114.1	157.3	46.3	43.4	44.9	36.5	51
E2RLX8	Uncharacterized protein OS=Canis lupus familiaris GN=TRPV2 PE=3 SV=2	108.9	79.2	130.1	123.8	128.9	107.5	126.9
E2RLY5	Uncharacterized protein OS=Canis lupus familiaris GN=LAP3 PE=3 SV=2	467.6	728.4	451.5	540.8	512.3	689.6	547
E2RLZ3	Uncharacterized protein OS=Canis lupus familiaris GN=CROT PE=3 SV=1	81.6	59.5	31.3	20	21.7	23.1	15
E2RLZ8	Uncharacterized protein OS=Canis lupus familiaris GN=MGEA5 PE=4 SV=1	615.4	366	200.7	254.9	246.7	264.9	224.4
E2RLZ9	Uncharacterized protein OS=Canis lupus familiaris GN=ABHD14B PE=4 SV=1	590.5	680	591.6	761	658.1	618.4	655.1
E2RM09	Uncharacterized protein OS=Canis lupus familiaris GN=DNAJA1 PE=3 SV=1	213.3	282.3	111.1	87.9	123	105.4	144.6
E2RM11	Uncharacterized protein OS=Canis lupus familiaris GN=NUCB2 PE=4 SV=2	306.6	257.7	567.1	700.7	694	776.5	782.8
E2RM16	Uncharacterized protein OS=Canis lupus familiaris GN=NFASC PE=4 SV=1	1258.7	1179.6	451.8	487.4	477.8	547	417.7
E2RM20	Dihydrolipoamide acetyltransferase component of pyruvate dehydrogenase complex OS=Canis lupus familiaris GN=PDHX PE=3 SV=1	128.2	159.2	57.7	57.7	79.5	193.2	76.3
E2RM34	Uncharacterized protein OS=Canis lupus familiaris GN=SLC30A3 PE=4 SV=1	84	44.5	85.8	108.1	203.6	110.7	105.3
E2RM44	Uncharacterized protein OS=Canis lupus familiaris GN=B4GAT1 PE=4 SV=1	247.9	266.6	201.8	277.7	210.4	161.7	306.6
E2RM53	Uncharacterized protein OS=Canis lupus familiaris GN=SNX27 PE=4 SV=1	116	110.9	137.2	139.7	149.7	107.1	151.8
E2RM54	Polypeptide N-acetylgalactosaminyltransferase OS=Canis lupus familiaris GN=GALNT1 PE=3 SV=2	166.3	95.6	213.5	261.4	272.2	322.7	264.6
E2RM58	DCN1-like protein OS=Canis lupus familiaris GN=DCUN1D3 PE=4 SV=1	145.7	114.5	111.7	146.4	128.7	136.9	125.7
E2RM61	Uncharacterized protein OS=Canis lupus familiaris PE=4 SV=2	662	477.3	518	518.2	524	564.3	442.9
E2RM65	Uncharacterized protein OS=Canis lupus familiaris GN=MTFR1L PE=4 SV=2	43.4	49.7	73.8	61.2	67.5	61.4	49.4
E2RM67	Uncharacterized protein OS=Canis lupus familiaris GN=RBBP7 PE=4 SV=1	525.7	387.1	578.3	584.4	560.5	691	609.1
E2RM92	Uncharacterized protein OS=Canis lupus familiaris GN=DYNC1I2 PE=4 SV=2	577.2	392.9	376.3	381.9	395.9	382.4	374
E2RM98	Uncharacterized protein OS=Canis lupus familiaris GN=DSCR3 PE=4 SV=2	120.1	77.7	106.6	112.2	107.2	117.8	118.2
E2RMA1	Uncharacterized protein OS=Canis lupus familiaris GN=TPT1 PE=3 SV=1	397.8	490.9	292.9	257.1	294.7	282.5	382.5
E2RMA3	Uncharacterized protein OS=Canis lupus familiaris GN=SPARC PE=4 SV=1	381.7	361.3	529.6	554.6	571.8	445	647.7
E2RMB7	Uncharacterized protein OS=Canis lupus familiaris GN=MYOT PE=4 SV=2	82.8	32.7	68.6	60.8	55.8	1117.1	52.1
E2RMB9	N-Myc downstream regulated gene 1 OS=Canis lupus familiaris GN=NDRG1 PE=2 SV=1	349.6	396.3	209	243.5	231.4	172.7	263.8
E2RMC1	Uncharacterized protein OS=Canis lupus familiaris GN=ST13 PE=4 SV=2	884.5	886.5	514.4	507.7	564.6	541.1	606.4
E2RMC8	Uncharacterized protein OS=Canis lupus familiaris GN=PHLDB1 PE=4 SV=2	80	70.1	374.8	391.3	344.2	273.1	361
E2RMH7	Uncharacterized protein OS=Canis lupus familiaris GN=CCDC51 PE=4 SV=1	73.3	87.1	51	43	51.6	58.9	50.5
E2RMI3	Uncharacterized protein OS=Canis lupus familiaris GN=ABI1 PE=4 SV=2	297	378.4	546.5	376.6	426.6	336.3	581.5
E2RMK6	Uncharacterized protein OS=Canis lupus familiaris GN=EIF2S3 PE=4 SV=1	699.3	571.9	581	613	621.4	676.6	623.9
E2RMM0	Uncharacterized protein OS=Canis lupus familiaris GN=GOSR2 PE=3 SV=1	200.6	97.9	197.2	180.9	225.4	210	167.2
E2RMN1	Uncharacterized protein OS=Canis lupus familiaris GN=CUL4B PE=3 SV=2	352.3	252.7	221	186.6	194.7	198	173.5
E2RMN2	Proteasome subunit alpha type OS=Canis lupus familiaris GN=PSMA6 PE=3 SV=1	907.4	795.3	706.9	755.3	715.1	706.6	790.8
E2RMN6	Uncharacterized protein OS=Canis lupus familiaris GN=SERBP1 PE=4 SV=2	294.3	476.9	446.2	514.5	505.3	466.7	502.9
E2RMR3	Uncharacterized protein OS=Canis lupus familiaris GN=HNRNPM PE=4 SV=2	367.7	396.8	441.3	358.5	499.4	375.2	486.6
E2RMS9	Uncharacterized protein OS=Canis lupus familiaris GN=XRN2 PE=4 SV=1	240.4	145.6	194	211.9	240.6	276.4	202.3
E2RMT4	Uncharacterized protein OS=Canis lupus familiaris GN=ARPC1B PE=4 SV=1	410.6	331.1	538.4	625.2	613.7	678	564.8
E2RMT7	GMP reductase OS=Canis lupus familiaris GN=GMPR PE=3 SV=1	384.7	312.5	335.6	285.1	286.5	287	325.1
E2RMT9	Uncharacterized protein OS=Canis lupus familiaris GN=RBMS1 PE=4 SV=2	113.8	131	347.3	321.2	339.6	273.7	449.5
E2RMV6	Uncharacterized protein OS=Canis lupus familiaris GN=DDX58 PE=4 SV=2	498.7	284.3	324.6	294.2	337.9	340.7	335.9
E2RMX9	Aconitate hydratase OS=Canis lupus familiaris GN=ACO1 PE=3 SV=2	820.5	620.9	811.3	725.7	655.9	844.3	760.3
E2RMY0	Uncharacterized protein OS=Canis lupus familiaris GN=TMEM33 PE=4 SV=1	371.1	240.9	375.7	392.3	404.3	488.9	319
E2RMY7	Uncharacterized protein OS=Canis lupus familiaris GN=FAM21C PE=4 SV=2	222.2	160.1	138.1	145.2	143.1	192.4	109.8
E2RMZ3	Ferritin OS=Canis lupus familiaris PE=3 SV=2	243.6	177.7	393.4	393.8	350.2	259.1	361.9
E2RMZ6	Uncharacterized protein OS=Canis lupus familiaris GN=WASF3 PE=4 SV=1	331	375.6	227.9	269	274.7	267.8	328.3
E2RN00	Uncharacterized protein OS=Canis lupus familiaris GN=PSMD6 PE=4 SV=2	238.5	202.2	229.8	231.2	236.8	248	225.7
E2RN10	Beta-2-microglobulin OS=Canis lupus familiaris GN=B2M PE=1 SV=2	188.4	303.9	492.3	378.7	496.2	485.7	434.3
E2RN30	Uncharacterized protein OS=Canis lupus familiaris GN=NASP PE=4 SV=1	269.4	218.9	190.8	240	248	247	209.5
E2RN38	Uncharacterized protein OS=Canis lupus familiaris GN=CALU PE=4 SV=1	634.3	481.2	1009.2	1147.8	1141.5	1011.1	1154.9
E2RN45	Uncharacterized protein OS=Canis lupus familiaris GN=G3BP1 PE=4 SV=2	188.1	135.6	165.7	205.7	242.5	373.5	202.5
E2RN50	Uncharacterized protein OS=Canis lupus familiaris GN=STAM PE=4 SV=2	584.8	756.1	584.7	551.2	539.3	472.3	627.8
E2RN64	Uncharacterized protein OS=Canis lupus familiaris GN=KIF1A PE=3 SV=2	522.8	530	246.3	255.7	279.8	239.9	264.6
E2RNA7	Uncharacterized protein OS=Canis lupus familiaris GN=CHID1 PE=4 SV=2	218.6	181.1	145.1	188.8	166.4	172.3	209.6
E2RNB0	Histone H2A OS=Canis lupus familiaris GN=H2AFX PE=3 SV=1	367.9	582.1	816.5	651.9	646	586.4	674
E2RNB6	Uncharacterized protein OS=Canis lupus familiaris GN=CRYAB PE=3 SV=1	488	1335.8	355.5	355.2	352.4	986	394.4
E2RNC1	Uncharacterized protein OS=Canis lupus familiaris GN=DCTN5 PE=4 SV=1	787.4	593.7	498.9	450.5	436.3	371.4	483.2
E2RNC3	Uncharacterized protein OS=Canis lupus familiaris GN=DNM2 PE=3 SV=2	497.3	321.3	368.4	405	406.4	479.9	330.7
E2RNC4	Uncharacterized protein OS=Canis lupus familiaris GN=PEX19 PE=4 SV=1	133	99.8	93.5	145	101.6	73.2	69.6
E2RNC7	LIM and senescent cell antigen-like-containing domain protein OS=Canis lupus familiaris GN=LIMS2 PE=4 SV=2	209.8	184.8	146	186	220.7	141.1	202
E2RNE4	Uncharacterized protein OS=Canis lupus familiaris GN=FAM114A2 PE=4 SV=2	198.2	190.9	153.1	185.8	165.2	131.1	164.7
E2RNE6	Uncharacterized protein OS=Canis lupus familiaris GN=ERLIN1 PE=4 SV=1	208.8	245.3	315.8	292.6	302.8	249.7	308.6
E2RNG3	Uncharacterized protein OS=Canis lupus familiaris GN=CPN1 PE=4 SV=1	64.4	34.8	345.4	188.6	171.9	203.3	142.3
E2RNJ3	Uncharacterized protein OS=Canis lupus familiaris GN=LAMP2 PE=3 SV=1	302.2	269	390.9	470.2	411.4	541.1	456.7
E2RNJ4	Glyceraldehyde-3-phosphate dehydrogenase OS=Canis lupus familiaris PE=3 SV=2	856.7	89.6	104.4	94	153.7	105.6	95.1
E2RNJ6	Uncharacterized protein OS=Canis lupus familiaris PE=4 SV=2	221.3	154.8	208.2	267.1	270.2	227	196.2
E2RNL3	Uncharacterized protein OS=Canis lupus familiaris GN=PRDX4 PE=4 SV=1	240.7	185.9	340.9	313.6	326.4	357.2	334.6
E2RNL4	Uncharacterized protein OS=Canis lupus familiaris GN=KANK3 PE=4 SV=2	196.4	117.3	127.1	134.2	132.1	145.7	115.2
E2RNM1	Uncharacterized protein OS=Canis lupus familiaris GN=APOD PE=3 SV=1	1177.8	452.2	349.7	267.3	301	260.7	305.2
E2RNM4	Uncharacterized protein OS=Canis lupus familiaris GN=AGFG1 PE=4 SV=2	45.2	150.5	98.8	126.4	123.5	62.4	180.2
E2RNM5	Uncharacterized protein OS=Canis lupus familiaris GN=HNMT PE=4 SV=2	577.3	504	379.9	450.5	490.4	432.7	411.8
E2RNN5	DNA-directed RNA polymerase subunit beta OS=Canis lupus familiaris GN=POLR2B PE=3 SV=2	133.4	109.6	214	225.7	210.3	236.5	197.1
E2RNN6	Uncharacterized protein OS=Canis lupus familiaris GN=MYOM1 PE=4 SV=2	51.7	33.7	38.4	33.8	34.5	648.9	33.9
E2RNQ2	Tubulin alpha chain OS=Canis lupus familiaris GN=TUBA1C PE=3 SV=2	778.9	1480.4	363.4	395.6	391.8	361.9	398.1
E2RNQ8	Uncharacterized protein OS=Canis lupus familiaris GN=DARS PE=3 SV=1	551.9	563.8	532.4	552.6	529.4	549.9	473.1
E2RNR0	Uncharacterized protein OS=Canis lupus familiaris GN=OGN PE=4 SV=2	490	497.3	3005.1	1997.6	2102.2	726.9	3569.3
E2RNR9	Uncharacterized protein OS=Canis lupus familiaris GN=OMD PE=4 SV=2	337.5	324.7	719.3	622.4	635.8	330.1	773.5
E2RNT3	Uncharacterized protein OS=Canis lupus familiaris GN=DHX9 PE=4 SV=1	441.6	323.4	344.1	373	395.1	401	327.1
E2RNV3	Uncharacterized protein OS=Canis lupus familiaris GN=PITHD1 PE=4 SV=2	357.2	446.3	413.2	431.5	387.1	412.7	341.8
E2RNV4	Uncharacterized protein OS=Canis lupus familiaris GN=HEBP1 PE=4 SV=1	254.7	378.7	349.1	320.8	330	263.4	390.4
E2RNW4	Uncharacterized protein OS=Canis lupus familiaris GN=CCDC56 PE=4 SV=1	453.8	619.1	520.8	411.1	447.6	468.8	484.3
E2RNW5	Uncharacterized protein OS=Canis lupus familiaris GN=ERO1A PE=4 SV=1	222.6	165	280	284.5	295.8	447.2	320.6
E2RNX1	Uncharacterized protein OS=Canis lupus familiaris PE=4 SV=2	268.6	180.5	376.7	374.4	439.2	280.1	551.1
E2RNX7	Uncharacterized protein OS=Canis lupus familiaris GN=EFEMP2 PE=4 SV=1	99.2	79.1	432.7	380.9	360.4	150.5	464.6
E2RNY1	Uncharacterized protein OS=Canis lupus familiaris GN=HNRNPUL1 PE=4 SV=1	284.2	275.4	339	348.7	374.9	347.8	428.3
E2RNY6	Uncharacterized protein OS=Canis lupus familiaris GN=DIS3 PE=3 SV=1	191.6	118.7	139.8	152.1	172.4	156.3	172.5
E2RP04	Uncharacterized protein OS=Canis lupus familiaris GN=RPS6KA3 PE=4 SV=2	177.4	137	167.7	189.2	183.6	201.8	150.4
E2RP05	40S ribosomal protein S6 OS=Canis lupus familiaris GN=RPS6 PE=3 SV=1	495.7	416.9	476.6	402.3	485.5	403.7	560.1
E2RP20	Perilipin OS=Canis lupus familiaris GN=PLIN2 PE=3 SV=2	759.2	707	449	495.9	433.8	536.5	370.8
E2RP26	Uncharacterized protein OS=Canis lupus familiaris GN=FLNC PE=4 SV=1	3211.4	1886.1	1544.2	1501.2	1554.9	2470.6	1591.3
E2RP48	Uncharacterized protein OS=Canis lupus familiaris GN=TREML1 PE=4 SV=2	420.6	81.2	172	204.5	315.2	143.7	131.6
E2RP87	Uncharacterized protein OS=Canis lupus familiaris GN=LOC478984 PE=4 SV=1	57.2	50.8	127.8	211.9	173.1	356.2	213.9
E2RP90	Uncharacterized protein OS=Canis lupus familiaris GN=RAB43 PE=4 SV=1	440.3	305.9	281.3	333.8	345.3	450.1	295.2
E2RPA8	Tetraspanin OS=Canis lupus familiaris GN=CD151 PE=3 SV=2	318.4	262	422.2	403.3	407.6	423	556.4
E2RPB3	Importin subunit alpha OS=Canis lupus familiaris GN=KPNA4 PE=3 SV=2	381.9	267.8	288	335.2	327.9	366.5	293.9
E2RPB8	Uncharacterized protein OS=Canis lupus familiaris GN=CLEC3B PE=4 SV=2	395.2	388.6	1005.1	820.1	964.6	520.1	2009
E2RPC6	Proteasome subunit beta type OS=Canis lupus familiaris GN=PSMB7 PE=3 SV=2	739.2	554.7	377.4	411.7	407.4	339.7	407.3
E2RPC9	Uncharacterized protein OS=Canis lupus familiaris GN=TIMM8A PE=3 SV=1	262.8	645.2	246.1	208	272.4	226.3	372.4
E2RPE2	Peptidyl-prolyl cis-trans isomerase OS=Canis lupus familiaris GN=PPIL1 PE=3 SV=1	221.7	190.9	174.3	217.8	198.8	226.8	185.8
E2RPE3	Uncharacterized protein OS=Canis lupus familiaris GN=IST1 PE=4 SV=1	710.3	552	781.7	751.8	656.8	568.3	575.9
E2RPE8	Uncharacterized protein OS=Canis lupus familiaris GN=ATP5O PE=3 SV=2	428.4	1181.6	329.5	300.4	334.2	350.2	384.5
E2RPE9	Uncharacterized protein OS=Canis lupus familiaris GN=APMAP PE=4 SV=1	292.4	210.9	230.9	301.4	277.3	340.2	227.1
E2RPG3	Uncharacterized protein OS=Canis lupus familiaris GN=AP1G1 PE=4 SV=2	553	406.5	353.8	392.9	384.7	394.4	364.7
E2RPG9	Coatomer subunit gamma OS=Canis lupus familiaris GN=COPG1 PE=3 SV=2	535.1	520.2	540.5	557.7	571	552.7	554.6
E2RPI9	Clathrin light chain OS=Canis lupus familiaris GN=CLTA PE=3 SV=1	396.8	486.9	304.5	384.4	336.2	308.6	400.2
E2RPJ4	Uncharacterized protein OS=Canis lupus familiaris GN=GCLC PE=4 SV=2	546.2	558	260.7	294	293	265	257.9
E2RPJ7	Uncharacterized protein OS=Canis lupus familiaris GN=BICD2 PE=4 SV=1	72.8	77.9	134.4	136.4	144.1	140.2	132.7
E2RPL0	Uncharacterized protein OS=Canis lupus familiaris GN=TNFAIP2 PE=4 SV=2	65.9	38.1	50	40.6	57.8	72.7	45.6
E2RPM2	Synaptosomal-associated protein OS=Canis lupus familiaris GN=SNAP25 PE=3 SV=1	694.7	546.8	241.8	275.3	287.4	286.5	235.1
E2RPN5	Uncharacterized protein OS=Canis lupus familiaris GN=PSPH PE=4 SV=2	150.2	147.3	103.6	191.3	129.8	133.7	113.6
E2RPP2	Uncharacterized protein OS=Canis lupus familiaris GN=LOC102152062 PE=4 SV=2	294.4	284.5	343	380.7	376.8	411.3	325.3
E2RPP8	Uncharacterized protein OS=Canis lupus familiaris GN=ALDH3A2 PE=3 SV=2	343	363.1	337	325.7	332.4	275.6	332.3
E2RPQ0	Small nuclear ribonucleoprotein-associated protein OS=Canis lupus familiaris GN=SNRPN PE=3 SV=1	370.4	267.7	239.7	204.3	245.5	196.6	262.4
E2RPQ6	Uncharacterized protein OS=Canis lupus familiaris GN=DPT PE=4 SV=1	248.7	207.7	291.2	201.1	255.7	319.4	418.1
E2RPS0	Uncharacterized protein OS=Canis lupus familiaris GN=USP14 PE=3 SV=2	538.1	471.1	507.9	542	485.4	465.6	454.8
E2RPS3	Uncharacterized protein OS=Canis lupus familiaris GN=LLGL1 PE=4 SV=2	236.7	341.7	146.7	133.4	151.5	176.8	137.1
E2RPS7	Uncharacterized protein OS=Canis lupus familiaris GN=RAP1GDS1 PE=4 SV=2	190.4	147.6	50.4	51.8	59.6	53.4	60.9
E2RPW3	Uncharacterized protein OS=Canis lupus familiaris GN=PON1 PE=4 SV=2	461.5	322.7	1141.1	904.8	845.4	821	784
E2RPW4	Uncharacterized protein OS=Canis lupus familiaris PE=4 SV=2	248.1	171.6	145.4	148.2	194.7	151.3	186.2
E2RPY1	Uncharacterized protein OS=Canis lupus familiaris GN=NAP1L4 PE=3 SV=1	363.1	486.9	371.4	399.1	418.4	348.5	476.1
E2RPY9	Uncharacterized protein OS=Canis lupus familiaris GN=PSME3 PE=4 SV=2	321.9	250.5	379.9	400.3	414.7	346.1	412.3
E2RPZ5	Uncharacterized protein OS=Canis lupus familiaris PE=4 SV=2	101.2	71	124.3	119.5	113.5	115.3	87.9
E2RPZ9	Glycylpeptide N-tetradecanoyltransferase OS=Canis lupus familiaris GN=NMT1 PE=3 SV=1	152.2	105.9	180.1	180.9	170.2	163.1	139.3
E2RQ04	Uncharacterized protein OS=Canis lupus familiaris GN=PRRC1 PE=4 SV=2	514.2	584.5	715.3	716.6	677.9	615.9	818.3
E2RQ08	Dolichyl-diphosphooligosaccharide--protein glycosyltransferase subunit 1 OS=Canis lupus familiaris GN=RPN1 PE=1 SV=1	761	532.6	898.1	926.2	1006.9	1206.7	906.6
E2RQ14	Annexin OS=Canis lupus familiaris GN=ANXA5 PE=2 SV=2	2001.4	1326.1	1042.9	1230.8	1055.2	924.4	1225.7
E2RQ22	Uncharacterized protein OS=Canis lupus familiaris GN=COQ9 PE=4 SV=1	496.9	446.4	330.8	364.8	328.3	597	397.9
E2RQ25	Uncharacterized protein OS=Canis lupus familiaris GN=MME PE=4 SV=1	250.7	137.3	234.6	219.4	196.7	212.9	238.9
E2RQ44	Uncharacterized protein OS=Canis lupus familiaris GN=FYCO1 PE=4 SV=2	134	211.4	219.5	220	211.1	243	215.1
E2RQ71	Uncharacterized protein OS=Canis lupus familiaris GN=APOM PE=4 SV=2	109.1	103.7	109.3	110.5	100.4	84.5	77.7
E2RQ77	Uncharacterized protein OS=Canis lupus familiaris GN=CKMT2 PE=3 SV=1	138.2	94.7	183.5	199.8	188.4	549.7	191.7
E2RQ80	Uncharacterized protein OS=Canis lupus familiaris GN=SNRPD3 PE=4 SV=1	120.5	118	148.8	173.9	182.5	175.4	151.5
E2RQ99	Uncharacterized protein OS=Canis lupus familiaris GN=ALDH7A1 PE=3 SV=1	997.9	917.9	458.8	503.3	480.1	474.8	603.3
E2RQB8	Uncharacterized protein OS=Canis lupus familiaris GN=VAT1L PE=4 SV=1	508	463.1	72.3	80.1	80.8	58.4	124.3
E2RQC6	Peptidylprolyl isomerase OS=Canis lupus familiaris GN=LOC607841 PE=4 SV=1	715	1011.9	471.7	440.9	471.2	506	550
E2RQC7	Lipase maturation factor OS=Canis lupus familiaris GN=LMF2 PE=3 SV=2	210.1	153.6	243.4	273.7	278.9	344	246.6
E2RQC9	RuvB-like helicase OS=Canis lupus familiaris GN=RUVBL1 PE=3 SV=2	336.3	306.6	332.8	330.7	372.7	314.1	333.7
E2RQE7	Uncharacterized protein OS=Canis lupus familiaris GN=NAPA PE=4 SV=1	655.8	568.9	306.6	326.9	339.8	331.1	297
E2RQF8	Uncharacterized protein OS=Canis lupus familiaris PE=4 SV=2	407.2	397.6	666.8	576.5	595.8	506	563
E2RQG8	Uncharacterized protein OS=Canis lupus familiaris GN=EIF4H PE=4 SV=2	119.2	259.1	150.5	219.6	173.4	211.2	171.2
E2RQH8	Uncharacterized protein OS=Canis lupus familiaris GN=SH3GLB2 PE=4 SV=1	535	761.1	391.9	375.4	420.6	433.8	424.4
E2RQJ8	Uncharacterized protein OS=Canis lupus familiaris GN=SLC30A7 PE=4 SV=2	313.7	166.9	155.2	218.4	176.1	258.1	170.1
E2RQK0	Uncharacterized protein OS=Canis lupus familiaris GN=GAN PE=4 SV=2	285.1	262	195.8	147.6	183.9	184.4	238
E2RQK2	Uncharacterized protein OS=Canis lupus familiaris GN=PBXIP1 PE=4 SV=2	80.6	147.8	46.5	25.3	37.1	42.5	51.5
E2RQL8	Uncharacterized protein OS=Canis lupus familiaris GN=DPH5 PE=3 SV=1	341.3	312	151	162.1	148.9	199.1	166.9
E2RQP1	Uncharacterized protein OS=Canis lupus familiaris GN=NTMT1 PE=4 SV=1	124.8	64.6	55.7	79.5	45.5	66.9	46.3
E2RQP6	Eukaryotic translation initiation factor 3 subunit C OS=Canis lupus familiaris GN=EIF3C PE=3 SV=1	802.5	636.2	707.1	758.4	768.8	854.4	793.6
E2RQP7	Uncharacterized protein OS=Canis lupus familiaris GN=RPA2 PE=4 SV=2	72.3	47.1	58.1	61.4	73.5	63.8	60.3
E2RQR4	Uncharacterized protein OS=Canis lupus familiaris GN=LANCL1 PE=4 SV=1	890.3	807.9	476.4	515.7	490.5	512	519.2
E2RQR5	Uncharacterized protein OS=Canis lupus familiaris GN=TYSND1 PE=3 SV=1	528.2	523.7	488.8	562.2	581.3	545.3	674.2
E2RQS9	Acetyltransferase component of pyruvate dehydrogenase complex OS=Canis lupus familiaris GN=DLAT PE=3 SV=1	314	267.1	148.8	116	153.5	157	129.2
E2RQV6	Uncharacterized protein OS=Canis lupus familiaris GN=SRRT PE=4 SV=1	292.9	336.7	269.7	341.8	326.9	300.8	352.8
E2RQV7	Uncharacterized protein OS=Canis lupus familiaris GN=NOP58 PE=4 SV=2	213.6	213.9	358.9	295.9	367.2	310.6	338.1
E2RQW2	Uncharacterized protein OS=Canis lupus familiaris GN=CHORDC1 PE=4 SV=2	580.5	538.3	598.2	518.6	547.6	483.3	537.7
E2RQY6	Calcium-transporting ATPase OS=Canis lupus familiaris GN=ATP2A3 PE=3 SV=1	289	156.4	187.8	189.4	204.4	192.9	134.8
E2RR01	Uncharacterized protein OS=Canis lupus familiaris GN=DDX6 PE=3 SV=1	658.8	745.6	741	799.1	803.5	766	815.7
E2RR10	Small ubiquitin-related modifier OS=Canis lupus familiaris GN=SUMO1 PE=3 SV=1	215	195.8	179.7	181.9	192.2	383.2	195.9
E2RR16	Uncharacterized protein OS=Canis lupus familiaris GN=UGGT1 PE=4 SV=2	289.3	269.9	410	395.2	419.6	440.9	452.1
E2RR17	Uncharacterized protein OS=Canis lupus familiaris GN=THNSL1 PE=3 SV=2	372.3	316.5	281.3	330.8	342.9	289.8	331.6
E2RR27	Cytochrome b-c1 complex subunit 6 OS=Canis lupus familiaris GN=UQCRH PE=3 SV=1	338.4	391	361.7	321.4	342.2	398.4	318.8
E2RR30	Uncharacterized protein OS=Canis lupus familiaris GN=FAAH PE=4 SV=2	459	370.1	267.4	280.4	290.8	266.3	219.4
E2RR33	Uncharacterized protein OS=Canis lupus familiaris GN=SF3B3 PE=4 SV=2	479.7	403.4	440.4	458.8	508.9	474.7	521
E2RR40	Uncharacterized protein OS=Canis lupus familiaris PE=4 SV=2	302.3	260.9	266.9	275.1	265.8	280.8	261
E2RR42	Uncharacterized protein OS=Canis lupus familiaris GN=FUK PE=4 SV=1	289.7	201.3	255.4	314.4	200	207.1	194.6
E2RR46	Uncharacterized protein OS=Canis lupus familiaris GN=NPEPL1 PE=4 SV=1	237	241.4	200.3	203.1	235.6	226.4	232.4
E2RR50	Uncharacterized protein OS=Canis lupus familiaris GN=DDX19A PE=4 SV=1	373.9	409.2	274.6	294	307.6	378.9	270.2
E2RR58	60S ribosomal protein L12 OS=Canis lupus familiaris GN=RPL12 PE=1 SV=1	523	569.6	669.2	677.8	727.8	751.5	830.3
E2RR68	Uncharacterized protein OS=Canis lupus familiaris GN=FAM129B PE=4 SV=1	623	456.7	950.9	626	601.8	462.6	653.5
E2RR74	Uncharacterized protein OS=Canis lupus familiaris GN=CAMK2D PE=4 SV=2	493	471.5	381.4	334.4	432.9	323.1	425.1
E2RR96	Uncharacterized protein OS=Canis lupus familiaris GN=WASF2 PE=4 SV=1	95.9	174.2	212.1	206.8	209.9	159.7	210.3
E2RRA1	Uncharacterized protein OS=Canis lupus familiaris GN=PRKAR2B PE=4 SV=1	288.8	317	305.8	347.9	344.2	330.4	328.5
E2RRB7	Uncharacterized protein OS=Canis lupus familiaris GN=VAPB PE=4 SV=1	525	775.9	447.3	424.3	443.7	401.2	473.8
E2RRC6	Uncharacterized protein OS=Canis lupus familiaris GN=RDX PE=4 SV=2	1091.9	996.1	595.4	672.3	660.1	577.9	766.9
E2RRC9	Phosphoglycerate kinase OS=Canis lupus familiaris GN=PGK1 PE=3 SV=1	2073	2071.2	972.8	1026.1	962.9	1037.3	999.4
E2RRD1	Uncharacterized protein OS=Canis lupus familiaris GN=PRKAR2A PE=4 SV=2	451.1	384.7	296.1	349.9	340.6	364.6	360.8
E2RRD2	Uncharacterized protein OS=Canis lupus familiaris PE=3 SV=2	956.2	989.3	1498.5	1291.4	1728.7	1279.7	1902
E2RRD4	Uncharacterized protein OS=Canis lupus familiaris GN=PRDX3 PE=4 SV=1	189.8	323.4	156.7	176	186.8	227.8	200.2
E2RRJ6	AP complex subunit beta OS=Canis lupus familiaris GN=AP1B1 PE=3 SV=2	875.7	765.5	866.9	856.4	895.8	733.9	813.8
E2RRM6	Uncharacterized protein OS=Canis lupus familiaris GN=HSPA4L PE=3 SV=2	1076	889.6	353.8	362.6	380.7	394.1	317.3
E2RRM7	Uncharacterized protein OS=Canis lupus familiaris GN=SNU13 PE=4 SV=2	146.8	155.3	280.7	266.9	294	236.9	333.7
E2RRN2	Uncharacterized protein OS=Canis lupus familiaris GN=FAM91A1 PE=4 SV=2	125.9	115.8	258.6	273.7	253.3	203.3	276.1
E2RRP1	Uncharacterized protein OS=Canis lupus familiaris GN=IVD PE=3 SV=1	578.9	646.7	570.3	580.3	561.9	576.5	639.9
E2RRP9	Branched-chain-amino-acid aminotransferase OS=Canis lupus familiaris GN=BCAT2 PE=3 SV=2	377.3	388.7	538.8	659.9	656.4	700.3	696
E2RRQ3	Uncharacterized protein OS=Canis lupus familiaris GN=SAR1B PE=3 SV=1	65.1	90.3	41	44.7	56.9	95.3	56.1
E2RRQ7	Uncharacterized protein OS=Canis lupus familiaris GN=DDX3X PE=3 SV=2	519.4	410.6	537.1	524.3	590.2	615.8	523.9
E2RRR2	Uncharacterized protein OS=Canis lupus familiaris GN=HSD17B14 PE=4 SV=1	232.1	363.1	132.5	157.8	139.4	137.6	123.9
E2RRR8	Uncharacterized protein OS=Canis lupus familiaris GN=ARVCF PE=4 SV=2	151.1	143	115.8	173.3	175	144.9	132.9
E2RRT4	Uncharacterized protein OS=Canis lupus familiaris GN=SF1 PE=4 SV=2	80.6	55.2	128.9	125.8	153.5	115.1	115.2
E2RRV8	Uncharacterized protein OS=Canis lupus familiaris GN=FABP7 PE=3 SV=1	1213.7	2276.6	446	405	394.9	376.7	418.8
E2RRW0	Uncharacterized protein OS=Canis lupus familiaris GN=SKP1 PE=3 SV=1	906.6	974.4	292.7	338.3	307.4	316.3	334.4
E2RRX8	Uncharacterized protein OS=Canis lupus familiaris GN=PRRT2 PE=4 SV=2	237.4	365.4	116.4	123.4	137.6	131.9	120.6
E2RRY7	Uncharacterized protein OS=Canis lupus familiaris GN=UMPS PE=3 SV=1	102.5	110.4	80.6	75	87	94	75.5
E2RRZ8	Uncharacterized protein OS=Canis lupus familiaris GN=RPRD1B PE=4 SV=1	130.1	96.6	152.7	155	161.1	160	149.1
E2RS09	Uncharacterized protein OS=Canis lupus familiaris GN=GFAP PE=3 SV=1	8180.9	19502.8	4381	3214.5	4411.6	3050.5	7059.1
E2RS32	Uncharacterized protein OS=Canis lupus familiaris GN=LTBP2 PE=4 SV=2	177.7	112.6	226	412.9	352.9	436.8	308.7
E2RS43	Uncharacterized protein OS=Canis lupus familiaris GN=RBM14 PE=4 SV=1	35.9	44.9	123.3	95.2	104.8	73.3	95.4
E2RS46	Uncharacterized protein OS=Canis lupus familiaris GN=FBN2 PE=4 SV=2	790.7	603.5	2628.4	1817.9	2133.8	946.7	2171.5
E2RS47	Uncharacterized protein OS=Canis lupus familiaris GN=PHYHIPL PE=4 SV=1	1244.6	993.8	538.8	623.6	601	572.9	466.8
E2RS52	Uncharacterized protein OS=Canis lupus familiaris GN=KIAA1217 PE=4 SV=2	331	268.9	355.7	364.8	378.1	369.4	379.2
E2RS63	Uncharacterized protein OS=Canis lupus familiaris GN=FAH PE=4 SV=2	561.8	364.3	331.3	274.5	266.6	287.6	330.3
E2RS64	Uncharacterized protein OS=Canis lupus familiaris GN=ANGEL2 PE=4 SV=2	162.2	153.6	189.1	248.6	215.4	270.6	272.9
E2RS70	Uncharacterized protein OS=Canis lupus familiaris GN=RBM4 PE=4 SV=1	72.8	60.3	99.9	104.6	107.9	93.9	93.4
E2RS79	Uncharacterized protein OS=Canis lupus familiaris GN=CFB PE=3 SV=2	327.2	211.4	560.9	518.4	569.5	573.9	681
E2RS80	Uncharacterized protein OS=Canis lupus familiaris GN=CFB PE=3 SV=2	970.1	1202.5	2198.7	1811.4	1794.2	1531.1	2198.4
E2RSB5	Uncharacterized protein OS=Canis lupus familiaris GN=OXR1 PE=4 SV=2	535.3	548	249.8	278.1	287	228.1	385.7
E2RSC2	Uncharacterized protein OS=Canis lupus familiaris GN=AHSP PE=4 SV=1	113.1	36	324.2	462.1	376.3	165.3	173.1
E2RSC3	Uncharacterized protein OS=Canis lupus familiaris GN=C16orf58 PE=4 SV=2	115.1	122.6	109.3	122.6	118	123.9	96.9
E2RSC5	Uncharacterized protein OS=Canis lupus familiaris GN=TLN2 PE=4 SV=2	259.1	218.9	236.3	238.6	259.5	202.4	286.9
E2RSD6	Uncharacterized protein OS=Canis lupus familiaris GN=SKIV2L PE=4 SV=1	26.4	26.1	18.4	19.8	24	24.3	20
E2RSE8	Uncharacterized protein OS=Canis lupus familiaris GN=VPS11 PE=4 SV=1	179.6	195.3	153.5	209.8	196.3	256	159.1
E2RSF2	Superoxide dismutase OS=Canis lupus familiaris GN=SOD2 PE=3 SV=1	220.2	466.6	245.9	289.2	229.5	342.5	187.3
E2RSF6	Uncharacterized protein OS=Canis lupus familiaris GN=ARF1 PE=3 SV=1	527.5	474.7	390.4	419.3	399.5	390.4	470.2
E2RSF7	Phosphoinositide phospholipase C OS=Canis lupus familiaris GN=PLCD3 PE=4 SV=2	71	68.4	85.1	88.3	89.4	89.7	85.6
E2RSG2	Uncharacterized protein OS=Canis lupus familiaris GN=NECAP1 PE=4 SV=1	1014.2	1126.1	426.2	460.2	460.1	397.4	396.4
E2RSG8	Uncharacterized protein OS=Canis lupus familiaris GN=SEC24D PE=4 SV=2	251	213.4	445.1	522	465	506.4	462.2
E2RSH4	Uncharacterized protein OS=Canis lupus familiaris GN=SUSD2 PE=4 SV=2	176.9	162	144.1	139.5	131	101.6	135.7
E2RSI4	Spectrin beta chain OS=Canis lupus familiaris GN=SPTBN2 PE=3 SV=1	170.4	112.2	275.9	488.4	249.3	380.6	153.6
E2RSI5	Uncharacterized protein OS=Canis lupus familiaris GN=UQCRC1 PE=4 SV=2	323.8	443.1	224.9	242.9	246.7	302.7	254.1
E2RSI6	Uncharacterized protein OS=Canis lupus familiaris GN=EZR PE=4 SV=1	920.2	783.6	716.8	712.1	747.6	649.6	838.3
E2RSI7	Uncharacterized protein OS=Canis lupus familiaris GN=UBE2F PE=3 SV=1	102	327.5	181	161.7	160.2	116.6	194.5
E2RSJ0	Uncharacterized protein OS=Canis lupus familiaris GN=AP2S1 PE=4 SV=1	276.8	498.8	408.5	369.5	363.9	379.1	390.2
E2RSJ3	Uncharacterized protein OS=Canis lupus familiaris GN=LPP PE=4 SV=2	174.3	101.4	173	195.4	282.4	195.9	180.8
E2RSJ4	Uncharacterized protein OS=Canis lupus familiaris GN=CTAGE5 PE=4 SV=1	164.6	130.3	166.4	152.3	179.5	169.6	142
E2RSK6	V-type proton ATPase subunit C OS=Canis lupus familiaris GN=ATP6V1C1 PE=3 SV=2	1536.3	1297	668.9	782.2	739.7	862.2	740.4
E2RSL5	Uncharacterized protein OS=Canis lupus familiaris GN=SAE1 PE=4 SV=2	524.2	438.9	535	706.8	625.1	672.7	598
E2RSP4	Lysine--tRNA ligase OS=Canis lupus familiaris GN=KARS PE=3 SV=1	438.9	316.1	432.5	470	449.5	508.5	472.1
E2RSQ9	Dihydropyrimidine dehydrogenase [NADP(+)] OS=Canis lupus familiaris GN=DPYD PE=3 SV=2	276.7	315.9	203.3	341.4	307.4	350.8	250.6
E2RSR4	Uncharacterized protein OS=Canis lupus familiaris GN=PBDC1 PE=4 SV=2	200.7	183	139.4	170.3	162.7	201.5	161.2
E2RSR5	Eukaryotic translation initiation factor 3 subunit A OS=Canis lupus familiaris GN=EIF3A PE=3 SV=2	387.5	382.5	398.2	391.3	416.4	406.5	390.5
E2RST4	Single-stranded DNA-binding protein OS=Canis lupus familiaris GN=SSBP1 PE=3 SV=1	159.1	177.6	143.7	115.2	142.9	119.4	144.5
E2RSU3	Elongation factor Tu OS=Canis lupus familiaris GN=TUFM PE=3 SV=1	633.5	708.7	444	429.6	495.3	508.2	527.4
E2RSU6	Uncharacterized protein OS=Canis lupus familiaris GN=ENSA PE=3 SV=1	288.4	1462.1	203	215.9	217.6	223.4	246.6
E2RSU7	Uncharacterized protein OS=Canis lupus familiaris GN=AHSA1 PE=4 SV=1	146.2	128	70.1	78.7	76.9	93	65.4
E2RSV2	Uncharacterized protein OS=Canis lupus familiaris GN=RAE1 PE=4 SV=1	316.9	344.4	1906.3	1006.9	1149.3	699.5	1392
E2RSV7	Nuclear pore complex protein Nup93 OS=Canis lupus familiaris GN=NUP93 PE=3 SV=2	297.4	249.8	342.2	396.6	413.4	396.5	323.6
E2RSV9	Uncharacterized protein OS=Canis lupus familiaris GN=NUCB1 PE=4 SV=1	468.9	370.1	528.9	633	581.3	629.7	630.6
E2RSW0	Uncharacterized protein OS=Canis lupus familiaris GN=CKAP5 PE=4 SV=2	725.3	550.9	345.2	403.5	395.4	443.4	323.4
E2RSW1	Uncharacterized protein OS=Canis lupus familiaris GN=BHMT PE=4 SV=1	2022.6	1743.2	629.5	653.6	612.6	633.9	577.3
E2RSX0	Arsenical pump-driving ATPase OS=Canis lupus familiaris PE=3 SV=2	263.4	220.7	295.4	290.8	254.9	258.6	247.7
E2RT07	Uncharacterized protein OS=Canis lupus familiaris GN=NDUFA6 PE=3 SV=2	530.8	735.3	297.4	272.8	289.8	341.5	327.6
E2RT18	Oxysterol-binding protein OS=Canis lupus familiaris GN=OSBPL9 PE=3 SV=1	246.1	159.4	278.1	356	347.1	400.3	272.2
E2RT20	Glycogen [starch] synthase OS=Canis lupus familiaris GN=GYS1 PE=3 SV=2	368.6	407.2	462.9	465.1	430.1	569.3	413.7
E2RT24	Uncharacterized protein OS=Canis lupus familiaris GN=GSTZ1 PE=3 SV=1	526.8	503.8	383.8	362.6	369	318.7	457.4
E2RT47	Uncharacterized protein OS=Canis lupus familiaris GN=MAT2B PE=4 SV=1	111.5	117	188.7	115.4	143.3	129.1	145.1
E2RT55	Uncharacterized protein OS=Canis lupus familiaris GN=COPS4 PE=4 SV=1	404.5	297.1	189.8	211.5	200.6	219.7	199.8
E2RT60	Integrin beta OS=Canis lupus familiaris GN=ITGB1 PE=3 SV=2	614.4	505.2	1064.3	1174.8	1082.7	861.4	1325.1
E2RT63	Heat shock 70 kDa protein 4 OS=Canis lupus familiaris GN=HSPA4 PE=3 SV=2	1568.5	1346.6	848.6	857.9	868.4	932.2	912.6
E2RT65	Phosphoglycerate mutase OS=Canis lupus familiaris GN=PGAM1 PE=3 SV=2	2692.1	2721.2	953.5	946.6	1002.2	939.5	1130.5
E2RT71	Uncharacterized protein OS=Canis lupus familiaris GN=NRDC PE=4 SV=2	92.8	59.8	110.9	100.5	103.9	98	109.1
E2RT83	Uncharacterized protein OS=Canis lupus familiaris GN=TPCN1 PE=4 SV=2	64.1	87.2	110.2	120.9	141.7	90.8	131.6
E2RT85	Uncharacterized protein OS=Canis lupus familiaris GN=COL14A1 PE=4 SV=2	1936.4	1713.9	5536.9	5416.8	5075.1	2488.6	4759
E2RT94	Uncharacterized protein OS=Canis lupus familiaris GN=GOPC PE=4 SV=1	503.4	244.8	192.8	207.8	208.6	229.4	147
E2RTA2	Uncharacterized protein OS=Canis lupus familiaris PE=4 SV=2	271.3	303.4	212.1	174.6	220.7	143.5	209.2
E2RTB1	Uncharacterized protein OS=Canis lupus familiaris GN=NPM1 PE=4 SV=2	252	272.5	417.2	433.5	461.5	436.2	473.3
E2RTB5	Uncharacterized protein OS=Canis lupus familiaris GN=UQCRQ PE=4 SV=1	842.4	664.5	461.8	512.6	470.3	714	450
E2RTC3	RuvB-like helicase OS=Canis lupus familiaris GN=RUVBL2 PE=3 SV=2	437.4	304.4	402.5	395.2	433.5	373.3	429.2
E2RTD2	Uncharacterized protein OS=Canis lupus familiaris GN=SLC33A1 PE=4 SV=2	214.1	153.2	227.9	293.6	260	273.3	305.5
E2RTD6	Uncharacterized protein OS=Canis lupus familiaris GN=HMBS PE=3 SV=1	137.3	118.4	185.3	210.2	173.4	144.2	176.6
E2RTE0	Uncharacterized protein OS=Canis lupus familiaris GN=TGFB1I1 PE=4 SV=2	213.5	84.8	140.6	159.1	174.7	118.1	141.3
E2RTF6	Vacuolar-sorting protein SNF8 OS=Canis lupus familiaris GN=SNF8 PE=3 SV=1	200.9	150.6	116.6	130.1	146.8	302.1	122.9
E2RTG1	Uncharacterized protein OS=Canis lupus familiaris GN=UBE2Z PE=3 SV=2	311.4	320.7	264.6	286.3	286.1	321	282
E2RTG3	Uncharacterized protein OS=Canis lupus familiaris GN=ITGAX PE=3 SV=2	726.4	890.9	1090.5	829.5	996.7	793.2	1081.3
E2RTG5	Uncharacterized protein OS=Canis lupus familiaris GN=ITGAM PE=3 SV=2	460.7	347	477.1	551	481.1	610.2	469.8
E2RTI3	Uncharacterized protein OS=Canis lupus familiaris GN=UBQLN2 PE=4 SV=1	317.2	544.9	290.9	282.4	303.1	261.3	343.5
E2RTJ0	Anamorsin OS=Canis lupus familiaris GN=CIAPIN1 PE=3 SV=2	153	238.8	183.8	190.1	183.6	166.2	192.9
E2RTJ5	Uncharacterized protein OS=Canis lupus familiaris GN=MFAP5 PE=4 SV=2	201.7	160.7	1041.8	784.5	805.7	390.8	684.1
E2RTJ7	Uncharacterized protein OS=Canis lupus familiaris GN=VARS PE=3 SV=2	493.3	308.1	428.2	464.7	437.7	417.8	435.5
E2RTK6	Uncharacterized protein OS=Canis lupus familiaris GN=CHMP1A PE=4 SV=1	134.3	560.3	213.8	245.1	227.1	181.7	280.9
E2RTL3	Uncharacterized protein OS=Canis lupus familiaris GN=LZTFL1 PE=4 SV=1	398.3	331.3	212.7	259.4	256.8	215.8	222.8
E2RTL4	Uncharacterized protein OS=Canis lupus familiaris GN=PLOD3 PE=4 SV=2	221	178.1	224.5	242.5	237.6	254.3	215.1
F1P603	Amyloid beta A4 protein OS=Canis lupus familiaris GN=APP PE=4 SV=2	250.2	219	111.1	131.7	127.2	146.8	129.5
F1P624	Uncharacterized protein OS=Canis lupus familiaris GN=CAND1 PE=4 SV=1	1165.2	870.7	862.4	905.4	862.3	800	871.9
F1P634	Uncharacterized protein OS=Canis lupus familiaris GN=MYL9 PE=4 SV=2	115.9	95.4	211.8	217.8	254.4	187.4	190.1
F1P659	Uncharacterized protein OS=Canis lupus familiaris GN=TBC1D9B PE=4 SV=2	143.2	112.1	162.1	179.9	200.8	173.3	165.9
F1P669	Uncharacterized protein OS=Canis lupus familiaris GN=SYN2 PE=4 SV=1	236.5	246.8	143.9	166	137.6	104.8	135.3
F1P679	Uncharacterized protein OS=Canis lupus familiaris GN=ACTR3 PE=3 SV=1	1030.7	884.7	966.5	1137	1067	1192.2	998
F1P6A4	Cytochrome c oxidase subunit 5A, mitochondrial OS=Canis lupus familiaris GN=COX5A PE=4 SV=2	142.8	514.5	283.4	252.6	258.8	275	249.5
F1P6B2	Mannose-6-phosphate isomerase OS=Canis lupus familiaris GN=MPI PE=3 SV=2	252.8	227.3	67.3	72.4	65	71.5	64
F1P6B7	Annexin OS=Canis lupus familiaris GN=ANXA1 PE=3 SV=1	1093.6	1145.7	1454.5	1662.3	1602.4	1665.3	1656.8
F1P6D7	Uncharacterized protein OS=Canis lupus familiaris GN=CD47 PE=4 SV=2	188.4	148	150.3	237.4	192.6	225.8	213.4
F1P6E1	Uncharacterized protein OS=Canis lupus familiaris GN=C1S PE=3 SV=2	601.7	362.7	669	622.8	563.3	490.3	677.8
F1P6G9	Pyruvate carboxylase OS=Canis lupus familiaris GN=PC PE=4 SV=2	963.9	927.7	538.8	560.2	535.2	599.3	558.5
F1P6H7	Fibronectin OS=Canis lupus familiaris GN=FN1 PE=4 SV=2	2393	2021.2	5835.5	4598.1	4720.2	3610.1	4875.5
F1P6K2	Uncharacterized protein OS=Canis lupus familiaris GN=NAMPT PE=4 SV=1	192.3	168.2	84.1	100.3	100.6	145.6	85.4
F1P6L7	N-acetylglucosamine-6-sulfatase OS=Canis lupus familiaris GN=GNS PE=3 SV=2	166.9	130.8	140.9	153.3	155.5	170.4	170.5
F1P6N4	Sortilin OS=Canis lupus familiaris GN=SORT1 PE=4 SV=2	444.4	291.8	127.4	153.5	145.6	139.2	148
F1P6P1	Uncharacterized protein OS=Canis lupus familiaris GN=ANK2 PE=4 SV=1	1489.5	998.1	462.5	492.7	553.8	506.3	516.9
F1P6P2	Transgelin OS=Canis lupus familiaris GN=TAGLN2 PE=3 SV=2	1109.8	1146.6	1860.2	1999.4	2185.9	1498.5	2348.4
F1P6P3	Uncharacterized protein OS=Canis lupus familiaris GN=BCAS1 PE=4 SV=2	1442.4	2472.4	370.9	385.4	369.4	355.2	412.6
F1P6Q0	Uncharacterized protein OS=Canis lupus familiaris GN=GNAI3 PE=4 SV=2	264.3	306.8	287.3	264.9	280.1	288.8	267
F1P6R3	Uncharacterized protein OS=Canis lupus familiaris GN=STK39 PE=4 SV=2	250.5	302.2	99.7	96.9	109.5	98.3	87
F1P6R6	AMP deaminase OS=Canis lupus familiaris GN=AMPD2 PE=3 SV=2	247.7	303.5	187.8	170.1	210.6	181	203.3
F1P6R7	Uncharacterized protein OS=Canis lupus familiaris GN=GSTM4 PE=3 SV=2	1138.8	1600.6	616.9	671.7	651.1	585.8	685.7
F1P6S5	Uncharacterized protein OS=Canis lupus familiaris GN=AMPH PE=4 SV=2	585.1	390.8	121.8	141.3	131.3	150.1	133.6
F1P6U6	Uncharacterized protein OS=Canis lupus familiaris GN=CDH11 PE=4 SV=2	345.1	339.6	436.7	543.6	512.8	366.7	464.9
F1P6V8	Uncharacterized protein OS=Canis lupus familiaris GN=DYNC1LI2 PE=4 SV=2	276.5	331	158.7	148	173.3	152.7	194.5
F1P6W6	Uncharacterized protein OS=Canis lupus familiaris GN=ACADM PE=3 SV=2	220.8	217.7	217.8	228	222.3	295.2	221.4
F1P6X0	Uncharacterized protein OS=Canis lupus familiaris GN=RABGGTB PE=4 SV=2	370.2	246.9	155	156.4	183.8	210.7	193.2
F1P6Y7	Uncharacterized protein OS=Canis lupus familiaris GN=TPPP3 PE=4 SV=2	721	2150.1	457.6	460.8	453.7	416.7	474.2
F1P707	Uncharacterized protein OS=Canis lupus familiaris GN=LOC484960 PE=4 SV=2	202.2	151	390.4	339.1	372.5	296.5	287
F1P712	Uncharacterized protein OS=Canis lupus familiaris GN=FBXO7 PE=4 SV=2	217.4	127.3	283.7	252.6	245.4	187.4	160.5
F1P714	Uncharacterized protein OS=Canis lupus familiaris GN=PPP2R5D PE=4 SV=2	272.4	247	176.3	217.6	201.1	195.2	199.5
F1P719	Uncharacterized protein OS=Canis lupus familiaris GN=EHD4 PE=3 SV=2	893.6	772.7	528.9	618.5	566.8	724	569.9
F1P732	Uncharacterized protein OS=Canis lupus familiaris GN=TOM1 PE=3 SV=2	213.9	217	201.3	228.8	227.2	238.8	233.5
F1P767	Sodium/potassium-transporting ATPase subunit alpha OS=Canis lupus familiaris GN=ATP1A3 PE=3 SV=2	4739.6	6587.2	1832.1	1772.4	1744.1	1778.6	1889.2
F1P778	Uncharacterized protein OS=Canis lupus familiaris GN=S100P PE=4 SV=2	179.5	228.4	345.8	473.7	389.9	466.4	302.4
F1P797	Uncharacterized protein OS=Canis lupus familiaris GN=ATIC PE=3 SV=2	343.9	262.5	310.5	336.1	353.9	309.4	359.3
F1P798	Uncharacterized protein OS=Canis lupus familiaris GN=TNR PE=4 SV=2	930.7	578.5	165.1	178.8	165.6	178.2	161.2
F1P7B0	Uncharacterized protein OS=Canis lupus familiaris GN=RPL5 PE=3 SV=2	605.7	727.4	409.9	368.3	455.7	315.1	632.9
F1P7C2	Uncharacterized protein OS=Canis lupus familiaris GN=AARS PE=3 SV=2	1195.6	961.6	530.9	583.8	623.7	622	575
F1P7D2	Uncharacterized protein OS=Canis lupus familiaris GN=STXBP1 PE=3 SV=2	1132.1	1221.4	468.9	513.1	473.9	463.5	587.9
F1P7D3	Uncharacterized protein OS=Canis lupus familiaris GN=GCLM PE=4 SV=1	225.1	180.7	204.3	203.3	203.3	187.3	165.9
F1P7F8	Uncharacterized protein OS=Canis lupus familiaris GN=ZYX PE=4 SV=2	199.1	295.2	403.3	354.6	357.6	274.6	409.1
F1P7I1	Adenosylhomocysteinase OS=Canis lupus familiaris GN=AHCYL1 PE=3 SV=1	3067.4	3280.1	1284.1	1253.7	1299.8	1238.8	1446.1
F1P7I7	Serine/threonine-protein phosphatase OS=Canis lupus familiaris GN=CDKL3 PE=3 SV=2	511.3	417.6	328.7	343.6	325	356.2	391.1
F1P7J0	Uncharacterized protein OS=Canis lupus familiaris GN=SFPQ PE=4 SV=2	583	508.8	811.3	816.1	888.7	788.1	959
F1P7J4	Uncharacterized protein OS=Canis lupus familiaris GN=C5 PE=4 SV=2	741.6	580.8	1761.4	1446.6	1373.5	1374.1	1450.2
F1P7M0	Aminopeptidase OS=Canis lupus familiaris GN=NPEPPS PE=3 SV=2	1111.4	973.5	446	457	460.5	454.8	453.5
F1P7P3	Uncharacterized protein OS=Canis lupus familiaris GN=CAPZA1 PE=3 SV=1	667.2	458.6	590.9	724.9	671.7	728.6	633.9
F1P7R1	NADPH--cytochrome P450 reductase OS=Canis lupus familiaris GN=POR PE=3 SV=2	450	417.2	372.6	429.7	389.3	514.1	397.5
F1P7S9	Serine/threonine-protein phosphatase OS=Canis lupus familiaris GN=PPP1CB PE=3 SV=2	668.6	528.1	438.7	483.9	472	502.1	487
F1P7U4	Uncharacterized protein OS=Canis lupus familiaris GN=WDR60 PE=4 SV=2	221.6	254.6	391.5	676.4	516	441.7	652.2
F1P7V6	Uncharacterized protein OS=Canis lupus familiaris GN=STIP1 PE=4 SV=2	1180.7	1753.9	941	877.4	920.6	839.7	1068
F1P7X4	Uncharacterized protein OS=Canis lupus familiaris GN=PTMS PE=4 SV=2	816.9	402.2	447.2	477.8	541.4	671	529.7
F1P7Y1	Uncharacterized protein OS=Canis lupus familiaris GN=TRIM47 PE=4 SV=2	252.7	176.1	382.1	398.5	426.3	402.9	333.7
F1P7Y6	Uncharacterized protein OS=Canis lupus familiaris PE=4 SV=2	486.5	322.6	609.4	566.7	738.5	525.2	619
F1P7Y7	Uncharacterized protein OS=Canis lupus familiaris GN=HTT PE=4 SV=2	45	28.4	72	83	69.2	76.9	38.9
F1P7Z9	Phosphoinositide phospholipase C OS=Canis lupus familiaris GN=PLCD1 PE=4 SV=2	507.9	583.9	392.4	374	374	293.2	389.9
F1P808	Uncharacterized protein OS=Canis lupus familiaris GN=SLC25A1 PE=3 SV=2	323.5	186.6	112.6	137.8	145.2	145	133.9
F1P815	RING finger protein unkempt homolog OS=Canis lupus familiaris GN=UNK PE=4 SV=2	155.2	156	206.3	249.8	239.9	221.4	230.2
F1P832	Alpha-1,4 glucan phosphorylase OS=Canis lupus familiaris GN=PYGM PE=3 SV=2	2362.7	2710.9	1002.6	986.9	1008.4	1190.1	1020.4
F1P835	Polypeptide N-acetylgalactosaminyltransferase OS=Canis lupus familiaris GN=GALNT2 PE=3 SV=2	457.8	275.7	500.7	435.2	500.5	429	491.9
F1P841	Uncharacterized protein OS=Canis lupus familiaris GN=GC PE=3 SV=2	1165	963.3	3575.1	2994.3	2508.2	2137.6	2589.8
F1P890	Uncharacterized protein OS=Canis lupus familiaris GN=NEDD8 PE=4 SV=2	179	255.1	101.6	115.8	146.3	144.4	106.4
F1P894	Uncharacterized protein OS=Canis lupus familiaris GN=MCAM PE=4 SV=2	450	447.5	365.1	379.7	372.1	429.8	437
F1P895	Uncharacterized protein OS=Canis lupus familiaris GN=EIF4A1 PE=3 SV=2	302.6	263.6	338.8	333.4	311.5	343.1	295.2
F1P897	Uncharacterized protein OS=Canis lupus familiaris GN=GPM6A PE=4 SV=2	341	524.8	160.6	156.6	170.1	139.9	165.8
F1P8B6	Uncharacterized protein OS=Canis lupus familiaris GN=NDRG4 PE=4 SV=1	1468.5	1524.1	494.2	472.3	449.3	433.3	512.3
F1P8D3	Uncharacterized protein OS=Canis lupus familiaris GN=HNRNPH3 PE=4 SV=2	438.8	290	440.8	447.6	437	346.9	544.5
F1P8D8	Uncharacterized protein OS=Canis lupus familiaris GN=ITGAL PE=3 SV=2	69.4	63.3	55.1	61.4	68.9	83.6	49.4
F1P8D9	Uncharacterized protein OS=Canis lupus familiaris GN=SMOC1 PE=4 SV=2	687.2	180.3	290.9	456.4	300.7	295.5	434.3
F1P8F4	Uncharacterized protein OS=Canis lupus familiaris GN=FABP9 PE=3 SV=2	282.7	931.7	268.6	283	303.6	183.2	411.9
F1P8F7	Uncharacterized protein OS=Canis lupus familiaris GN=SLC16A7 PE=4 SV=2	130.6	100.6	393.6	444.5	301.9	267.1	220.7
F1P8G0	Fibrinogen gamma chain OS=Canis lupus familiaris GN=FGG PE=4 SV=2	1139	1021.1	3328	1992.7	2353	2064.9	2665.5
F1P8G4	Uncharacterized protein OS=Canis lupus familiaris GN=FUCA2 PE=4 SV=1	354.2	211.6	289.9	420.1	338.4	453.8	379.2
F1P8H7	Uncharacterized protein OS=Canis lupus familiaris GN=LSG1 PE=4 SV=2	118.4	183.3	373.9	487.8	387.2	341.7	586.1
F1P8K0	Uncharacterized protein OS=Canis lupus familiaris GN=ESYT2 PE=4 SV=2	128	108.2	195.5	199.8	224.4	242.5	199.4
F1P8L7	Rab GDP dissociation inhibitor OS=Canis lupus familiaris GN=GDI2 PE=3 SV=1	1584.6	1382	1132.3	1222.5	1150.8	1071.3	1197.3
F1P8Q0	Uncharacterized protein OS=Canis lupus familiaris GN=ITGAV PE=3 SV=2	230.2	184.3	209.1	210.4	206.5	171	237.9
F1P8R2	Uncharacterized protein OS=Canis lupus familiaris GN=RSF1 PE=4 SV=2	272.4	139.2	252.6	282.8	252.7	250.2	266.9
F1P8R8	Transporter OS=Canis lupus familiaris GN=SLC6A5 PE=3 SV=2	97.7	190.8	66.2	77.1	83.9	76.4	75.5
F1P8U7	Uncharacterized protein OS=Canis lupus familiaris GN=HMOX1 PE=4 SV=2	112	83.4	97.6	119.3	95.5	130.9	83.3
F1P8V6	Myoglobin OS=Canis lupus familiaris GN=MB PE=3 SV=1	110.4	188.1	281.1	167	163.8	413.1	114
F1P8W3	Uncharacterized protein OS=Canis lupus familiaris GN=OSTF1 PE=4 SV=2	109.7	208.4	195.3	211.3	221.7	207.9	190.7
F1P8Z5	Uncharacterized protein OS=Canis lupus familiaris GN=APOB PE=4 SV=1	719.9	642.1	560.5	596.7	589.7	484.4	572
F1P8Z9	Uncharacterized protein OS=Canis lupus familiaris GN=COMT PE=4 SV=2	476.1	456.1	577.2	582	517.1	595.6	562
F1P909	Uncharacterized protein OS=Canis lupus familiaris GN=NDUFA13 PE=4 SV=1	168.1	206.7	111.9	162.9	152.6	247.9	98
F1P910	Uncharacterized protein OS=Canis lupus familiaris PE=3 SV=2	256.9	193.7	164.5	191.5	191.2	178	151.2
F1P911	Uncharacterized protein OS=Canis lupus familiaris GN=LACTB PE=4 SV=2	120.6	79.2	80.2	96.2	111.2	96.8	99.4
F1P912	Uncharacterized protein OS=Canis lupus familiaris GN=TPM1 PE=3 SV=1	1180.2	803.8	1845.8	2718.8	2033	2971	2388.7
F1P914	Uncharacterized protein OS=Canis lupus familiaris GN=MVP PE=4 SV=2	429.6	363.5	625	680.7	620	585.2	530.9
F1P926	Uncharacterized protein OS=Canis lupus familiaris GN=FDPS PE=3 SV=2	512.7	325.5	254.7	228.2	260	389.1	256
F1P946	Uncharacterized protein OS=Canis lupus familiaris GN=ASAP2 PE=4 SV=2	120.3	136.4	94.8	88.7	106.2	110.4	125.9
F1P969	Eukaryotic translation initiation factor 3 subunit B OS=Canis lupus familiaris GN=EIF3B PE=3 SV=2	387.6	279.4	284.5	340.7	379.3	433	292.1
F1P975	Uncharacterized protein OS=Canis lupus familiaris GN=CAPN2 PE=3 SV=2	377.2	286.3	182.7	228.2	257.8	221.5	224.3
F1P976	Glycerol-3-phosphate dehydrogenase [NAD(+)] OS=Canis lupus familiaris GN=GPD1 PE=3 SV=2	450.6	543.5	863.8	742.5	664.8	571.3	807.6
F1P982	Uncharacterized protein OS=Canis lupus familiaris GN=RBM12 PE=4 SV=1	123.6	116.9	164.5	187.6	170	168.5	144.9
F1P996	Uncharacterized protein OS=Canis lupus familiaris GN=GPS1 PE=4 SV=2	327	261	157.2	191.7	195.2	209.8	170.4
F1P9A3	Ferrochelatase OS=Canis lupus familiaris GN=FECH PE=3 SV=1	126.2	81	68	73.6	91.1	81	68.2
F1P9B2	Uncharacterized protein OS=Canis lupus familiaris GN=SWAP70 PE=4 SV=2	223.5	176.6	218.5	228.6	230	238	257.8
F1P9C4	Alpha-mannosidase OS=Canis lupus familiaris GN=MAN2A1 PE=3 SV=2	271	196.9	276	278.1	333.7	366.1	274
F1P9E5	Platelet-activating factor acetylhydrolase OS=Canis lupus familiaris GN=PLA2G7 PE=4 SV=1	219.5	143.5	270.6	278.5	269.4	496.2	202.9
F1P9G0	Uncharacterized protein OS=Canis lupus familiaris GN=DNAJB4 PE=4 SV=2	218.7	204.4	112.8	132.8	141	180.3	151.8
F1P9G4	Uncharacterized protein OS=Canis lupus familiaris GN=DEK PE=4 SV=2	124.1	135.3	255.4	213.5	223.3	270.4	282.4
F1P9H3	Uncharacterized protein OS=Canis lupus familiaris GN=ENPP4 PE=4 SV=2	617.5	436.9	231.6	251.8	255.3	262.7	269.4
F1P9H9	Uncharacterized protein OS=Canis lupus familiaris GN=NUCKS1 PE=4 SV=2	172.7	180.3	223	163.3	219.9	150.2	283.7
F1P9I9	Carboxypeptidase OS=Canis lupus familiaris GN=CTSA PE=3 SV=1	80.2	58	66.2	77.1	82.8	105.1	63.3
F1P9J3	Myosin-9 OS=Canis lupus familiaris GN=MYH9 PE=3 SV=2	5378.2	3846.4	8984.8	9396.4	9773.4	8699.8	7979.6
F1P9J8	Uncharacterized protein OS=Canis lupus familiaris GN=HTATIP2 PE=4 SV=2	490.1	428.6	210.3	223.1	223.2	190.3	195
F1P9J9	Sideroflexin OS=Canis lupus familiaris GN=SFXN3 PE=3 SV=2	142.4	144.4	214.8	215.1	229.5	205	207.9
F1P9K6	Uncharacterized protein OS=Canis lupus familiaris GN=JAM3 PE=4 SV=2	113.5	104.6	35	33.9	44.4	28.9	47.6
F1P9M6	Uncharacterized protein OS=Canis lupus familiaris PE=4 SV=2	283.1	74.5	204.6	157.4	147.2	109.8	351
F1P9N2	Uncharacterized protein OS=Canis lupus familiaris GN=PLBD1 PE=4 SV=2	234.7	222.1	474.3	562	483.6	638.6	348.6
F1P9N9	Uncharacterized protein OS=Canis lupus familiaris GN=JMJD1C PE=4 SV=2	21.3	18.7	37.3	28.5	37.3	40.4	36.7
F1P9P5	Ubiquitinyl hydrolase 1 OS=Canis lupus familiaris GN=USP5 PE=3 SV=2	601.6	466.7	304.2	336.1	316.2	312	317.3
F1P9P7	Uncharacterized protein OS=Canis lupus familiaris GN=SDF4 PE=4 SV=2	224	146.1	178.2	204.3	229.6	182.8	226.8
F1P9S5	Uncharacterized protein OS=Canis lupus familiaris GN=PLXNB2 PE=4 SV=2	270.3	228	350.1	362.4	344.7	340.1	348.6
F1P9U2	Uncharacterized protein OS=Canis lupus familiaris GN=GMPS PE=4 SV=2	502.7	414.5	275.5	324.6	409.9	339.9	338.3
F1P9U4	Uncharacterized protein OS=Canis lupus familiaris GN=DPYSL2 PE=4 SV=2	3818.1	4162.5	1254.1	1243.1	1281.1	1249.1	1384.6
F1P9U9	Uncharacterized protein OS=Canis lupus familiaris GN=CTHRC1 PE=4 SV=2	427.1	300.6	729	813.2	754.1	765.9	865.6
F1P9W2	Calponin OS=Canis lupus familiaris GN=CNN3 PE=3 SV=1	270	784.5	572.7	589.1	561.4	423.4	682.4
F1P9W5	Uncharacterized protein OS=Canis lupus familiaris GN=SLC12A2 PE=4 SV=2	241.9	292.2	71	98.3	80.2	60.1	100.1
F1P9Y3	Uncharacterized protein OS=Canis lupus familiaris GN=NDUFS3 PE=3 SV=1	609.3	581.3	656.7	624	670.5	647.4	659.3
F1P9Y5	Uncharacterized protein OS=Canis lupus familiaris GN=TPD52 PE=4 SV=2	636.2	877.8	594.3	642.5	628.3	571.2	575.7
F1P9Z4	Uncharacterized protein OS=Canis lupus familiaris GN=RRAS2 PE=4 SV=2	369.8	438.1	159.7	175.8	199.1	171.6	184
F1PA10	Uncharacterized protein OS=Canis lupus familiaris GN=PIP4K2C PE=4 SV=2	310.8	319.7	85.8	153.8	152.5	96.9	163.5
F1PA11	Uncharacterized protein OS=Canis lupus familiaris GN=MAP7 PE=4 SV=2	235.2	160.5	115.6	106	107.2	95.7	100.7
F1PA19	Uncharacterized protein OS=Canis lupus familiaris GN=HNRNPAB PE=4 SV=2	139.2	88	70.7	82.4	85	92	108.7
F1PA22	Profilin OS=Canis lupus familiaris PE=3 SV=2	367.1	451.2	150.9	161.9	181	179.9	189.7
F1PA36	Uncharacterized protein OS=Canis lupus familiaris GN=H6PD PE=4 SV=2	100.1	76.9	93.5	108.7	102.3	122.2	94.2
F1PA70	Uncharacterized protein OS=Canis lupus familiaris GN=SGCB PE=4 SV=1	60.1	32.3	103.6	111.9	120.9	108.4	85.4
F1PA81	Uncharacterized protein OS=Canis lupus familiaris GN=RANBP2 PE=4 SV=2	251.9	189.3	326.6	334.6	338.6	323.1	313.4
F1PAB0	Uncharacterized protein OS=Canis lupus familiaris PE=4 SV=2	330.6	203.5	806.2	539.6	463.3	461.3	512
F1PAB7	Uncharacterized protein OS=Canis lupus familiaris GN=ALDH9A1 PE=3 SV=2	1090.4	1004.9	568.4	638.1	668.4	601.8	649.4
F1PAC1	Uncharacterized protein OS=Canis lupus familiaris GN=ACAP2 PE=4 SV=2	102	62.8	86.6	84.6	109.3	106.5	93.4
F1PAD2	Uncharacterized protein OS=Canis lupus familiaris GN=OLFML2B PE=4 SV=2	100.8	34.4	309	316.9	284.9	300.2	391.9
F1PAF0	Tissue alpha-L-fucosidase OS=Canis lupus familiaris GN=FUCA1 PE=4 SV=2	246.1	201.5	405.5	333.8	378	268.3	302.3
F1PAF3	Hepatocyte growth factor activator OS=Canis lupus familiaris GN=HGFAC PE=3 SV=1	356.2	220.1	839	662.1	648.2	558	605.9
F1PAF7	Cysteine protease OS=Canis lupus familiaris GN=ATG4B PE=3 SV=2	194.5	135	145.4	144.8	144.5	153.5	124.3
F1PAG5	Uncharacterized protein OS=Canis lupus familiaris GN=VAT1 PE=4 SV=2	429.3	377.2	195.8	205.7	209.2	180.9	216.5
F1PAG6	Arp2/3 complex 34 kDa subunit OS=Canis lupus familiaris PE=3 SV=2	431	316.6	385.3	460.6	424.8	555.2	433.8
F1PAG7	Uncharacterized protein OS=Canis lupus familiaris GN=LRPAP1 PE=4 SV=2	465.8	395.1	557.3	587.7	686.1	502.1	717
F1PAH7	Uncharacterized protein OS=Canis lupus familiaris GN=EIF4G2 PE=4 SV=2	617.4	573	522.3	554.7	582.9	637.7	548
F1PAH9	Uncharacterized protein OS=Canis lupus familiaris GN=ECHDC3 PE=4 SV=2	252.1	153.4	188.3	209	246.8	284.4	233.5
F1PAK1	Uncharacterized protein OS=Canis lupus familiaris GN=DNM1 PE=3 SV=2	1003.9	896.3	512.4	508.2	518.6	515.7	492.6
F1PAK8	Uncharacterized protein OS=Canis lupus familiaris PE=4 SV=2	266.2	143.5	257.1	341.2	316.8	370.2	258.6
F1PAL5	Uncharacterized protein OS=Canis lupus familiaris GN=AGT PE=3 SV=2	1100.3	676.5	664.4	581.2	493.3	561	705.4
F1PAM3	Isocitrate dehydrogenase [NADP] OS=Canis lupus familiaris GN=IDH2 PE=3 SV=2	465.7	443.8	342.2	353	387.1	656.4	430
F1PAM9	Uncharacterized protein OS=Canis lupus familiaris GN=EPS15 PE=4 SV=2	335.6	215	211.6	269.8	280.7	257	204.1
F1PAN3	Uncharacterized protein OS=Canis lupus familiaris GN=PDIA5 PE=4 SV=2	160.8	145.5	241.4	234.3	299.6	271.1	259
F1PAP5	Uncharacterized protein OS=Canis lupus familiaris GN=SPTAN1 PE=4 SV=2	7401	6586.3	4765.4	5123.2	5190.2	3958.3	5906.9
F1PAQ3	Uncharacterized protein OS=Canis lupus familiaris GN=MGAM PE=3 SV=2	194.6	138.7	421.9	421.9	373.4	458.5	291.7
F1PAR7	Uncharacterized protein OS=Canis lupus familiaris GN=NGFR PE=4 SV=2	98.5	53.5	304.3	162.1	225.8	71.8	384.5
F1PAR9	Epididymal secretory protein E1 OS=Canis lupus familiaris GN=NPC2 PE=4 SV=2	318	397	485.2	379.5	389	333.4	395.4
F1PAT9	Uncharacterized protein OS=Canis lupus familiaris GN=ZC2HC1A PE=4 SV=2	9.8	92.3	10.3	16.1	10.1	14.3	14.7
F1PAX2	Uncharacterized protein OS=Canis lupus familiaris GN=CP PE=3 SV=2	669.9	545.8	1518.2	1467	1268.7	1287	1238.6
F1PAY3	Signal transducer and activator of transcription OS=Canis lupus familiaris GN=STAT6 PE=3 SV=1	398.7	498.8	418.9	486.3	457.3	485.7	448.8
F1PAY7	Uncharacterized protein OS=Canis lupus familiaris GN=SORBS1 PE=4 SV=2	183.5	147.5	123.1	122.3	167.1	114	221.6
F1PAZ3	Uncharacterized protein OS=Canis lupus familiaris GN=NUP160 PE=4 SV=2	364.1	270.6	274	332.4	337.2	438.2	260.6
F1PAZ5	Uncharacterized protein OS=Canis lupus familiaris GN=ADAM23 PE=4 SV=2	157.2	154	13.1	21.6	21.8	17.3	27.4
F1PAZ6	Uncharacterized protein OS=Canis lupus familiaris GN=ECHS1 PE=3 SV=2	664.3	730.2	497.4	580.7	507.3	564.1	611.3
F1PB08	Uncharacterized protein OS=Canis lupus familiaris GN=SEPT9 PE=3 SV=2	831.2	736.7	492.3	540	563.8	494.6	596.6
F1PB14	Ribokinase OS=Canis lupus familiaris GN=RBKS PE=3 SV=2	192.4	254.5	83.8	146.6	107.4	96.7	136.8
F1PB16	Uncharacterized protein OS=Canis lupus familiaris GN=LNPK PE=4 SV=2	222.5	183	207.3	240.8	231.7	293.7	208.9
F1PB46	Uncharacterized protein OS=Canis lupus familiaris PE=4 SV=2	379.2	236.7	353.6	367.9	408.5	414.6	373.8
F1PB50	Uncharacterized protein OS=Canis lupus familiaris GN=NPC1 PE=4 SV=1	274.6	175.9	185.5	227	205.1	291.6	202.7
F1PB51	Uncharacterized protein OS=Canis lupus familiaris GN=GBF1 PE=4 SV=2	111.1	94.4	120.3	133.2	153.2	183.1	118.2
F1PB66	Tetraspanin OS=Canis lupus familiaris GN=CD81 PE=3 SV=2	428.5	147.8	211.2	187.8	181	182.5	159.9
F1PB77	Alpha-1,4 glucan phosphorylase OS=Canis lupus familiaris GN=PYGL PE=3 SV=2	165.7	203	192.1	211.5	193	218.2	200.2
F1PB92	Uncharacterized protein OS=Canis lupus familiaris GN=EML1 PE=4 SV=1	222.2	171.9	181.2	198.6	185.4	151.4	144.2
F1PB95	Intercellular adhesion molecule 1 OS=Canis lupus familiaris GN=ICAM1 PE=4 SV=2	835.3	766.8	815.6	963.1	969.8	1180.5	875.1
F1PBA1	Sodium/potassium-transporting ATPase subunit alpha OS=Canis lupus familiaris GN=ATP1A1 PE=3 SV=2	667.5	867.9	489.1	544.9	483	477.5	495.7
F1PBA8	Uncharacterized protein OS=Canis lupus familiaris GN=PML PE=4 SV=2	172.3	159.7	268.6	265.1	280.2	324.3	266.6
F1PBC7	Uncharacterized protein OS=Canis lupus familiaris GN=ACAD8 PE=3 SV=1	238.9	233.8	220.2	237.8	244.4	249.1	257.4
F1PBG0	Uncharacterized protein OS=Canis lupus familiaris GN=PRKAG1 PE=4 SV=1	139.1	103	101.2	154	144.3	159.2	108.9
F1PBG7	Sorting nexin OS=Canis lupus familiaris GN=SNX9 PE=3 SV=2	353.9	229.1	443.4	452.3	446.5	407.9	360.1
F1PBH0	Chloride intracellular channel protein OS=Canis lupus familiaris GN=CLIC1 PE=3 SV=1	462	373	426.9	491.6	441.1	497	470
F1PBI2	Uncharacterized protein OS=Canis lupus familiaris GN=DDAH2 PE=4 SV=2	425	591.5	480.3	537.1	502.5	293	638.9
F1PBI6	Uncharacterized protein OS=Canis lupus familiaris GN=THBS1 PE=4 SV=2	498	367.2	1509.2	1872.1	1661.1	987.5	1805
F1PBJ2	Uncharacterized protein OS=Canis lupus familiaris GN=STK10 PE=4 SV=2	259	209.8	230.1	241.4	252.1	283.7	242.4
F1PBJ4	Uncharacterized protein OS=Canis lupus familiaris GN=FUS PE=4 SV=2	142.2	181.1	218.9	190.5	264.3	193.5	332
F1PBJ8	Uncharacterized protein OS=Canis lupus familiaris GN=ALDH2 PE=3 SV=2	1547	1708.9	1054.3	1047.1	1056.3	1047.1	1283.8
F1PBK6	Uncharacterized protein OS=Canis lupus familiaris GN=CA1 PE=4 SV=2	535.9	259.3	822.2	720.4	696.1	544.9	598.7
F1PBK7	Uncharacterized protein OS=Canis lupus familiaris GN=PSMC3 PE=3 SV=2	260	252.5	282.4	315	283.4	268	252.7
F1PBL1	Uncharacterized protein OS=Canis lupus familiaris GN=YWHAZ PE=3 SV=2	1814.5	1802.8	883.1	957.4	992.5	989.1	1055
F1PBL3	Glycogen debranching enzyme OS=Canis lupus familiaris GN=AGL PE=4 SV=2	400.7	365.4	277.7	311.8	319.6	453.8	296.7
F1PBL4	Fibrinogen alpha chain OS=Canis lupus familiaris GN=FGA PE=4 SV=1	1193.6	1079.8	4847.6	2654.8	3106.7	2399.5	3241.5
F1PBL5	Uncharacterized protein OS=Canis lupus familiaris GN=NCAM2 PE=4 SV=2	780.1	957	289.4	286.9	319.6	262.4	355.5
F1PBM2	Uncharacterized protein OS=Canis lupus familiaris GN=VTA1 PE=4 SV=2	276	268.9	280.9	299.5	271.9	281.9	255.5
F1PBM5	Elongation factor Ts, mitochondrial OS=Canis lupus familiaris GN=METTL21B PE=3 SV=2	204.1	170.5	201.8	243.9	237.3	232.5	193.9
F1PBR3	Uncharacterized protein OS=Canis lupus familiaris GN=CADM3 PE=4 SV=2	171.9	220.7	76.6	76.9	81.1	65.1	98.6
F1PBT3	Fructose-bisphosphate aldolase OS=Canis lupus familiaris PE=3 SV=2	1748.2	1732.8	1113.8	986.5	1016.2	1263.1	1015.1
F1PBV3	Uncharacterized protein OS=Canis lupus familiaris GN=UBE3A PE=4 SV=2	34.9	33.4	26.6	31.2	37.1	47.4	30.5
F1PBX0	Uncharacterized protein OS=Canis lupus familiaris GN=TXNRD1 PE=3 SV=2	393.2	262.3	232	283.4	249.5	307.6	227.9
F1PBZ1	Uncharacterized protein OS=Canis lupus familiaris GN=LSP1 PE=4 SV=2	179	116.2	186.3	200	219.2	216.6	178.7
F1PBZ4	Uncharacterized protein OS=Canis lupus familiaris GN=NQO1 PE=4 SV=1	1045.7	1275.9	393.6	410.7	385.7	663.5	384.9
F1PBZ5	Uncharacterized protein OS=Canis lupus familiaris GN=PGM5 PE=3 SV=1	406.8	290.7	275.9	297.7	319.6	417.5	271.2
F1PC09	Uncharacterized protein OS=Canis lupus familiaris GN=RABGAP1 PE=4 SV=2	319.9	207.3	220.6	307.5	269.5	312.4	204.6
F1PC59	Uncharacterized protein OS=Canis lupus familiaris GN=PRDX6 PE=4 SV=1	872	1862.4	781.5	749	710.1	613.4	739.8
F1PC80	Uncharacterized protein OS=Canis lupus familiaris GN=LIPE PE=4 SV=2	132.8	128.5	70.7	79.7	70.4	86.1	53.1
F1PCD0	Vascular cell adhesion protein 1 OS=Canis lupus familiaris GN=VCAM1 PE=4 SV=2	330.1	324.3	432.3	493.3	459.2	343.7	488.5
F1PCD8	Uncharacterized protein OS=Canis lupus familiaris GN=LAMB1 PE=4 SV=2	568.5	450	938.7	984.7	1030.3	820.9	1173.8
F1PCD9	Uncharacterized protein OS=Canis lupus familiaris GN=MICAL1 PE=4 SV=2	370.5	371.5	398.4	519.8	541.3	463	326
F1PCE8	Uncharacterized protein OS=Canis lupus familiaris GN=LOC475521 PE=3 SV=1	282.4	263.2	370.9	389.5	347.4	376.6	333.7
F1PCG4	Uncharacterized protein OS=Canis lupus familiaris GN=PRDX2 PE=4 SV=2	703.9	668.7	1070.5	998.4	915	591.8	734.8
F1PCH3	Uncharacterized protein OS=Canis lupus familiaris GN=ENO1 PE=3 SV=2	2972.6	3764.9	1484.8	1497.1	1491.4	1527	1648.8
F1PCI3	Uncharacterized protein OS=Canis lupus familiaris GN=DHRS4 PE=4 SV=1	445	511.3	476.2	467	440.2	348.1	412.5
F1PCI6	Uncharacterized protein OS=Canis lupus familiaris GN=PALM PE=4 SV=2	303.2	482.6	250.9	282.8	287.8	199.1	330.3
F1PCK2	Uncharacterized protein OS=Canis lupus familiaris GN=A1BG PE=4 SV=2	330.1	340.9	496.8	456.4	490.1	422	448.1
F1PCK9	Uncharacterized protein OS=Canis lupus familiaris GN=FAM234A PE=4 SV=2	261.6	249.6	113.8	142.7	162.6	89.4	169.4
F1PCM1	Biliverdin reductase A OS=Canis lupus familiaris GN=BLVRA PE=3 SV=2	444.8	403.3	237.6	263.7	259.9	311.6	263.7
F1PCM9	Uncharacterized protein OS=Canis lupus familiaris GN=SH3GLB1 PE=4 SV=2	245.4	253.9	163.8	139.5	197.7	159.4	218.4
F1PCQ3	Uncharacterized protein OS=Canis lupus familiaris GN=SLC16A1 PE=4 SV=1	282.7	298.5	313	436.4	426.9	429.4	353.5
F1PCR1	Uncharacterized protein OS=Canis lupus familiaris GN=SIPA1 PE=4 SV=2	445	174.8	316.3	315.7	258.7	221.1	226.3
F1PCS8	Uncharacterized protein OS=Canis lupus familiaris GN=CD93 PE=4 SV=1	66.5	34.5	151.2	181.1	161.2	236.1	161.2
F1PCT1	Uncharacterized protein OS=Canis lupus familiaris GN=BRK1 PE=4 SV=2	122.2	187.5	116.6	139.3	132.4	131.7	115.2
F1PCT7	Dolichyl-diphosphooligosaccharide--protein glycosyltransferase subunit 2 OS=Canis lupus familiaris GN=RPN2 PE=1 SV=3	179.7	170.7	338.1	346	381.6	448.3	306.8
F1PCV3	Uncharacterized protein OS=Canis lupus familiaris GN=ACE PE=3 SV=2	780.9	603.9	458	497.6	492.1	441.2	505
F1PCX5	Uncharacterized protein OS=Canis lupus familiaris GN=RNF185 PE=4 SV=2	26.3	38.4	47.8	40.8	52.9	46.3	67.3
F1PCZ0	Uncharacterized protein OS=Canis lupus familiaris GN=SEPT5 PE=3 SV=2	818	709	416.8	531	548.6	368.8	535.4
F1PCZ5	Microtubule-associated protein OS=Canis lupus familiaris GN=MAP4 PE=4 SV=2	2448.5	2946.9	2238.2	2664.6	2602.5	2379.7	2762.3
F1PD00	Uncharacterized protein OS=Canis lupus familiaris GN=CAMK1D PE=3 SV=2	400.6	464.3	345.2	389.3	349.6	408.4	389
F1PD07	Uncharacterized protein OS=Canis lupus familiaris GN=DARS2 PE=3 SV=2	155.4	96.4	141.5	160.5	203.5	204.4	143.9
F1PD21	Uncharacterized protein OS=Canis lupus familiaris GN=CLASP1 PE=4 SV=2	272	151.9	138.7	161.5	161.5	164.8	146.2
F1PD30	Uncharacterized protein OS=Canis lupus familiaris GN=TBCE PE=4 SV=2	142.1	103.9	98.6	94	85.1	90.2	99.3
F1PD37	Serine/threonine-protein phosphatase 2A activator OS=Canis lupus familiaris GN=PTPA PE=3 SV=2	314.7	422.9	342.6	330.5	328.8	257	321.3
F1PD51	Uncharacterized protein OS=Canis lupus familiaris GN=EPB42 PE=4 SV=2	501.4	363.8	1451.1	1390.7	1119.2	1089.4	899.2
F1PD65	Uncharacterized protein OS=Canis lupus familiaris PE=3 SV=2	363.5	424.9	170	217.4	210.7	200.3	203.9
F1PD77	Uncharacterized protein OS=Canis lupus familiaris GN=PSME2 PE=4 SV=2	398	256.6	308.5	400.7	392.3	595.2	350.9
F1PD82	Terpene cyclase/mutase family member OS=Canis lupus familiaris GN=LSS PE=3 SV=2	135.9	31.2	22.3	13.1	29.7	28.6	32.2
F1PDB4	ATP synthase subunit beta OS=Canis lupus familiaris GN=ATP5B PE=2 SV=1	1258.7	1125.2	852.3	831.2	832.2	897.5	860.4
F1PDC7	Uncharacterized protein OS=Canis lupus familiaris GN=NOTCH1 PE=4 SV=2	116.5	100.1	84	91.1	71	70.3	108.9
F1PDD1	Uncharacterized protein OS=Canis lupus familiaris GN=WDR18 PE=4 SV=2	32.4	20	69	55.1	69	54	71.1
F1PDF1	Uncharacterized protein OS=Canis lupus familiaris GN=RAB34 PE=4 SV=2	40.6	44.4	119.4	129.9	107.5	79.2	102.6
F1PDG5	Uncharacterized protein OS=Canis lupus familiaris GN=CD68 PE=3 SV=2	188.9	655.8	341.8	477.6	293.9	477.8	289.3
F1PDI0	Uncharacterized protein OS=Canis lupus familiaris GN=SCARF2 PE=4 SV=2	51.7	26.5	186.3	173.9	158.4	115.1	241
F1PDJ0	Apolipoprotein C-III OS=Canis lupus familiaris GN=APOC3 PE=4 SV=1	110.2	109.6	255.6	328.9	268.9	334.8	235.1
F1PDJ5	Apolipoprotein A-I OS=Canis lupus familiaris GN=APOA1 PE=3 SV=1	2272.9	2034.5	8355.1	6682.5	6583.3	4400.8	5530.9
F1PDJ7	Uncharacterized protein OS=Canis lupus familiaris GN=AZGP1 PE=3 SV=2	285.9	241.7	572.9	448.6	439	431.6	381.3
F1PDK1	Uncharacterized protein OS=Canis lupus familiaris GN=LTBP4 PE=4 SV=2	220.9	134.2	683.1	597.7	572.3	281.4	666.6
F1PDM3	Uncharacterized protein OS=Canis lupus familiaris GN=SEC13 PE=4 SV=2	298.9	239	351.9	390.7	379.2	416.4	397.4
F1PDN4	Uncharacterized protein OS=Canis lupus familiaris GN=CNTNAP1 PE=4 SV=1	246.5	382.3	180.3	198	168.5	163.9	188.3
F1PDN8	Uncharacterized protein OS=Canis lupus familiaris GN=ITIH5 PE=4 SV=2	433.8	211.9	418.3	346	387.9	295.1	575.5
F1PDP5	Uncharacterized protein OS=Canis lupus familiaris GN=CD276 PE=4 SV=2	290.4	129.5	309	422.9	321.4	310	346.5
F1PDQ0	Uncharacterized protein OS=Canis lupus familiaris GN=NPTN PE=4 SV=2	356.4	422.2	309.8	295.3	318.7	291.7	364.3
F1PDQ2	Uncharacterized protein OS=Canis lupus familiaris GN=DMTN PE=4 SV=2	53.9	184.5	386.8	412.3	282.4	109.4	193.1
F1PDQ4	Uncharacterized protein OS=Canis lupus familiaris GN=CYFIP1 PE=4 SV=2	872.5	646.1	501.7	609.1	592	696.2	521.7
F1PDR0	CD166 antigen OS=Canis lupus familiaris GN=ALCAM PE=4 SV=2	898.9	666.8	722.6	708.6	787.5	506.9	979
F1PDT4	Uncharacterized protein OS=Canis lupus familiaris GN=SH3GL2 PE=4 SV=2	489.1	835.3	321.2	336.9	320.5	262	317.3
F1PDT7	Uncharacterized protein OS=Canis lupus familiaris GN=AP2A2 PE=4 SV=2	791.4	760.3	698.7	747.4	685	733.5	697.3
F1PDX9	T-complex protein 1 subunit gamma OS=Canis lupus familiaris GN=CCT3 PE=3 SV=2	213.1	224.1	119.8	136.2	96.2	77.2	122.7
F1PDY2	Uncharacterized protein OS=Canis lupus familiaris GN=COPZ2 PE=4 SV=1	243.6	180.5	390.4	584	462.1	391.9	557.8
F1PDY8	Uncharacterized protein OS=Canis lupus familiaris GN=CA2 PE=4 SV=2	1106.9	685.6	1567.7	1422.7	1299.8	1019.3	1068.9
F1PDZ7	Uncharacterized protein OS=Canis lupus familiaris GN=CA3 PE=4 SV=2	353.7	340.9	608.9	394.6	480.5	1649.6	367.4
F1PE09	6-phosphogluconate dehydrogenase, decarboxylating OS=Canis lupus familiaris GN=PGD PE=3 SV=2	1361.8	1215.4	1153.3	1271.4	1122.3	1176.2	1127.3
F1PE15	Uncharacterized protein OS=Canis lupus familiaris GN=GLIPR1 PE=3 SV=1	19.5	16.8	52.1	71	61.8	119.1	50.7
F1PE20	Uncharacterized protein OS=Canis lupus familiaris GN=PLEKHA7 PE=4 SV=2	180.1	146.4	76.1	81.6	81.9	83.1	86.4
F1PE28	Uncharacterized protein OS=Canis lupus familiaris GN=TKT PE=4 SV=2	1440.8	2608	1345.8	1450.2	1507.8	1843.5	1421.6
F1PE35	Platelet-derived growth factor receptor beta OS=Canis lupus familiaris GN=PDGFRB PE=3 SV=2	172.1	121.9	282.2	303.6	308.5	264.7	304.5
F1PE38	Uncharacterized protein OS=Canis lupus familiaris GN=CDH13 PE=4 SV=2	222.1	124.6	366.2	448.4	413.7	642.9	467.5
F1PE53	Uncharacterized protein OS=Canis lupus familiaris GN=ROCK2 PE=3 SV=2	642.9	482	492.1	564.2	550.3	555	503.4
F1PEA6	Uncharacterized protein OS=Canis lupus familiaris GN=DDX5 PE=3 SV=2	136.5	93.6	144.5	138.1	121.5	105.3	104.7
F1PEB5	Uncharacterized protein OS=Canis lupus familiaris GN=AQP4 PE=3 SV=2	638.2	1174.9	278.7	261.6	274.6	215.2	324.7
F1PED7	Poly [ADP-ribose] polymerase OS=Canis lupus familiaris GN=PARP3 PE=4 SV=1	53.8	20.2	50.2	33.2	55.5	69.9	47.2
F1PEE3	Tight junction protein ZO-2 OS=Canis lupus familiaris GN=TJP2 PE=4 SV=2	555.8	640.3	289.2	243.9	289.5	236.5	275.6
F1PEG4	Uncharacterized protein OS=Canis lupus familiaris GN=MAMDC2 PE=4 SV=2	79.8	51	142.2	137	154.3	236	114.8
F1PEG9	Uncharacterized protein OS=Canis lupus familiaris GN=RCN2 PE=4 SV=2	93	89.1	51.2	58.1	54.3	64.3	53.6
F1PEH8	Uncharacterized protein OS=Canis lupus familiaris GN=PSTPIP1 PE=4 SV=2	210.9	176.1	284.9	287.7	272.8	265.9	261.7
F1PEI2	Uncharacterized protein OS=Canis lupus familiaris GN=CKAP4 PE=4 SV=2	728.5	603.3	1198.7	1229	1291.5	1267.3	1131.2
F1PEK5	Uncharacterized protein OS=Canis lupus familiaris GN=SEPT2 PE=3 SV=2	595.8	478.5	333.4	366.4	421.1	316.8	412.6
F1PEL5	Uncharacterized protein OS=Canis lupus familiaris GN=ZC3H15 PE=4 SV=2	190.1	181.4	264.8	194.3	246.9	208.5	275.7
F1PEM6	Uncharacterized protein OS=Canis lupus familiaris GN=HOMER3 PE=4 SV=2	770.7	778.2	240.6	280.2	282.4	356.6	262
F1PEM7	Uncharacterized protein OS=Canis lupus familiaris GN=IGFBP2 PE=4 SV=1	99	79.2	117.9	103.2	130.8	89.5	139.7
F1PEN6	Transferrin receptor protein 1 OS=Canis lupus familiaris GN=TFRC PE=2 SV=1	138.9	72.2	333.2	330.8	326.3	429.2	318.7
F1PER9	Uncharacterized protein OS=Canis lupus familiaris GN=FNBP1 PE=4 SV=2	517.2	496.7	240.6	220.8	275.1	273.6	253
F1PEU6	Uncharacterized protein OS=Canis lupus familiaris GN=HMCN2 PE=4 SV=2	33.8	19.4	96.5	78.3	75.8	250.2	72.5
F1PEX0	Uncharacterized protein OS=Canis lupus familiaris GN=CC2D1B PE=4 SV=2	236.8	235.9	113.6	130.3	134.2	133.8	123.5
F1PEX8	Uncharacterized protein OS=Canis lupus familiaris GN=SLC25A24 PE=3 SV=2	207.2	190.7	266.1	232.3	266.7	238.6	235.2
F1PEZ0	Uncharacterized protein OS=Canis lupus familiaris GN=SRSF4 PE=4 SV=2	205.4	208.2	279	270.8	252.8	219.5	357.7
F1PF02	Proteasome subunit beta type OS=Canis lupus familiaris GN=PSMB1 PE=3 SV=2	376.5	273.1	329.6	224.3	240.1	266.5	272.5
F1PF06	Sodium channel protein OS=Canis lupus familiaris GN=SCN7A PE=3 SV=2	746.8	453.6	384.7	361.3	398.7	261.1	372.3
F1PF09	Uncharacterized protein OS=Canis lupus familiaris GN=PMPCA PE=3 SV=2	122.7	89.7	182	255.3	217.6	266.9	227.9
F1PF47	Uncharacterized protein OS=Canis lupus familiaris GN=UFL1 PE=4 SV=2	122.6	94.3	125.7	118.5	140.8	161.3	116.8
F1PF62	Uncharacterized protein OS=Canis lupus familiaris GN=MOB2 PE=4 SV=2	37.9	32.2	68.6	47.5	54.9	50.3	70.1
F1PF82	Uncharacterized protein OS=Canis lupus familiaris GN=SMS PE=4 SV=1	528.1	1109.4	248.9	320.8	325.7	336.7	329.5
F1PF85	Uncharacterized protein OS=Canis lupus familiaris GN=RPL14 PE=4 SV=2	270.7	143.2	112.3	109.5	103.3	92.8	172.1
F1PF90	Uncharacterized protein OS=Canis lupus familiaris PE=4 SV=2	161.5	140.9	479.9	462.1	544.8	273.3	280.3
F1PF95	Alkaline phosphatase OS=Canis lupus familiaris GN=ALPL PE=3 SV=2	183	192.3	503.4	498	388.1	237.6	736.8
F1PFB3	Uncharacterized protein OS=Canis lupus familiaris GN=GLRX3 PE=4 SV=2	236.9	304.4	182.2	210.9	233.8	317.7	202.7
F1PFB4	Uncharacterized protein OS=Canis lupus familiaris GN=FERMT2 PE=4 SV=2	396.5	289.4	357.2	435.4	383.9	326.7	401
F1PFB8	Uncharacterized protein OS=Canis lupus familiaris GN=DNM3 PE=3 SV=2	422.6	535.8	313.9	281.2	333.8	267.1	284
F1PFC6	Uncharacterized protein OS=Canis lupus familiaris PE=4 SV=2	602.7	440.2	462.7	499.2	565.4	489.3	677.7
F1PFD0	Sorting nexin OS=Canis lupus familiaris GN=SNX6 PE=3 SV=2	560	481.7	438.2	421.9	467.1	393.5	459.5
F1PFD8	Uncharacterized protein OS=Canis lupus familiaris GN=SEPHS1 PE=4 SV=2	199.3	148.2	219.1	262	273.4	258	273.2
F1PFE9	Uncharacterized protein OS=Canis lupus familiaris GN=NUP85 PE=4 SV=2	199.2	131.2	172.6	169	164.2	214.3	169.4
F1PFF2	Protein S100 OS=Canis lupus familiaris GN=S100A11 PE=3 SV=2	247.6	292	297.4	396.6	327.6	398.6	438.3
F1PFF8	Amine oxidase OS=Canis lupus familiaris GN=MAOB PE=3 SV=1	147.3	379	73.1	86.5	77.9	44.6	72.9
F1PFG6	Uncharacterized protein OS=Canis lupus familiaris GN=PDCD6IP PE=4 SV=2	1347.9	1333.4	1066.3	1132.7	1054.5	968.6	1022.5
F1PFI3	Uncharacterized protein OS=Canis lupus familiaris GN=PLCB3 PE=4 SV=2	225.3	322.9	203.1	257.1	258.6	269.4	243.5
F1PFK6	Importin subunit alpha OS=Canis lupus familiaris GN=KPNA1 PE=3 SV=2	315.8	297.3	296.3	309.5	297.8	317.7	248.8
F1PFL7	Uncharacterized protein OS=Canis lupus familiaris GN=AIF1L PE=4 SV=2	504.5	498.8	110.4	132.8	132	126.7	126
F1PFM6	Uncharacterized protein OS=Canis lupus familiaris GN=COL6A1 PE=4 SV=2	918.7	834.7	3815.2	2683.3	2778.7	2452.5	2849.9
F1PFN4	Uncharacterized protein OS=Canis lupus familiaris GN=NAA15 PE=4 SV=2	691.3	456.3	363.4	376	385.6	629.4	354.9
F1PFR3	Histone-lysine N-methyltransferase OS=Canis lupus familiaris GN=SETD7 PE=3 SV=2	243	174.9	194.7	263.9	271.5	263.2	210.2
F1PFS9	Uncharacterized protein OS=Canis lupus familiaris GN=LOC478000 PE=4 SV=2	161.1	149.1	258.2	264.5	210.8	236.8	215.6
F1PFZ5	Uncharacterized protein OS=Canis lupus familiaris GN=MFGE8 PE=4 SV=2	656.2	677	1199	1565.1	1350.6	895.2	1453.9
F1PFZ9	Uncharacterized protein OS=Canis lupus familiaris GN=ADAM17 PE=4 SV=2	188.9	164.1	153.5	163.1	190.4	207.4	191
F1PG05	Uncharacterized protein OS=Canis lupus familiaris GN=COL2A1 PE=4 SV=2	794.3	707.2	1368.1	1440	1179.3	937.1	1608.8
F1PG08	Uncharacterized protein OS=Canis lupus familiaris GN=COL5A2 PE=4 SV=2	49.2	54.4	168.7	205.8	186.1	192.2	379.3
F1PG13	Uncharacterized protein OS=Canis lupus familiaris GN=UBE2O PE=3 SV=2	491.7	336	349.7	360.5	336.8	308.5	334.9
F1PG16	Uncharacterized protein OS=Canis lupus familiaris GN=CD5L PE=4 SV=2	240.7	232.9	709.9	629.7	565.8	382.2	593.1
F1PG39	Uncharacterized protein OS=Canis lupus familiaris GN=ITIH2 PE=4 SV=2	831	494.5	1534.1	1144.8	1105.6	806.1	1058.4
F1PG47	Uncharacterized protein OS=Canis lupus familiaris GN=NDUFB11 PE=4 SV=2	119.9	141.3	91.8	118.7	101	307.4	81.5
F1PG59	Uncharacterized protein OS=Canis lupus familiaris GN=COPS6 PE=4 SV=2	246.8	233.9	123.1	133.6	138.4	187.2	178.7
F1PG85	Uncharacterized protein OS=Canis lupus familiaris GN=SLC44A2 PE=3 SV=2	278.9	318.2	204.1	221.5	244.8	275.8	274
F1PG95	Uncharacterized protein OS=Canis lupus familiaris GN=CSDE1 PE=4 SV=2	561	608	466.3	439.8	475.7	391.9	475.5
F1PG97	Uncharacterized protein OS=Canis lupus familiaris GN=ARIH1 PE=3 SV=2	103.7	67.8	56.8	91.8	98.1	122.7	85.4
F1PGA9	Uncharacterized protein OS=Canis lupus familiaris GN=OPLAH PE=4 SV=2	86.7	130.4	95.2	109.9	129.9	96.5	130.4
F1PGB1	Uncharacterized protein OS=Canis lupus familiaris GN=STK4 PE=4 SV=2	207.1	199.7	328	365.8	327.8	386.5	356.9
F1PGB6	Uncharacterized protein OS=Canis lupus familiaris GN=ILF3 PE=4 SV=2	269.5	141.2	308.3	379.1	375.1	420.3	328.5
F1PGD7	Uncharacterized protein OS=Canis lupus familiaris GN=RPL24 PE=4 SV=2	372	213.9	276.8	297.9	279.3	313.9	291.1
F1PGE7	Uncharacterized protein OS=Canis lupus familiaris GN=STX1B PE=3 SV=2	1060.9	796.4	318.6	320.4	319	360.9	318
F1PGG9	Uncharacterized protein OS=Canis lupus familiaris GN=GAK PE=4 SV=2	116.3	96.8	140.9	160.3	159.1	187.3	139.6
F1PGH6	Uncharacterized protein OS=Canis lupus familiaris GN=PRPH PE=3 SV=2	1427.6	2017.9	1407.2	1154	1233.9	677.7	1617.9
F1PGI1	Ras-related protein Rab-21 OS=Canis lupus familiaris GN=RAB21 PE=4 SV=2	205.1	133.2	130.6	162.3	146.5	154	138.6
F1PGJ3	Uncharacterized protein OS=Canis lupus familiaris GN=GFPT2 PE=4 SV=2	325.9	164.9	196	172.9	212.6	238.1	206.2
F1PGJ5	Uncharacterized protein OS=Canis lupus familiaris GN=SCARB2 PE=3 SV=2	321.2	289.8	323.5	388.7	347.2	364.7	382.4
F1PGL1	Uncharacterized protein OS=Canis lupus familiaris GN=VCAN PE=4 SV=2	1371.2	1913.2	1540.9	1879.9	1556.7	1290	1570.6
F1PGL4	Uncharacterized protein OS=Canis lupus familiaris GN=CPSF6 PE=4 SV=1	165	145.4	383.2	334.2	354.1	335.5	418.2
F1PGL5	Uncharacterized protein OS=Canis lupus familiaris GN=CPM PE=4 SV=2	328.2	274.8	237.4	325.2	261.1	364.8	240
F1PGL8	Uncharacterized protein OS=Canis lupus familiaris GN=AKAP12 PE=4 SV=2	2539.4	2891	1494	1614.2	1800.7	1204.9	1961.4
F1PGM8	Uncharacterized protein OS=Canis lupus familiaris PE=4 SV=2	288.4	231.7	454.6	432.5	426.3	388	460.9
F1PGM9	Uncharacterized protein OS=Canis lupus familiaris GN=C4BPA PE=4 SV=2	898.8	832.6	2548.5	2320.3	1866.5	1807.6	1836.7
F1PGN5	Uncharacterized protein OS=Canis lupus familiaris GN=PTPRZ1 PE=4 SV=2	657.1	482.4	168.9	178.6	186.5	250.8	178.1
F1PGP3	Uncharacterized protein OS=Canis lupus familiaris GN=FAM3C PE=4 SV=2	126.7	81	149.9	175.8	177.9	227.5	208.6
F1PGQ7	Uncharacterized protein OS=Canis lupus familiaris GN=PIP4K2B PE=4 SV=2	155	144.4	218.9	224.5	209.5	151	174.5
F1PGR0	Uncharacterized protein OS=Canis lupus familiaris GN=ADAM10 PE=4 SV=2	240.3	197.3	255.2	275.3	243.6	220.1	295
F1PGR5	Uncharacterized protein OS=Canis lupus familiaris GN=ENTPD1 PE=3 SV=1	90.8	80.4	78.5	107.5	99.7	236.7	120.4
F1PGS0	DNA-directed RNA polymerase subunit OS=Canis lupus familiaris GN=POLR2A PE=3 SV=2	89.5	49.6	83	88.7	103.9	140.4	87.2
F1PGU1	Uncharacterized protein OS=Canis lupus familiaris GN=MYLPF PE=4 SV=2	153.8	106.4	388.3	235.7	280	728.7	200.6
F1PGW5	Uncharacterized protein OS=Canis lupus familiaris GN=C16orf62 PE=4 SV=2	286.1	224.6	328.5	305.3	336.2	269.1	314.1
F1PGX9	Uncharacterized protein OS=Canis lupus familiaris GN=SLC2A13 PE=3 SV=2	63.6	64.3	99.3	99.5	112.1	162	103.3
F1PGY1	Uncharacterized protein OS=Canis lupus familiaris GN=HSP90AA1 PE=4 SV=2	4931.5	4249.7	1957.6	2031	2222.3	2259.1	2413.3
F1PGY4	Uncharacterized protein OS=Canis lupus familiaris GN=PSMD14 PE=4 SV=2	251	215.5	199.2	231	225.5	243.6	214.6
F1PGY6	Uncharacterized protein OS=Canis lupus familiaris GN=TOLLIP PE=4 SV=2	131.3	450.1	216.3	293.6	258.6	267.8	241
F1PGY9	Uncharacterized protein OS=Canis lupus familiaris GN=DYNC1H1 PE=4 SV=2	6363.8	5215.1	3004.9	3316.7	3276.1	3386.8	2906.6
F1PGZ8	Uncharacterized protein OS=Canis lupus familiaris GN=GPRC5B PE=4 SV=2	181.4	331.6	79.3	83.8	98.8	83.8	89.5
F1PH18	Uncharacterized protein OS=Canis lupus familiaris GN=GCAT PE=3 SV=2	158.7	138.9	146.4	141.9	153.1	153.6	153.3
F1PH54	Uncharacterized protein OS=Canis lupus familiaris GN=ARMC6 PE=4 SV=2	209.1	260	153.7	129.3	161.6	156.3	184.8
F1PH57	Uncharacterized protein OS=Canis lupus familiaris GN=NCKAP1 PE=4 SV=2	245.6	245.3	182.3	189.6	189.1	151	219.3
F1PH79	Uncharacterized protein OS=Canis lupus familiaris GN=ARHGEF10 PE=4 SV=2	197.7	161.9	110.9	112	132.2	781.5	108.8
F1PH87	Uncharacterized protein OS=Canis lupus familiaris GN=SERPINA3 PE=3 SV=2	77.5	218.9	97.3	83.2	89.8	75.3	127.6
F1PH98	Uncharacterized protein OS=Canis lupus familiaris GN=SLC7A5 PE=4 SV=2	294.9	304.3	127.6	125	143.6	104.5	191.5
F1PHB5	Uncharacterized protein OS=Canis lupus familiaris GN=HSPA12A PE=4 SV=2	659.1	783.8	390	409.9	464.5	344.2	438.8
F1PHD0	Uncharacterized protein OS=Canis lupus familiaris GN=CEL PE=3 SV=1	129.1	111.5	303.2	315.3	238.2	244.5	194.1
F1PHE6	Prefoldin subunit 4 OS=Canis lupus familiaris GN=PFDN4 PE=3 SV=2	73.2	59.8	124.1	85.9	83.2	78.3	69
F1PHF0	N-acetylgalactosamine-6-sulfatase OS=Canis lupus familiaris GN=GALNS PE=4 SV=2	928.2	294.5	276.2	342.4	280.5	318.7	311.7
F1PHF7	Uncharacterized protein OS=Canis lupus familiaris GN=CCNY PE=3 SV=2	155.4	81.2	68	84.2	115.4	125.8	81.8
F1PHG9	Phospholipid-transporting ATPase OS=Canis lupus familiaris GN=ATP8A1 PE=3 SV=2	229.4	289.2	112.3	145.8	123.5	141.2	113.3
F1PHH3	Uncharacterized protein OS=Canis lupus familiaris GN=PTK7 PE=3 SV=1	217.6	193.2	335.5	329.1	367.2	344.1	394.6
F1PHH6	Uncharacterized protein OS=Canis lupus familiaris GN=GDA PE=4 SV=2	142.1	122.1	134.4	255.5	122.9	135.3	165.9
F1PHJ0	Uncharacterized protein OS=Canis lupus familiaris GN=SLC30A9 PE=4 SV=2	224.2	402	157	151.5	141.2	277.3	230
F1PHK9	Uncharacterized protein OS=Canis lupus familiaris GN=LAMC1 PE=4 SV=2	993.5	764.3	1719.8	1749.4	1813.8	1702.2	2015.4
F1PHN8	Uncharacterized protein OS=Canis lupus familiaris GN=SERPINA4 PE=3 SV=2	243.4	388.5	409.7	352.8	378	301.6	612.4
F1PHN9	Uncharacterized protein OS=Canis lupus familiaris GN=UBFD1 PE=4 SV=2	310.8	362.4	275.7	335.2	307	372.7	304.1
F1PHP1	Uncharacterized protein OS=Canis lupus familiaris GN=TXNDC5 PE=3 SV=2	509.6	302.2	494.9	534.7	561.2	668.1	645.8
F1PHQ0	Clathrin heavy chain OS=Canis lupus familiaris GN=CLTC PE=3 SV=2	2624.5	2528.1	2191	2315.7	2296.4	2445.5	2145.8
F1PHQ7	Calcium-transporting ATPase OS=Canis lupus familiaris GN=ATP2B4 PE=3 SV=2	662.1	629.6	497	494.5	542.1	525.2	486.1
F1PHR2	Pyruvate kinase OS=Canis lupus familiaris GN=PKM PE=3 SV=2	3311.5	2837	1325.7	1436	1470.2	1532.4	1398.6
F1PHR6	Eukaryotic translation initiation factor 3 subunit L OS=Canis lupus familiaris GN=EIF3L PE=3 SV=2	326.6	255.7	227.3	238.2	253.4	265.6	240
F1PHS2	Uncharacterized protein OS=Canis lupus familiaris GN=SERPINA6 PE=3 SV=2	817.2	715.9	1150.1	1114.6	992.4	1182.3	986.1
F1PHS5	Uncharacterized protein OS=Canis lupus familiaris GN=PLEC PE=4 SV=2	8822.3	6590.6	9401.6	10943.3	10577.9	10714.3	10468.2
F1PHS6	Uncharacterized protein OS=Canis lupus familiaris GN=PI16 PE=3 SV=2	218.1	149	259.4	327.9	377.7	162.5	301.3
F1PHS7	Coatomer subunit gamma OS=Canis lupus familiaris GN=COPG2 PE=3 SV=2	45.6	131.9	144.3	128.3	154.9	164.2	152.1
F1PHT0	Uncharacterized protein OS=Canis lupus familiaris GN=LARP1 PE=4 SV=2	72.3	78.9	51.3	66.7	59.3	58.3	58.8
F1PHV6	Uncharacterized protein OS=Canis lupus familiaris GN=LOC100856635 PE=4 SV=2	562.2	422.2	704.5	526.1	602.7	566.3	756.8
F1PHX2	Uncharacterized protein OS=Canis lupus familiaris GN=PREP PE=4 SV=2	401.6	338.4	259.7	286.9	308.6	337.5	301.9
F1PHX8	Uncharacterized protein OS=Canis lupus familiaris GN=COL5A1 PE=4 SV=2	691.3	537.1	1060.3	1042.8	1126.3	1218.9	1745.2
F1PHY1	Collagen alpha-2(I) chain OS=Canis lupus familiaris GN=COL1A2 PE=4 SV=1	1124.5	951.4	2743.4	3180.7	2626.1	2064.3	4100.8
F1PHY6	Uncharacterized protein OS=Canis lupus familiaris GN=NBAS PE=4 SV=2	290.5	205.6	253.4	226.8	260.2	275	240.1
F1PHZ3	Uncharacterized protein OS=Canis lupus familiaris GN=PITPNB PE=4 SV=2	786	511.3	436.3	403.8	401.2	433	463.7
F1PI06	Uncharacterized protein OS=Canis lupus familiaris GN=ALDH16A1 PE=4 SV=2	245.7	223.7	351.2	381.1	345.8	310.1	296.4
F1PI16	60S ribosomal protein L13a OS=Canis lupus familiaris GN=RPL13A PE=3 SV=1	478.4	445.4	482.6	468.6	477.5	574.5	474.9
F1PI25	Sideroflexin OS=Canis lupus familiaris GN=SFXN1 PE=3 SV=2	289.2	449.3	255.2	257.5	269.7	254.4	239.3
F1PI88	Uncharacterized protein OS=Canis lupus familiaris GN=GALE PE=3 SV=2	177.7	154.7	209.5	173.1	167.8	180.4	161.2
F1PIA2	Ubiquitin thioesterase OS=Canis lupus familiaris GN=OTUB1 PE=3 SV=2	326.3	254.1	110.8	137	132.3	130.9	130.8
F1PIA3	Uncharacterized protein OS=Canis lupus familiaris GN=FBN1 PE=4 SV=2	4752.6	4149.3	22376.9	17258.8	15578.7	8827.3	13109.6
F1PIC7	Uncharacterized protein OS=Canis lupus familiaris GN=HSPA5 PE=3 SV=2	2247.5	2126	2431.2	2408.8	2792.2	2923.8	2799.9
F1PID8	Uncharacterized protein OS=Canis lupus familiaris GN=DDX17 PE=3 SV=2	506.2	480.9	746.4	666.2	801.8	748.2	747.3
F1PIE1	Uncharacterized protein OS=Canis lupus familiaris GN=RABGGTA PE=4 SV=2	325.9	389.3	160.8	189.6	178.9	226.5	151.5
F1PIF2	Uncharacterized protein OS=Canis lupus familiaris GN=CTSZ PE=3 SV=2	474.4	373.8	484.3	522	519.5	591.7	543.7
F1PIF6	Uncharacterized protein OS=Canis lupus familiaris GN=MYLK PE=4 SV=2	289.5	210.5	298.9	377.7	357.5	211.7	327.9
F1PIG2	UMP-CMP kinase OS=Canis lupus familiaris GN=CMPK1 PE=3 SV=2	222.9	319.6	227.3	228.4	231.9	244.6	243.9
F1PIG8	Myelin-oligodendrocyte glycoprotein OS=Canis lupus familiaris GN=MOG PE=3 SV=2	585.4	2207.3	495.1	467	484.5	435.9	465.3
F1PIJ6	Uncharacterized protein OS=Canis lupus familiaris GN=PPA1 PE=4 SV=2	612.8	714.9	395.2	413.5	425.2	469.4	444
F1PIK5	Uncharacterized protein OS=Canis lupus familiaris GN=PEA15 PE=4 SV=1	460	1119.2	203.1	219.8	252.6	288.7	282.7
F1PIL5	Calsequestrin OS=Canis lupus familiaris GN=CASQ1 PE=3 SV=2	345.1	332.3	296.7	264.7	294.5	1180.5	319.4
F1PIL9	Uncharacterized protein OS=Canis lupus familiaris GN=IL1RAP PE=4 SV=2	212.9	100	194.7	232.7	214.4	228.3	150.8
F1PIP0	Uncharacterized protein OS=Canis lupus familiaris GN=HADHA PE=3 SV=2	987.3	1073	694	606.4	696.5	768	714.9
F1PIS1	Uncharacterized protein OS=Canis lupus familiaris GN=STIM1 PE=4 SV=2	79.1	39.6	78.5	63.6	66.8	81	55.7
F1PIT2	Uncharacterized protein OS=Canis lupus familiaris GN=VPS37C PE=4 SV=2	223.6	218	381.6	366.8	372	392.1	250.1
F1PIT4	Tetraspanin OS=Canis lupus familiaris GN=CD63 PE=3 SV=2	289	258	493.6	545.7	466.6	533	426.4
F1PIT7	Uncharacterized protein OS=Canis lupus familiaris GN=TMX4 PE=4 SV=2	86.9	139.7	110	157.6	132.6	123.1	139.2
F1PIU6	Uncharacterized protein OS=Canis lupus familiaris GN=ITGA7 PE=3 SV=2	264.8	308	211	222.7	260.4	234.6	302.9
F1PIV8	Uncharacterized protein OS=Canis lupus familiaris GN=EFHD2 PE=4 SV=2	286.5	459.8	318	339.7	359.7	304.1	461.8
F1PIX5	Uncharacterized protein OS=Canis lupus familiaris GN=TMX3 PE=4 SV=2	134.5	75.8	110.9	151.9	202.8	211	142.8
F1PIX8	Uncharacterized protein OS=Canis lupus familiaris GN=C3 PE=4 SV=2	3696	3082.6	9823.7	7190.1	6932.7	6218.2	7464.4
F1PIY1	Non-specific serine/threonine protein kinase OS=Canis lupus familiaris GN=PRKAA1 PE=4 SV=2	283.8	222.8	157.4	165.4	179.9	171.5	156
F1PIY9	Uncharacterized protein OS=Canis lupus familiaris GN=TRIP10 PE=4 SV=2	344.4	259.2	274.2	304.9	318.7	288.4	299.1
F1PIZ2	Uncharacterized protein OS=Canis lupus familiaris GN=DNAJC6 PE=4 SV=2	554	393.4	316.9	289.6	305	290.7	297.4
F1PJ01	Uncharacterized protein OS=Canis lupus familiaris GN=MYH11 PE=3 SV=2	746	428.7	788.8	923.7	974.1	1053.5	699.8
F1PJ13	Succinyl-CoA:3-ketoacid-coenzyme A transferase OS=Canis lupus familiaris GN=OXCT1 PE=3 SV=2	431.7	348	740.3	740.8	743.3	675.9	841.1
F1PJ26	Autophagy-related protein 3 OS=Canis lupus familiaris GN=ATG3 PE=3 SV=2	247.1	151.4	122.9	146.4	137.4	133.8	114.5
F1PJ62	Uncharacterized protein OS=Canis lupus familiaris GN=BIN1 PE=4 SV=2	427.8	542.5	264.4	250.6	296.6	324.7	282.8
F1PJ65	Uncharacterized protein OS=Canis lupus familiaris GN=IQGAP1 PE=4 SV=2	1031.1	1104.8	1293.3	1370.1	1430.2	1426.6	1340.2
F1PJ74	Apolipoprotein E OS=Canis lupus familiaris GN=APOE PE=3 SV=1	1351.9	1218	1807.3	1831.2	1172.5	786.7	2633.9
F1PJ81	Uncharacterized protein OS=Canis lupus familiaris GN=FAM188A PE=4 SV=2	177	168.3	124.1	109.7	123.3	98.3	104.5
F1PJ98	Uncharacterized protein OS=Canis lupus familiaris GN=ANK3 PE=4 SV=2	287.4	161.3	160.8	185	199.8	243.8	173.3
F1PJA5	Uncharacterized protein OS=Canis lupus familiaris GN=TSC22D1 PE=4 SV=2	133.8	193.2	113.9	153.5	145.4	127.7	136.5
F1PJE6	Uncharacterized protein OS=Canis lupus familiaris GN=LRRC17 PE=4 SV=2	91.2	41.9	181.2	143.4	171.7	248.1	120.8
F1PJF2	Uncharacterized protein OS=Canis lupus familiaris GN=SACM1L PE=4 SV=2	202.9	226.8	302.1	276.7	288.3	290	314.6
F1PJJ0	Uncharacterized protein OS=Canis lupus familiaris GN=RABEP2 PE=4 SV=2	596.3	319.7	341.3	389.3	359.6	345.2	333.1
F1PJL8	Uncharacterized protein OS=Canis lupus familiaris GN=MBP PE=4 SV=2	3167.7	12333.1	2117.5	2257.8	1734.8	1799.2	1896.9
F1PJL9	Uncharacterized protein OS=Canis lupus familiaris GN=MBP PE=4 SV=1	2265	19348.9	1159.3	1099.3	1173.5	965.6	1384.9
F1PJM1	Uncharacterized protein OS=Canis lupus familiaris GN=FBLN5 PE=4 SV=2	110.7	97.8	387.2	292.2	356.8	136.1	430.8
F1PJM9	Phospholipid-transporting ATPase OS=Canis lupus familiaris GN=ATP9B PE=3 SV=2	178.7	121.6	105.7	112.4	134.6	112.4	107.5
F1PJP0	Uncharacterized protein OS=Canis lupus familiaris GN=ENPP1 PE=4 SV=2	83.3	62.3	170.5	221	212.4	188.3	211.1
F1PJP5	Dolichyl-diphosphooligosaccharide--protein glycosyltransferase subunit STT3A OS=Canis lupus familiaris GN=STT3A PE=1 SV=3	265.6	207.9	355.7	376.2	417.9	558.1	362.8
F1PJS0	Uncharacterized protein OS=Canis lupus familiaris GN=GRHPR PE=3 SV=1	338.1	313.4	170.5	203.9	193.3	199.6	175.6
F1PJT2	Uncharacterized protein OS=Canis lupus familiaris GN=TRIM28 PE=4 SV=2	163.7	167.5	307.2	299.8	346.6	250.1	389.2
F1PJV5	Uncharacterized protein OS=Canis lupus familiaris GN=ADK PE=4 SV=2	788.9	714.5	599.3	649.1	586.3	502.7	712.4
F1PK00	Uncharacterized protein OS=Canis lupus familiaris GN=LOC609452 PE=4 SV=2	292.2	433.3	315	314.6	299.3	297.4	284.8
F1PK01	Uncharacterized protein OS=Canis lupus familiaris GN=DPYSL5 PE=4 SV=2	1506	1177.8	507.7	514.7	511	496.9	490.3
F1PK29	Uncharacterized protein OS=Canis lupus familiaris GN=RNH1 PE=4 SV=2	527.9	497.9	499.8	626.8	536.3	565.1	548.4
F1PK40	Uncharacterized protein OS=Canis lupus familiaris GN=OGDHL PE=4 SV=2	319.5	555.8	346	352.4	358.5	402.9	424.4
F1PK43	Uncharacterized protein OS=Canis lupus familiaris GN=AKR1A1 PE=4 SV=2	496.4	549.4	330.4	385.2	366.6	389	383.2
F1PK58	Uncharacterized protein OS=Canis lupus familiaris GN=OLFML1 PE=4 SV=2	119.1	109.3	486.9	561.8	529.6	323.1	470.9
F1PK63	Uncharacterized protein OS=Canis lupus familiaris GN=IFI30 PE=4 SV=2	292.4	245.5	272.5	287.1	282.7	459.2	286.3
F1PK66	Uncharacterized protein OS=Canis lupus familiaris GN=ECE1 PE=4 SV=2	599.4	531	514.4	475.7	596.4	492.9	597.3
F1PK90	Uncharacterized protein OS=Canis lupus familiaris GN=DDX46 PE=4 SV=2	222.2	76.2	126.3	189.2	184.6	229.6	145.3
F1PK93	Uncharacterized protein OS=Canis lupus familiaris PE=3 SV=2	261.8	252	138.9	139.1	160	147.8	153
F1PKB2	Alpha-mannosidase OS=Canis lupus familiaris GN=MAN2B1 PE=3 SV=2	624.3	338.7	574.4	650.1	602.8	653.4	611.7
F1PKC1	Uncharacterized protein OS=Canis lupus familiaris GN=ATRX PE=4 SV=2	159.1	99.6	193.6	177.2	201.4	185.2	190.3
F1PKF1	Uncharacterized protein OS=Canis lupus familiaris GN=TMEM30A PE=4 SV=2	229.2	149.4	155.2	183.5	159.3	225.4	173.8
F1PKF6	Uncharacterized protein OS=Canis lupus familiaris GN=SF3B1 PE=4 SV=2	343.9	213.2	303.6	320.1	323.9	383	305.5
F1PKR6	Uncharacterized protein OS=Canis lupus familiaris GN=RPS16 PE=3 SV=2	235.3	231.6	277.4	264.1	292.9	305.4	277.1
F1PKR9	Uncharacterized protein OS=Canis lupus familiaris GN=MYBBP1A PE=4 SV=2	542.9	403.2	446	492.7	483	594.2	452.3
F1PKS3	ATP-dependent 6-phosphofructokinase OS=Canis lupus familiaris GN=PFKP PE=3 SV=2	263.5	340.4	130.1	136.2	140	141.3	163.8
F1PKS7	Phospholemman OS=Canis lupus familiaris GN=FXYD1 PE=4 SV=2	350.6	205	242.7	262.6	283.7	265.9	271.5
F1PKU7	Protein kinase C OS=Canis lupus familiaris GN=PRKCB PE=3 SV=2	372.8	355.1	176.9	208.2	194.9	255.1	188.9
F1PKV2	Uncharacterized protein OS=Canis lupus familiaris GN=CARM1 PE=3 SV=2	79.7	45.5	70.8	90.3	71.7	75.9	61.2
F1PKW3	Uncharacterized protein OS=Canis lupus familiaris GN=SPARCL1 PE=3 SV=2	151.8	182.8	184.4	242.5	236.9	216.8	330.9
F1PKW7	Uncharacterized protein OS=Canis lupus familiaris GN=YWHAB PE=3 SV=2	2531.9	2474	1393.6	1506.7	1431.5	1436.8	1697.8
F1PKX2	Uncharacterized protein OS=Canis lupus familiaris GN=ABI3BP PE=4 SV=2	164.2	146.9	370.3	287.7	256.3	291.4	300.9
F1PKX3	Uncharacterized protein OS=Canis lupus familiaris GN=F13A1 PE=4 SV=2	302.8	277.7	604.8	614	454.9	373	505.2
F1PKY3	Uncharacterized protein OS=Canis lupus familiaris GN=ADA PE=3 SV=2	350.2	334.5	418.1	406.6	459.5	516.7	473
F1PKY9	Uncharacterized protein OS=Canis lupus familiaris GN=MTDH PE=4 SV=2	101.3	35.6	114.7	130.7	120.1	142.1	95.9
F1PL45	Uncharacterized protein OS=Canis lupus familiaris PE=4 SV=2	153.7	68.4	86	98.9	113.7	80.3	261.4
F1PL53	Sodium/potassium-transporting ATPase subunit alpha OS=Canis lupus familiaris GN=ATP1A2 PE=3 SV=2	1142.5	1910.1	457.8	437.8	449.2	455.8	539.3
F1PL60	Scavenger receptor cysteine-rich type 1 protein M130 OS=Canis lupus familiaris GN=CD163 PE=4 SV=2	336.4	293.6	489.7	599.7	502.1	615.1	489.2
F1PL63	Fructose-bisphosphate aldolase OS=Canis lupus familiaris GN=ALDOC PE=3 SV=1	3709.2	3543.7	1025.3	1102.2	1070.1	1131.4	1119
F1PL91	Uncharacterized protein OS=Canis lupus familiaris GN=RFTN1 PE=4 SV=2	279	269.3	312.8	301.8	332.3	312.3	353.3
F1PL93	Uncharacterized protein OS=Canis lupus familiaris GN=ARHGDIA PE=4 SV=2	1088.4	936.8	546.3	562.6	555.2	548.8	577
F1PL97	Protein disulfide-isomerase OS=Canis lupus familiaris GN=P4HB PE=3 SV=2	1627.8	1418.8	2419.2	2900.1	2597.3	3032.4	2913.7
F1PLA1	Uncharacterized protein OS=Canis lupus familiaris GN=LTBP1 PE=4 SV=2	77.9	89.5	358.9	347.3	311	199.7	262
F1PLC0	Uncharacterized protein OS=Canis lupus familiaris GN=ACSS3 PE=4 SV=2	139.6	105.9	132.7	175	180.4	253	163.8
F1PLD5	Uncharacterized protein OS=Canis lupus familiaris GN=KHDRBS1 PE=4 SV=2	132.3	72	177.7	193.3	191.9	169.8	199.4
F1PLD6	Uncharacterized protein OS=Canis lupus familiaris GN=TNNI1 PE=4 SV=2	446.8	212.5	427.5	377.2	382	2855.3	355.8
F1PLD8	Uncharacterized protein OS=Canis lupus familiaris PE=4 SV=2	190.1	278.6	226.8	291.2	253.6	292.7	278.5
F1PLG2	Uncharacterized protein OS=Canis lupus familiaris GN=NNT PE=4 SV=2	875.2	1131.4	579.8	582.6	617.8	1070.5	611.5
F1PLG7	Uncharacterized protein OS=Canis lupus familiaris GN=MYO1F PE=3 SV=2	317.5	175.7	223.4	276.9	274.6	329.7	161.4
F1PLG8	Uncharacterized protein OS=Canis lupus familiaris GN=ACADS PE=3 SV=2	241.5	221.5	222.6	224.1	252.4	251	236.6
F1PLJ9	Uncharacterized protein OS=Canis lupus familiaris GN=IARS PE=3 SV=2	516.9	261.1	323.1	391.9	379.4	475.2	358
F1PLL6	Uncharacterized protein OS=Canis lupus familiaris GN=CRLF3 PE=4 SV=2	230	143.6	164.9	170.9	153.9	192.6	109.5
F1PLM5	S-(hydroxymethyl)glutathione dehydrogenase OS=Canis lupus familiaris PE=3 SV=2	365.7	319.5	123.7	154.2	175.4	156.1	205.4
F1PLN2	Uncharacterized protein OS=Canis lupus familiaris GN=RPL3 PE=3 SV=1	425.2	333.1	225.1	175	238	233.7	301.7
F1PLN5	Uncharacterized protein OS=Canis lupus familiaris GN=FMOD PE=4 SV=2	344.9	297	1263.7	1183.9	1070.1	531.6	1228.2
F1PLP2	Cytochrome b-c1 complex subunit 7 OS=Canis lupus familiaris GN=LOC477944 PE=3 SV=2	216.1	841.1	233.5	238	284.7	310.7	277.4
F1PLP3	Tetraspanin OS=Canis lupus familiaris GN=CD82 PE=3 SV=2	65.9	59.1	166	178	194.5	154.4	179.9
F1PLQ3	Uncharacterized protein OS=Canis lupus familiaris GN=CYP20A1 PE=4 SV=2	605.7	224.9	504.5	624.2	603.3	608.9	599.1
F1PLR0	Uncharacterized protein OS=Canis lupus familiaris GN=RACK1 PE=4 SV=2	362.9	475.1	484.3	468.6	520	512.4	543.4
F1PLS0	Uncharacterized protein OS=Canis lupus familiaris GN=SCFD1 PE=3 SV=2	297.2	186.9	436.1	364.4	386.7	415.6	402.7
F1PLS4	Uncharacterized protein OS=Canis lupus familiaris GN=VIM PE=3 SV=1	3470	4044	7057.2	8596.9	8204.3	6421.1	9813.6
F1PLU5	Uncharacterized protein OS=Canis lupus familiaris GN=PFDN2 PE=4 SV=2	257.2	524.1	342.8	451.9	449.2	456.2	495.7
F1PLV2	Peptidyl-prolyl cis-trans isomerase OS=Canis lupus familiaris GN=PPIB PE=3 SV=2	909.5	756.6	926.7	905.2	952	970.8	952.4
F1PLV6	Fibulin-1 OS=Canis lupus familiaris GN=FBLN1 PE=3 SV=2	563.2	478.1	1401	1772.6	1571	1064.7	1758.6
F1PLV8	Uncharacterized protein OS=Canis lupus familiaris GN=MMP16 PE=3 SV=2	329.4	829.1	296.1	333.4	433.8	422.3	411.5
F1PLW6	Uncharacterized protein OS=Canis lupus familiaris GN=OAS1 PE=4 SV=2	202.9	166.7	141.3	143.6	158.9	134.8	162
F1PLY9	Uncharacterized protein OS=Canis lupus familiaris GN=LOC102155424 PE=3 SV=2	171.5	136.2	179.7	197.8	194.2	198.2	172.6
F1PM26	Uncharacterized protein OS=Canis lupus familiaris GN=CD109 PE=4 SV=2	104.8	138.8	269.1	354	299.8	232.3	379.4
F1PM36	Uncharacterized protein OS=Canis lupus familiaris GN=GSPT1 PE=4 SV=2	387.7	344.7	292.2	351.3	304.6	329.9	279.3
F1PM56	Uncharacterized protein OS=Canis lupus familiaris GN=CPT1A PE=3 SV=1	320.8	271.3	400.9	434.3	392.8	403	311
F1PM84	Uncharacterized protein OS=Canis lupus familiaris GN=GGA2 PE=4 SV=2	218	195.7	131.7	149.3	150.5	199.8	137.5
F1PM93	Uncharacterized protein OS=Canis lupus familiaris GN=SEPT6 PE=3 SV=2	328.8	225.2	336.2	315.1	348.5	373.3	327.4
F1PMA6	Uncharacterized protein OS=Canis lupus familiaris GN=EIF5B PE=4 SV=2	114.9	125.5	149.6	151.9	148.4	176.1	114.8
F1PMB5	Uncharacterized protein OS=Canis lupus familiaris GN=SNX2 PE=4 SV=2	253.1	189.1	359.6	375.6	381	367.2	448.6
F1PMC5	Uncharacterized protein OS=Canis lupus familiaris GN=PI4KA PE=3 SV=2	250.1	176.1	203.9	222.3	231.9	213.2	182.6
F1PME4	Uncharacterized protein OS=Canis lupus familiaris GN=DNAJC3 PE=4 SV=2	438.3	305.4	321.6	327.3	395.9	398.6	377.5
F1PMF0	Sodium/potassium-transporting ATPase subunit beta OS=Canis lupus familiaris GN=ATP1B1 PE=3 SV=2	706	1095.2	114.3	101.8	111.7	93	126.6
F1PMG8	Uncharacterized protein OS=Canis lupus familiaris GN=COLGALT1 PE=4 SV=2	196.4	197.3	313.3	312.8	308.9	360.2	287.5
F1PMI5	Uncharacterized protein OS=Canis lupus familiaris GN=CCDC88C PE=4 SV=2	262.9	218.2	115.8	136.2	124	129.5	121.4
F1PMK4	Uncharacterized protein OS=Canis lupus familiaris GN=SLC39A14 PE=4 SV=1	205.8	173	257.3	333.6	305.9	458.1	240.1
F1PMK7	Uncharacterized protein OS=Canis lupus familiaris GN=MMP2 PE=3 SV=2	98.7	358.6	269.7	371.7	302.7	223	502
F1PML1	Uncharacterized protein OS=Canis lupus familiaris GN=LOC480571 PE=3 SV=2	1478.2	1345.4	547.6	561.4	584.3	668.9	522.4
F1PML6	Uncharacterized protein OS=Canis lupus familiaris GN=ECI2 PE=4 SV=2	283.7	223.6	271.4	309.7	290	322.8	243.6
F1PMM8	Uncharacterized protein OS=Canis lupus familiaris GN=EXOC4 PE=1 SV=2	149.2	126.2	116.4	126	139.7	144.1	123.6
F1PMN2	Mitogen-activated protein kinase OS=Canis lupus familiaris GN=MAPK10 PE=4 SV=2	457.4	282.9	275.5	399.9	244.9	314.6	223.3
F1PMP0	Tetraspanin OS=Canis lupus familiaris GN=TSPAN6 PE=3 SV=1	150.9	114.9	284.7	342.2	332.4	237	404.1
F1PMU4	Uncharacterized protein OS=Canis lupus familiaris GN=NCAM1 PE=4 SV=2	2010.2	2225.5	847.8	849.1	895	965.1	1000.8
F1PMV5	Uncharacterized protein OS=Canis lupus familiaris GN=KLHL41 PE=4 SV=2	162.8	180.5	261.8	201.9	207.3	1122.8	210.6
F1PN11	Histone deacetylase OS=Canis lupus familiaris GN=HDAC6 PE=4 SV=2	160.2	138.2	116.8	148.5	173.5	171.6	137.2
F1PN20	Uncharacterized protein OS=Canis lupus familiaris GN=LRRC15 PE=4 SV=2	68.7	59.7	114.1	197.6	124.2	113.6	124.8
F1PN25	Uncharacterized protein OS=Canis lupus familiaris GN=NQO2 PE=4 SV=2	231.2	343.4	161.4	201.3	206.5	311.6	212.1
F1PN38	Uncharacterized protein OS=Canis lupus familiaris GN=BIRC6 PE=3 SV=2	60.1	38.3	31.9	30.8	34	50.7	37.1
F1PN67	Uncharacterized protein OS=Canis lupus familiaris GN=MAP1S PE=4 SV=2	43.4	85.3	48	41.4	84.2	61.9	68.6
F1PN69	Uncharacterized protein OS=Canis lupus familiaris GN=PGRMC2 PE=3 SV=2	99.7	98.9	121.3	104.6	118.1	142.6	139.5
F1PN76	Uncharacterized protein OS=Canis lupus familiaris GN=ANKFY1 PE=4 SV=2	644.7	382.1	444.9	690	581.1	596.7	563.4
F1PN96	Uncharacterized protein OS=Canis lupus familiaris GN=DNAJB2 PE=4 SV=2	185.6	340	244.9	366	267.2	330.9	313.5
F1PN98	Uncharacterized protein OS=Canis lupus familiaris GN=F5 PE=3 SV=2	113.8	78.5	399.2	295.1	313	229.6	240.4
F1PNC0	Serine/threonine-protein phosphatase OS=Canis lupus familiaris GN=PPP3CA PE=3 SV=2	446.4	380.3	232.6	288.5	273.7	271	287
F1PNF3	Uncharacterized protein OS=Canis lupus familiaris GN=EIF4G1 PE=4 SV=2	1163.3	709.7	824.8	901.3	927.2	1112.9	856.1
F1PNF4	Uncharacterized protein OS=Canis lupus familiaris GN=CPXM2 PE=4 SV=2	203.1	182.2	528.7	709.6	542.5	249.4	526.7
F1PNG1	Uncharacterized protein OS=Canis lupus familiaris GN=BUB3 PE=4 SV=2	172.1	147.8	189.3	201.5	192	192.8	182.7
F1PNG7	Uncharacterized protein OS=Canis lupus familiaris GN=C1R PE=3 SV=2	312.1	264.6	582.5	563	502.8	473.9	504.9
F1PNH6	Uncharacterized protein OS=Canis lupus familiaris GN=SELENBP1 PE=4 SV=2	606.3	464.9	781.7	842.8	877	659.1	708.9
F1PNI3	Uncharacterized protein OS=Canis lupus familiaris PE=4 SV=2	828	708	561.5	528.5	633.2	528	570.7
F1PNJ5	Uncharacterized protein OS=Canis lupus familiaris GN=CISD1 PE=4 SV=2	657.2	806.7	416.8	381.3	438.8	446	498.6
F1PNK7	Uncharacterized protein OS=Canis lupus familiaris GN=PLXDC2 PE=4 SV=2	278.9	161.9	253.2	336.9	301	283.9	352
F1PNM2	Protein transport protein Sec61 subunit alpha isoform 1 OS=Canis lupus familiaris GN=SEC61A1 PE=3 SV=2	359.5	194.4	363.6	418.4	431.5	694.6	355.2
F1PNP7	Uncharacterized protein OS=Canis lupus familiaris GN=EHD2 PE=3 SV=2	59.3	39.9	66.2	59.7	68.6	49.6	45.2
F1PNR5	Uncharacterized protein OS=Canis lupus familiaris GN=CYP4V2 PE=3 SV=2	147.8	128.1	142.6	162.9	196	290.9	149.1
F1PNS4	Uncharacterized protein OS=Canis lupus familiaris GN=STAM2 PE=4 SV=2	113.9	139.8	103.1	126.2	108.3	95	135
F1PNS6	Uncharacterized protein OS=Canis lupus familiaris GN=PEPD PE=3 SV=2	575.5	427	466.1	610.5	497.3	627.3	583.9
F1PNS9	Uncharacterized protein OS=Canis lupus familiaris GN=GHDC PE=4 SV=2	95.9	69.2	74.2	79.3	98.1	103.7	66.8
F1PNT0	Uncharacterized protein OS=Canis lupus familiaris GN=LSAMP PE=4 SV=2	273.7	355.6	74	66.1	96	59.2	97.6
F1PNV5	Prekallikrein OS=Canis lupus familiaris GN=KLKB1 PE=2 SV=2	283.4	168.5	554.7	587.5	478.6	493.4	483.1
F1PNV8	Uncharacterized protein OS=Canis lupus familiaris GN=RABEP1 PE=4 SV=2	134.6	163	118.6	141.3	149.5	126.5	135.1
F1PNX1	Uncharacterized protein OS=Canis lupus familiaris GN=NPLOC4 PE=4 SV=2	228.5	160	183.7	212.9	221.9	195.3	185.1
F1PNX5	Reticulon OS=Canis lupus familiaris GN=RTN1 PE=4 SV=1	298.9	207.5	146	141.3	183.3	165.3	153.5
F1PNY0	Uncharacterized protein OS=Canis lupus familiaris GN=INPPL1 PE=4 SV=2	128.5	96.7	112.3	109.9	124.6	115.6	78.5
F1PNY2	Uncharacterized protein OS=Canis lupus familiaris PE=4 SV=2	209.9	220	578.3	540	484.3	337.4	552.6
F1PP11	Uncharacterized protein OS=Canis lupus familiaris GN=FBN3 PE=4 SV=2	50.6	72.8	289.5	257.8	220.8	147.6	196.4
F1PP29	Uncharacterized protein OS=Canis lupus familiaris GN=IGHE PE=4 SV=1	114.3	71.9	517.1	669.9	412.4	312.1	135.5
F1PP35	Uncharacterized protein OS=Canis lupus familiaris GN=ALDH5A1 PE=4 SV=2	753.5	816.3	186.5	208.6	195.7	180.7	202.7
F1PP40	Uncharacterized protein OS=Canis lupus familiaris GN=CRIP2 PE=4 SV=2	99.1	252.7	177.1	106.9	154	86	197.6
F1PP42	Uncharacterized protein OS=Canis lupus familiaris GN=MTA1 PE=4 SV=2	274.2	234.2	382.9	394.8	415.1	443.6	407.2
F1PP57	Uncharacterized protein OS=Canis lupus familiaris GN=NDUFA4 PE=4 SV=2	604.2	659.8	364.3	306.1	334.8	603.3	364.3
F1PP63	Uncharacterized protein OS=Canis lupus familiaris GN=ACADSB PE=3 SV=2	278.6	239.8	120.9	148.5	144.5	165.5	165.4
F1PP71	Uncharacterized protein OS=Canis lupus familiaris GN=F11R PE=4 SV=2	183.2	179.5	384.2	539.8	395.6	293.6	537.9
F1PP76	Mitogen-activated protein kinase kinase kinase kinase OS=Canis lupus familiaris GN=MAP4K2 PE=3 SV=2	161.8	119.9	43.3	44.7	41.3	44.5	34
F1PP89	Uncharacterized protein OS=Canis lupus familiaris PE=4 SV=2	118.2	90.3	124.6	165.2	168.6	133.7	178.2
F1PP91	Uncharacterized protein OS=Canis lupus familiaris GN=DNAJA4 PE=3 SV=1	261	226.9	94.1	105.8	109.9	182.1	130.4
F1PPA0	Uncharacterized protein OS=Canis lupus familiaris PE=4 SV=2	53.7	55.3	90.1	94.4	88	74.2	91.4
F1PPA1	Uncharacterized protein OS=Canis lupus familiaris GN=GPC1 PE=3 SV=1	141.6	104.4	216.6	202.1	224.8	162.3	235.5
F1PPC7	Succinate--CoA ligase [ADP-forming] subunit beta, mitochondrial OS=Canis lupus familiaris GN=SUCLA2 PE=3 SV=2	587.4	564.2	317.5	338.5	321.4	458.2	327.4
F1PPC9	Uncharacterized protein OS=Canis lupus familiaris GN=TMEM43 PE=4 SV=1	325.3	269.3	423.4	475.5	497.1	563.3	381.8
F1PPF5	Uncharacterized protein OS=Canis lupus familiaris GN=ATPAF1 PE=4 SV=2	152.3	162.4	109.6	135.2	121.5	116.6	164.5
F1PPF7	Uncharacterized protein OS=Canis lupus familiaris GN=HK1 PE=3 SV=2	1831.8	1993.3	975.3	961.7	974.7	971.8	989.1
F1PPG5	Integrin beta OS=Canis lupus familiaris GN=ITGB3 PE=3 SV=1	367.2	267.9	748.7	718.6	695.1	535.4	666.5
F1PPH7	Uncharacterized protein OS=Canis lupus familiaris GN=PSMC2 PE=3 SV=2	355.4	374	366.6	393.6	378	377.1	341.4
F1PPH9	Uncharacterized protein OS=Canis lupus familiaris GN=MKNK1 PE=3 SV=2	139.1	247	77	78.5	94.5	71.1	75.2
F1PPJ1	Uncharacterized protein OS=Canis lupus familiaris GN=PIP4K2A PE=4 SV=2	636.9	411.8	315.2	298.7	284.7	294.3	286.8
F1PPK3	Solute carrier family 2, facilitated glucose transporter member 3 OS=Canis lupus familiaris GN=SLC2A3 PE=3 SV=1	48.8	68.5	79.3	91.6	78.9	109.4	56
F1PPK8	Uncharacterized protein OS=Canis lupus familiaris GN=F11 PE=3 SV=2	157.8	131.8	280.7	260	212.3	224.6	200.1
F1PPL5	Uncharacterized protein OS=Canis lupus familiaris GN=FLOT2 PE=4 SV=1	408.7	327.7	593	602.8	541.2	536.5	460.5
F1PPL6	Uncharacterized protein OS=Canis lupus familiaris GN=RAP2C PE=4 SV=2	276.3	283.4	188.2	246.5	232.8	239.4	176.6
F1PPL9	Uncharacterized protein OS=Canis lupus familiaris GN=C1QTNF3 PE=4 SV=2	246.4	251.6	535.8	593.2	556	479.8	822.2
F1PPM7	Uncharacterized protein OS=Canis lupus familiaris GN=RAI14 PE=4 SV=2	439	303	490.1	706.6	603.9	575.7	479.8
F1PPP4	Uncharacterized protein OS=Canis lupus familiaris PE=4 SV=2	320.3	151.4	155.9	162.5	158.7	168.1	132.7
F1PPR0	Eukaryotic translation initiation factor 3 subunit I OS=Canis lupus familiaris GN=EIF3I PE=3 SV=1	158.9	177.7	235.2	213.5	202	277	183
F1PPR1	Uncharacterized protein OS=Canis lupus familiaris GN=NAA50 PE=4 SV=2	249.2	180.5	207.8	217.8	190.6	200.8	209.9
F1PPR8	Uncharacterized protein OS=Canis lupus familiaris GN=ASL PE=3 SV=2	511.1	580.2	262	298.7	259.7	300.3	239.6
F1PPT2	Uncharacterized protein OS=Canis lupus familiaris GN=KIF21A PE=3 SV=2	533.4	574.6	229.6	216.6	222.4	178.9	240.4
F1PPT7	Uncharacterized protein OS=Canis lupus familiaris GN=PAICS PE=3 SV=2	259.2	202.5	178.2	166.8	177.8	164.2	169.4
F1PPY4	Uncharacterized protein OS=Canis lupus familiaris GN=PLAU PE=3 SV=2	71.6	31.4	55.8	84.4	71.7	86.1	72.4
F1PPZ2	Ribonuclease A B1 OS=Canis lupus familiaris GN=RNASE4 PE=3 SV=2	75.4	69.1	311.1	257.3	282.1	146.9	584.9
F1PPZ6	Uncharacterized protein OS=Canis lupus familiaris GN=UXT PE=4 SV=2	1571.6	120.5	102.7	133.2	117.7	140.7	79.1
F1PPZ7	Uncharacterized protein OS=Canis lupus familiaris GN=LOC478210 PE=4 SV=2	580.2	497.7	331.5	328.5	352.3	349.5	318.5
F1PQ10	Uncharacterized protein OS=Canis lupus familiaris GN=ITM2B PE=4 SV=2	403.3	375	312.6	295.3	303.6	322.4	302.9
F1PQ35	Malic enzyme OS=Canis lupus familiaris GN=ME3 PE=3 SV=2	476.5	404.7	206.9	242.7	224.3	270.6	229.9
F1PQ40	Uncharacterized protein OS=Canis lupus familiaris GN=PSMC1 PE=3 SV=2	219.9	188.6	228.8	219.8	223.5	198	206.8
F1PQ43	Acidic leucine-rich nuclear phosphoprotein 32 family member A OS=Canis lupus familiaris GN=ANP32A PE=4 SV=2	85.1	50.7	90.9	98.3	105.5	96.2	82.6
F1PQ45	Uncharacterized protein OS=Canis lupus familiaris GN=ITGA11 PE=3 SV=2	157.6	77.4	151	196.6	150	154.9	130.2
F1PQ52	Uncharacterized protein OS=Canis lupus familiaris GN=MPO PE=4 SV=2	617.9	520.8	1108.7	1358.1	1106.2	1355.1	796.3
F1PQ68	Tubulin beta chain OS=Canis lupus familiaris GN=TUBB2B PE=3 SV=2	791.7	1300	517.8	446	396	334.1	406.5
F1PQ79	Uncharacterized protein OS=Canis lupus familiaris GN=AP2M1 PE=3 SV=1	481.2	496.4	284.9	319.5	330.1	298	292.6
F1PQ80	Uncharacterized protein OS=Canis lupus familiaris GN=SEC23IP PE=4 SV=2	252.6	139.6	255.1	266.9	267.1	278.8	258.6
F1PQ85	Uncharacterized protein OS=Canis lupus familiaris GN=MASP1 PE=3 SV=2	87.4	64.4	241.8	191.3	175.8	170.8	159.8
F1PQ88	Uncharacterized protein OS=Canis lupus familiaris GN=NEBL PE=4 SV=2	226.6	646.6	134.7	136.8	188.8	134.4	183.1
F1PQ89	Uncharacterized protein OS=Canis lupus familiaris GN=EEFSEC PE=4 SV=2	116.6	143.9	86.8	84	80	88.8	60.1
F1PQA0	Uncharacterized protein OS=Canis lupus familiaris GN=ENDOD1 PE=4 SV=2	66.8	27.6	43.9	55.9	51.7	58.4	38.4
F1PQA2	Uncharacterized protein OS=Canis lupus familiaris GN=MATN2 PE=4 SV=2	228.8	212.9	387.9	312.8	381.7	339.5	376.2
F1PQC5	Uncharacterized protein OS=Canis lupus familiaris GN=DYSF PE=4 SV=2	182.5	193.2	124.6	132.1	144.7	229.2	116.1
F1PQD3	Uncharacterized protein OS=Canis lupus familiaris GN=TTLL12 PE=4 SV=2	222	232.1	214.6	204.5	218.9	195.5	179.2
F1PQD4	Uncharacterized protein OS=Canis lupus familiaris PE=3 SV=2	864.7	812.9	395.2	457.8	422.1	389.1	467.5
F1PQD9	Uncharacterized protein OS=Canis lupus familiaris GN=SCUBE1 PE=4 SV=1	56.5	72.6	50.6	65.1	48	36.1	53.3
F1PQG3	Uncharacterized protein OS=Canis lupus familiaris PE=4 SV=2	149.2	132.1	179.7	165.2	212.7	199.6	228.2
F1PQM1	Purine nucleoside phosphorylase OS=Canis lupus familiaris GN=PNP PE=3 SV=2	1127	1253.5	530.7	573.4	567.1	607	580.4
F1PQM2	Uncharacterized protein OS=Canis lupus familiaris GN=ARRB1 PE=4 SV=1	413.2	525.6	239.7	238.8	245.5	237.6	234.1
F1PQM7	Tetraspanin OS=Canis lupus familiaris GN=CD9 PE=3 SV=2	690.5	462.8	539.2	460.4	383.4	204.9	843.2
F1PQN3	Uncharacterized protein OS=Canis lupus familiaris GN=FBL PE=3 SV=2	123.5	85.5	134.7	121.5	163.1	148.5	128
F1PQN5	Uncharacterized protein OS=Canis lupus familiaris GN=CFL1 PE=3 SV=2	660.8	2328.6	655.4	544.9	734.7	514.8	885.9
F1PQQ3	Uncharacterized protein OS=Canis lupus familiaris GN=HOOK3 PE=4 SV=2	651.7	427.2	483.3	457.6	472.9	503.4	450.9
F1PQS2	Metalloproteinase inhibitor 1 OS=Canis lupus familiaris GN=TIMP1 PE=4 SV=2	110.6	129.6	155.9	203.5	189.1	186.2	149.7
F1PQS3	Uncharacterized protein OS=Canis lupus familiaris GN=CAPZB PE=4 SV=2	899.5	792.8	705.6	908.6	829.5	965.7	817
F1PQS8	Uncharacterized protein OS=Canis lupus familiaris GN=CMTM6 PE=4 SV=2	558.8	223.6	372.6	339.1	377.1	380.5	340.5
F1PQT9	Synapsin-1 OS=Canis lupus familiaris GN=SYN1 PE=4 SV=2	449.6	500.7	168.5	209.6	174.9	176.1	178.2
F1PQU2	Uncharacterized protein OS=Canis lupus familiaris GN=PITRM1 PE=4 SV=2	300.1	188.9	218.7	291.4	263.7	338	222.3
F1PQU5	Uncharacterized protein OS=Canis lupus familiaris GN=SV2C PE=4 SV=2	290.8	320.4	74.2	58.7	67	47.1	64.3
F1PQV4	Uncharacterized protein OS=Canis lupus familiaris GN=OLFML3 PE=4 SV=2	134.5	151.2	560.3	555.7	500.5	230.7	617.1
F1PQZ7	Protein argonaute-2 OS=Canis lupus familiaris GN=AGO2 PE=3 SV=2	297.9	216	482.2	583	482.8	513.5	456
F1PR26	Uncharacterized protein OS=Canis lupus familiaris GN=PTGFRN PE=4 SV=2	416	270.6	470	536.7	481.7	382.2	542
F1PR34	Uncharacterized protein OS=Canis lupus familiaris GN=AP1S2 PE=4 SV=2	112.7	84.1	52.5	78.5	74.5	147	93.4
F1PR36	Uncharacterized protein OS=Canis lupus familiaris GN=SRPK2 PE=4 SV=2	65.6	40.7	54.7	68.5	61.8	161.8	50.4
F1PR39	Uncharacterized protein OS=Canis lupus familiaris GN=COL6A3 PE=4 SV=2	80	89.3	317.8	208.8	288.4	232.8	309
F1PR47	DNA helicase OS=Canis lupus familiaris GN=MCM2 PE=3 SV=2	247.8	198.4	214.4	244.5	262.3	420.8	201.8
F1PR54	Uncharacterized protein OS=Canis lupus familiaris GN=LTF PE=3 SV=1	1589.7	1446.5	3601.2	4428.8	3621.9	4449	2569.2
F1PR63	Histone deacetylase OS=Canis lupus familiaris GN=HDAC2 PE=3 SV=2	413.3	584.2	275.3	279.4	349.4	319	365
F1PR66	Uncharacterized protein OS=Canis lupus familiaris GN=LAMA4 PE=4 SV=2	323.3	311.6	593.5	573	686.9	561.5	617.3
F1PR71	Uncharacterized protein OS=Canis lupus familiaris GN=STX2 PE=3 SV=2	195.1	165.9	194.9	198.8	170.3	182.6	213.7
F1PR84	Mitogen-activated protein kinase OS=Canis lupus familiaris PE=4 SV=2	407.6	461.8	224.9	222.1	212.9	180.3	232.7
F1PR87	Uncharacterized protein OS=Canis lupus familiaris GN=PLEKHO2 PE=4 SV=2	266.1	370.7	344.6	403.1	376.9	401.1	310.3
F1PR93	WD repeat domain 1 OS=Canis lupus familiaris GN=WDR1 PE=2 SV=2	917	968.4	761.2	783.2	817.5	847.1	828.8
F1PR95	Uncharacterized protein OS=Canis lupus familiaris GN=C1QBP PE=4 SV=2	1003.5	1007.2	392.8	505.9	473.1	577.3	631.8
F1PRC5	Uncharacterized protein OS=Canis lupus familiaris GN=SLC3A2 PE=4 SV=2	463.3	753	353.3	298.1	355	280.5	444.7
F1PRC8	Uncharacterized protein OS=Canis lupus familiaris GN=ANK1 PE=4 SV=2	1108.7	674.6	2207.5	1727	1565.8	1161.3	1310.6
F1PRE1	Uncharacterized protein OS=Canis lupus familiaris GN=NAP1L1 PE=3 SV=2	170.3	361.3	408.5	387	372.7	337	533.2
F1PRE3	Uncharacterized protein OS=Canis lupus familiaris GN=CHMP6 PE=4 SV=2	181.9	160	120.1	133.2	142.8	133.2	138.8
F1PRF8	Uncharacterized protein OS=Canis lupus familiaris GN=PDXDC1 PE=4 SV=2	154.2	95.4	141.7	103.8	135.5	258.7	112.2
F1PRH1	Uncharacterized protein OS=Canis lupus familiaris GN=ABCB6 PE=4 SV=2	47.6	43.4	130.2	117.2	109.8	95.4	111.5
F1PRK0	Uncharacterized protein OS=Canis lupus familiaris GN=PACS2 PE=4 SV=2	98.1	76.7	48.4	59.5	53.6	46.6	53.1
F1PRK3	Uncharacterized protein OS=Canis lupus familiaris PE=4 SV=2	40.4	41.1	84.3	50.4	55.1	98.7	45.4
F1PRL5	Uncharacterized protein OS=Canis lupus familiaris GN=SLC25A5 PE=3 SV=2	1669.7	1428.8	632.7	700.5	689.2	998	665.1
F1PRN2	Uncharacterized protein OS=Canis lupus familiaris GN=MYO1D PE=3 SV=2	473.6	515.3	405	450.9	426.3	378	364.3
F1PRR1	Uncharacterized protein OS=Canis lupus familiaris GN=CALB2 PE=4 SV=1	1077.6	840	153.3	223.3	222.1	163.8	180.5
F1PRR4	Vasodilator-stimulated phosphoprotein OS=Canis lupus familiaris GN=VASP PE=3 SV=1	303.4	420.4	342.4	336.5	383.2	359.8	346.7
F1PRS5	Cation-transporting ATPase OS=Canis lupus familiaris GN=ATP13A1 PE=3 SV=2	60.9	42.8	54.5	66.3	113.7	120.1	54.5
F1PRT4	Coatomer subunit delta OS=Canis lupus familiaris GN=ARCN1 PE=3 SV=2	414.5	380.6	567.3	619.5	626.7	600.5	664.7
F1PRU9	Uncharacterized protein OS=Canis lupus familiaris GN=ITGA2B PE=3 SV=2	257.4	180.9	650.5	709.8	659.7	656.1	557.7
F1PRW0	Uncharacterized protein OS=Canis lupus familiaris GN=PSMD4 PE=4 SV=2	790.8	945.4	490.1	378.1	595.8	523.4	474.8
F1PRW7	Uncharacterized protein OS=Canis lupus familiaris GN=TNPO2 PE=4 SV=1	218.4	193.7	184.4	210	188.4	187.4	223.5
F1PRZ1	Uncharacterized protein OS=Canis lupus familiaris GN=VDAC1 PE=4 SV=2	886.6	2425.4	973.8	821.2	958.7	1006.5	972.7
F1PS11	Uncharacterized protein OS=Canis lupus familiaris GN=PLBD2 PE=4 SV=2	142.4	60.8	110	179.7	132.6	212.7	161.7
F1PS17	Uncharacterized protein OS=Canis lupus familiaris GN=SNTB1 PE=4 SV=2	551.8	203.8	210.6	188	214.7	167.3	345.3
F1PS24	Uncharacterized protein OS=Canis lupus familiaris GN=COL2A1 PE=4 SV=1	387.4	147.8	341.1	389.3	241	192.2	603.2
F1PS26	NADH-cytochrome b5 reductase OS=Canis lupus familiaris GN=CYB5R3 PE=3 SV=2	317.2	302.2	305.1	364.4	372.5	334.7	396.4
F1PS41	Uncharacterized protein OS=Canis lupus familiaris GN=IPO9 PE=4 SV=2	413.6	422.7	364.7	416.4	439.3	388.7	401.7
F1PS57	Uncharacterized protein OS=Canis lupus familiaris GN=P3H1 PE=4 SV=2	393.7	320.7	590.1	659.5	605.1	578.3	750.9
F1PS73	Uncharacterized protein OS=Canis lupus familiaris GN=CSTB PE=4 SV=2	230.8	467.4	185.9	240	235.3	209.3	183.4
F1PS79	NAD kinase 2, mitochondrial OS=Canis lupus familiaris GN=RANBP3L PE=3 SV=2	721.5	651.2	385.1	332.8	310.7	262.6	328.2
F1PS80	Uncharacterized protein OS=Canis lupus familiaris GN=PPP4R1 PE=4 SV=2	256.9	195.3	167.2	178.4	206.1	208.4	152.9
F1PSB1	Uncharacterized protein OS=Canis lupus familiaris GN=SEMA4D PE=3 SV=2	165.9	140.7	94.3	128.7	106.4	135.4	88.1
F1PSB7	Tyrosine-protein kinase OS=Canis lupus familiaris GN=YES1 PE=3 SV=2	110.2	141.4	146.7	152.5	156.4	146.2	170.5
F1PSC1	Uncharacterized protein OS=Canis lupus familiaris GN=MAP4K4 PE=4 SV=2	63.7	29.8	36.4	44.3	31	38.1	55.9
F1PSC2	Uncharacterized protein OS=Canis lupus familiaris GN=TLN1 PE=4 SV=2	2831.3	2538.3	4318.4	4565.1	4585.3	4201.1	4353.4
F1PSC3	Uncharacterized protein OS=Canis lupus familiaris GN=EIF4E PE=3 SV=1	349.3	341.7	254.1	310.4	333.2	360.1	304.8
F1PSC4	ELAV-like protein OS=Canis lupus familiaris GN=ELAVL1 PE=3 SV=2	56.2	127.8	128.9	118.9	150.7	153.8	190.1
F1PSE8	Uncharacterized protein OS=Canis lupus familiaris GN=DYNC1I1 PE=4 SV=2	419.9	457.6	121.3	118.9	159.7	146.2	142.7
F1PSF8	Ammonium transporter Rh type A OS=Canis lupus familiaris GN=RHAG PE=4 SV=2	950	490.9	929	782	838.5	667.2	766.9
F1PSG1	Uncharacterized protein OS=Canis lupus familiaris GN=ERMP1 PE=4 SV=2	178.9	137.3	150.5	139.1	165.9	163	129.1
F1PSG5	Serum paraoxonase/arylesterase 2 OS=Canis lupus familiaris GN=PON2 PE=4 SV=2	149.5	99.1	85.8	81.6	111.2	107.1	116.9
F1PSI7	Uncharacterized protein OS=Canis lupus familiaris GN=SNRPD2 PE=4 SV=2	538.8	374.9	372.9	356	410.2	385.7	548
F1PSK3	Uncharacterized protein OS=Canis lupus familiaris PE=4 SV=2	195.3	280.8	326.8	379.1	342.3	298	406.3
F1PSK6	Uncharacterized protein OS=Canis lupus familiaris GN=EHD1 PE=3 SV=2	469.8	209.3	289.5	329.1	304.5	264.7	270.1
F1PSM2	Alpha-1,4 glucan phosphorylase OS=Canis lupus familiaris GN=PYGB PE=3 SV=2	1095.5	1100.5	519.3	596.5	553.6	507.9	601.4
F1PSP6	Carboxypeptidase OS=Canis lupus familiaris GN=SCPEP1 PE=3 SV=2	337.8	230.8	245.3	324.4	291.4	366.1	267.4
F1PSQ0	Uncharacterized protein OS=Canis lupus familiaris GN=IQGAP2 PE=4 SV=2	697.5	713	665.9	649.7	731.3	593.6	594.4
F1PSQ4	Kinesin-like protein OS=Canis lupus familiaris GN=KIF3A PE=3 SV=1	102.5	69.9	39.7	61	58.1	62.5	47.5
F1PSR6	Uncharacterized protein OS=Canis lupus familiaris GN=DNASE2 PE=4 SV=2	249.5	141.6	678.4	689.2	558	677.2	682.3
F1PSR9	Uncharacterized protein OS=Canis lupus familiaris GN=SAMM50 PE=4 SV=2	588.1	521.6	813.5	750.6	892.7	647.4	756.5
F1PSS2	Uncharacterized protein OS=Canis lupus familiaris GN=THBS4 PE=4 SV=2	673.1	360.2	1526.8	2199.6	1347.4	1959.1	1984.5
F1PSS8	Uncharacterized protein OS=Canis lupus familiaris GN=PROS1 PE=4 SV=2	284	203.2	731.8	703.3	597.1	520.6	577.8
F1PT17	Uncharacterized protein OS=Canis lupus familiaris GN=UCHL3 PE=4 SV=1	286.7	339.1	142.8	112.8	137	122.4	144.5
F1PT94	Uncharacterized protein OS=Canis lupus familiaris GN=MTMR7 PE=3 SV=2	257.2	293	680.1	733.3	650.7	749.8	369.9
F1PT95	Methylthioribulose-1-phosphate dehydratase OS=Canis lupus familiaris GN=APIP PE=3 SV=2	126.7	122.9	75.9	77.3	79.7	87.1	97.9
F1PT97	Uncharacterized protein OS=Canis lupus familiaris PE=4 SV=1	880	761.4	549.3	504.7	512.1	443.9	576.4
F1PTD1	Uncharacterized protein OS=Canis lupus familiaris GN=NIT2 PE=4 SV=2	621	574.9	358.7	340.5	403.6	340.3	425.5
F1PTE0	Uncharacterized protein OS=Canis lupus familiaris GN=SRSF6 PE=4 SV=2	495.6	425.9	338.1	325.7	374.8	545.1	433.8
F1PTE2	Uncharacterized protein OS=Canis lupus familiaris GN=TRIM25 PE=4 SV=2	807.9	498.1	645.6	685	765.6	812.2	708.8
F1PTF0	Uncharacterized protein OS=Canis lupus familiaris GN=GUK1 PE=4 SV=2	257.7	262.8	189.5	206	214.8	183.5	165.8
F1PTG8	Trifunctional purine biosynthetic protein adenosine-3 OS=Canis lupus familiaris GN=LOC100856570 PE=3 SV=2	657.5	682.1	639.4	638.1	601.6	570.8	567.9
F1PTI7	Uncharacterized protein OS=Canis lupus familiaris GN=EPB41L2 PE=4 SV=2	1194.5	1249.1	1058.7	1216.6	1224.3	859.7	1122
F1PTK1	Succinate--CoA ligase [GDP-forming] subunit beta, mitochondrial OS=Canis lupus familiaris GN=SUCLG2 PE=3 SV=2	193.5	153	160.2	175.6	198.4	190.9	168.6
F1PTL1	Uncharacterized protein OS=Canis lupus familiaris GN=RAD23A PE=4 SV=2	442.7	447.1	592	600.1	531.9	547.7	545.2
F1PTP2	Uncharacterized protein OS=Canis lupus familiaris GN=SPR PE=4 SV=2	443	368.8	311.5	328.9	310.6	309.1	283
F1PTP3	Uncharacterized protein OS=Canis lupus familiaris GN=NONO PE=4 SV=2	382.9	331.8	661.4	602.8	641.2	580.1	697.8
F1PTP4	Uncharacterized protein OS=Canis lupus familiaris GN=TAP2 PE=4 SV=2	520	322.7	378	375	443.1	663.3	363.1
F1PTP6	Uncharacterized protein OS=Canis lupus familiaris GN=P4HA2 PE=4 SV=2	341.1	251.4	674.7	625	631.3	628.7	622.1
F1PTR3	Uncharacterized protein OS=Canis lupus familiaris GN=ACSF2 PE=4 SV=2	273	233.9	140.2	155.8	148.8	211.8	219.1
F1PTR5	Uncharacterized protein OS=Canis lupus familiaris GN=ACSL6 PE=4 SV=2	305	336.3	120.9	132.8	124.3	220.4	129.5
F1PTR6	Uncharacterized protein OS=Canis lupus familiaris GN=DLA-DQA1 PE=3 SV=2	443.1	479.2	713.3	678.4	639.3	730.8	595.4
F1PTR7	Uncharacterized protein OS=Canis lupus familiaris GN=OAS2 PE=4 SV=2	436.7	469.8	636.4	536.1	564.7	430.1	632.3
F1PTS5	Uncharacterized protein OS=Canis lupus familiaris GN=XDH PE=4 SV=2	343.7	327.6	442.7	583	481.6	577.2	415.8
F1PTU4	Uncharacterized protein OS=Canis lupus familiaris GN=PCCB PE=4 SV=2	382.5	264	223	196.8	219.5	248.1	265.3
F1PTW4	Uncharacterized protein OS=Canis lupus familiaris GN=STK24 PE=4 SV=2	182.6	210	153.5	185	205.3	195.4	196.3
F1PTX2	Uncharacterized protein OS=Canis lupus familiaris GN=SIRT2 PE=4 SV=2	795.5	1152.4	233.9	237.2	221.1	263.3	230.3
F1PTX4	Keratin, type II cytoskeletal 2 epidermal OS=Canis lupus familiaris GN=KRT2 PE=3 SV=2	200.6	396.1	229.9	274.1	157.4	183.9	202
F1PTY1	Keratin, type II cytoskeletal 1 OS=Canis lupus familiaris GN=KRT1 PE=3 SV=1	357.8	322.9	317.7	536.1	277.1	328.5	281.3
F1PTZ7	CD44 antigen OS=Canis lupus familiaris GN=CD44 PE=4 SV=2	926.4	1092.5	557.2	500	563.9	579.4	551.5
F1PU02	Eukaryotic translation initiation factor 3 subunit F OS=Canis lupus familiaris GN=EIF3F PE=3 SV=2	245.5	276.6	247.9	300.8	289.2	304.5	272.2
F1PU09	Uncharacterized protein OS=Canis lupus familiaris GN=ATL3 PE=4 SV=2	195.4	177.4	169	179	187.1	220.5	180.8
F1PU14	Uncharacterized protein OS=Canis lupus familiaris GN=PDAP1 PE=4 SV=2	136.2	162.5	176	220.4	223	191.1	223.9
F1PU24	Uncharacterized protein OS=Canis lupus familiaris GN=INF2 PE=4 SV=2	188	126.6	104.4	86.9	146.4	97.1	115.4
F1PU34	Uncharacterized protein OS=Canis lupus familiaris GN=CARS PE=3 SV=2	409.3	272	284.7	278.5	288.3	397.4	252.6
F1PU47	Uncharacterized protein OS=Canis lupus familiaris GN=FHL2 PE=4 SV=2	75.9	59	215.1	148.4	231.7	111.8	241.9
F1PU58	Uncharacterized protein OS=Canis lupus familiaris GN=CUL3 PE=3 SV=1	408.2	344.8	330.2	377.2	331.2	317.3	289.6
F1PU59	Uncharacterized protein OS=Canis lupus familiaris GN=PCYOX1L PE=4 SV=2	525.5	475.1	314.8	375.6	356.1	283.1	388.3
[truncated: 1,000 more rows]
